1 **Rat models of human diseases and related phenotypes: a**  
2 **systematic inventory of the causative genes**

3

4

5

6 Claude Szpirer

7

8 Université Libre de Bruxelles, B-6041 Gosselies, Belgium (retired)

9 Current address: Avenue Jassogne, 27; B-1410 Waterloo, Belgium

10

11 [cszpirer@gmail.com](mailto:cszpirer@gmail.com)

12

13

14

15 Short title: Rat disease genes

## 17 **Abstract**

18 The rat has been used for a long time as the model of choice in several biomedical  
19 disciplines. Numerous inbred strains have been isolated, displaying a wide range of  
20 phenotypes and providing many models of human traits and diseases. Rat genome mapping  
21 and genomics was considerably developed in the last decades. The availability of these  
22 resources has stimulated numerous studies aimed at discovering disease genes by positional  
23 identification. Numerous rat genes have now been identified that underlie monogenic or  
24 complex diseases and remarkably, these results have been translated to the human in a  
25 significant proportion of cases, leading to the identification of novel human disease  
26 susceptibility genes, helping in studying the mechanisms underlying the pathological  
27 abnormalities and also suggesting new therapeutic approaches. In addition, reverse genetic  
28 tools have been developed. Several genome-editing methods were introduced to generate  
29 targeted mutations in genes the function of which could be clarified in this manner [generally  
30 these are knockout (KO) mutations]. Furthermore, even when the human gene causing a  
31 disease is identified, mutated rat strains (in particular KO strains) were created to analyze the  
32 gene function and the disease pathogenesis. Today, about 300 rat genes have been identified  
33 as underlying diseases or playing a key role in critical biological processes that are altered in  
34 diseases. This article provides the reader with an inventory of these genes.

36 Why map and identify genes for rat disease phenotypes or related traits? The rat is more than  
37 a bigger mouse, a species which has been the mammalian genetic model of choice for a long  
38 time, with an initial focus on monogenic traits [1-4]. Rat models of monogenic traits and  
39 diseases have also been isolated but the rat has essentially been a key model for studies of  
40 complex traits in fields such as physiology, including cardiovascular and diabetes research,  
41 arthritis, pharmacology, toxicology, oncology and neurosciences. The intermediate size of the  
42 rat allows one to carry out experiments and measurements that are difficult if not impossible  
43 in the mouse and the rat exhibits more sophisticated neurobehavioral traits; it is an important  
44 animal model in neuropsychiatric and behavioral studies; in some scientific fields, the rat thus  
45 provides one with particularly reliable models of human traits or diseases [5-9].  
46 Consequently, many rat strains have been created by selective breeding of animals expressing  
47 a desired phenotype, generating a large collection of genetic models of pathological complex,  
48 polygenic traits, most of which are quantitative. Interestingly, these strains also provide one  
49 with additional phenotypes, which were not selected for. Just as the traits that were selected  
50 for, most of these phenotypes are polygenic. All these phenotypes can be used as models of  
51 human traits or diseases [10], implying that the genes underlying these traits or diseases  
52 should be identified. Information on rat strains and rat disease models, can be found at the  
53 Rat Genome Database (RGD, <https://rgd.mcw.edu/>) [11].  
54 In order to give the rat the status of a valuable genetic model, and in particular to identify the  
55 genes underlying complex traits by forward genetic approaches and to analyze the relevant  
56 biological mechanisms, several tools had to be developed. This has been accomplished.  
57 Genetic and chromosome maps have been developed; the genomic sequence of several rat  
58 strains has been established; a number of resources have been created to provide investigators  
59 with access to genetic, genomic, phenotype and disease-relevant data as well as software  
60 tools necessary for their research [3, 12]. Thanks to these resources, positional identification

61 of numerous genes underlying monogenic or complex diseases and related traits could be  
62 achieved. On the other hand, reverse genetic tools have also been developed. Efficient  
63 methods to generate mutant rats became available; sperm N-ethyl-N-nitrosourea (ENU)  
64 mutagenesis followed by gene-targeted screening methods lead to the isolation of several  
65 mutants, including knockout (KO) strains [13 and references therein]. Rat ES were  
66 successfully derived and could be used for targeted mutations by homologous recombination;  
67 more importantly, several methods not relying on the use of ES cells were introduced to  
68 generated targeted mutations (often these are KO mutations), namely gene editing by zinc  
69 finger nucleases, by transcription activator-like effector nucleases and finally by the clustered  
70 regularly interspaced short palindromic repeat (CRISPR/Cas) system [for a review, see 14].  
71 Transgenic rats can also be generated, including humanized rats carrying large chromosomal  
72 fragments (“transchromosomal humanized” rats) [15]. Development of these technologies  
73 provides the researcher with all the tools required to take advantage of the unique  
74 opportunities offered by the rat as leading model for studies different areas of biomedical  
75 research [3, 8]. In this review I made an inventory of the rat genes identified as responsible  
76 for monogenic or polygenic diseases and related traits. I took into account the rat genes  
77 identified by forward genetic methods as well as those inactivated by ENU-mutagenesis and  
78 by targeted mutations, the inactivation of which generated a disease or an abnormal  
79 phenotype. This inventory shows that a considerable number of conserved genes have similar  
80 effects on biological traits in rats and humans.

## 81 **Materials and methods**

82 The data were collected by regular and systematic screening of the biomedical literature,  
83 PubMed searches (<https://www.ncbi.nlm.nih.gov/>) and Google Scholar alerts based on the  
84 terms “knockout”, “mutation”, “rat”. In addition, relevant data were retrieved from the RGD,  
85 thanks to advices from Jennifer Smith. The official gene symbols are used in this article and  
86 were obtained from the National Center for Biotechnology Information  
87 (<https://www.ncbi.nlm.nih.gov/>), Gene section. In several instances the original publications  
88 did not use the official gene symbol; in these cases, the non-official symbol is indicated in  
89 parenthesis in the footnote to the table, where the full name of each gene is described. The  
90 position of every gene was also obtained from the NCBI.

## 91 **Results and conclusions**

92 The core of this article is a list of the diseases and related traits or phenotypes the causal gene  
93 of which was identified in the rat (Table 1). The genes identified by forward genetic methods  
94 or, in a few instances, by direct molecular characterization are labeled by asterisks (see  
95 legend to table). Also listed are the phenotypes uncovered by reverse genetics methods,  
96 either by ENU-mutagenesis followed by selection of the desired mutated gene (these genes  
97 are labeled by the symbol <sup>ENU</sup>), or by targeted gene editing (these genes are labeled by <sup>T</sup>).  
98 Table 1A shows the monogenic traits, and table 1B the complex traits (in a few cases this  
99 distinction is somewhat arbitrary, but in general this is a useful classification). Of note, when  
100 a gene was associated with several distinct phenotypes, an entry was created for each  
101 phenotype and the gene thus appears several times in the table. When the human homolog  
102 gene is known to be causal of the relevant disease or trait, it is also indicated in the table.  
103 Furthermore, entries in bold characters indicate that the human gene was found to be causal  
104 as a direct translation of the results obtained in the rat.

105 The identification of gene(s) underlying a given phenotype typically starts with the mapping  
106 of the trait by linkage analysis (backcrosses, intercrosses). In the case of monogenic traits,  
107 this approach is generally sufficient to identify the causative gene (positional identification,  
108 as illustrated in Table 1A). Identifying genes controlling complex traits is much more  
109 difficult [16]; indeed, linkage analyses of such traits lead to the localization of quantitative  
110 trait loci (QTLs), which are too large to allow the identification of the causative gene.

111 Complementary strategies are thus required to narrow down the list of candidate genes, such  
112 as the generation of congenic lines or/and the use of integrative genomic approaches [as  
113 discussed in 17]. Alternative approaches rely on the use of panels of lines that show a higher  
114 level of recombinant events, as a result of crossing parental strains for multiple generations,  
115 such as recombinant inbred strains or heterogeneous stocks [as discussed in 18, for a striking

116 harvest of results derived from the study of a heterogeneous stock, see 19]. The first  
117 complex-trait gene identified is the *Cd36* gene, which causes insulin resistance,  
118 hyperlipidemia and hypertension in the spontaneously hypertensive rat (SHR) [20, 21]. This  
119 identification was based on a combined gene expression micro-array and linkage approach  
120 and was definitively proven by in vivo complementation, i.e. transgenic expression of normal  
121 *Cd36* in the SHR [22]. Last but not least, association was then demonstrated between human  
122 *CD36* and insulin resistance [23]. Subsequently, the tools of forward genetic studies as well  
123 as gene expression and/or computational analysis (integrative genomics) led to the  
124 identification of numerous genes underlying rat polygenic traits or diseases, such as blood  
125 pressure, cardiac mass, diabetes, inflammation (in particular arthritis, encephalomyelitis),  
126 glomerulonephritis, mammary cancer, neurobehavioral traits, proteinuria. In several  
127 instances, the results were translated to the human, as illustrated in Table 1 by bold entries.  
128 Interestingly, a recently discovered complex trait gene is a long non-coding RNA, itself  
129 contained within the 5' UTR of the *Rffl* gene (*Rffl-lnc1*); *Rffl-lnc1* shows a 19bp indel  
130 polymorphism which is the precise variation underlying regulation of blood pressure and QT-  
131 interval. This work was based on fine and systematic congenic mapping and is the first one to  
132 identify quantitative trait nucleotides in a long non-coding RNA [24]. The human  
133 homologous region, on chromosome 17, has multiple minor alleles that are associated with  
134 shorter QT-intervals and, in some cases, hypertension [25].

135 Identifying rat disease genes is not only useful to discover the homologous human disease  
136 genes but also helps in studying the mechanisms underlying the pathological abnormalities.  
137 After all, this is the essence of an animal model. For instance, the study of the genetic basis of  
138 stroke in the stroke-prone SHR strain (SHRSP) led to the conclusion that mitochondrial  
139 dysfunction contributes to stroke susceptibility and to hypertensive target organ damage  
140 (such as vascular damage); this better understanding of the etiology of the disease can open

141 the door to novel therapies [26, 27]. Another example is provided by the identification of  
142 *Ncf1* as a causative gene of arthritis [28] which led to the discovery that reactive oxygen  
143 species are important regulators of several chronic inflammatory disorders and more  
144 generally of immune and inflammatory pathways; surprisingly, they have a protective role in  
145 autoimmune diseases [29].

146 The rat is also a useful model to decipher the biological significance of QTLs identified in  
147 human genome-wide association studies (GWAS) aimed at understanding the aetiology of  
148 common human diseases [30, 31]. These studies pinpoint human genomic regions  
149 controlling a complex trait, and generally contain several genes; the current methods lack the  
150 statistical power to pinpoint the human causative gene. Animal model such as the rat provides  
151 one with the possibility to knockout or to mutate in more subtle manner each of the rat genes  
152 homolog to the human genes contained in a given GWAS locus. In this way, the possible role  
153 of each gene can be evaluated. For instance, Flister and c-corkers [32], studying a multigene  
154 GWAS locus controlling blood pressure and renal phenotypes (*AGTRAP-PLOD1* locus) used  
155 gene targeting in a rat model to test each of the genes contained in this locus. In this way  
156 these authors could show that several genes impact hypertension and that multiple causative  
157 gene variants cosegregate at this locus; several linked genes thus control blood pressure  
158 (*Agtrap, Clcn6, Mthfr, Nppa, Plod1*). Furthermore, each of the KO rat models so generated  
159 can be used to dissect the biological effects of the gene loss of function.

160 The genetic basis of human diseases is also actively analyzed by whole genome sequencing;  
161 such studies have uncovered several genes underlying diseases or related phenotypes [33, 34]  
162 and one can thus question the importance of genetic analyses in an animal model. As  
163 argued and illustrated above, animal models and the rat in particular, remain valuable tools to  
164 analyze the biological mechanisms underlying a phenotype. In addition, transgenesis or gene  
165 substitution can also be carried out, in which a human allele can be introduced in the relevant



166 KO rat, in order to verify the role of the human mutation. Alternatively, the rat genome can  
167 be directly modified to specifically introduce a mutation similar to the one causing the human  
168 trait [34, 35]. If the modified rats exhibit defects similar to those observed in the human  
169 patients, it can be concluded that the tested human mutation indeed plays a causal role. In  
170 addition, similarly to examples mentioned above, such specifically modified rats provide one  
171 with models suitable to study the mechanisms responsible for the abnormalities generated by  
172 the mutation and also to carry out pharmacological tests and look for possible new therapies  
173 [35].

174 The need of relevant animal models is also illustrated by the fact that even when the human  
175 gene causing a disease is identified, mutated rat strains (in particular KO strains) are created  
176 to analyze the gene function and the disease pathogenesis (see numerous examples of such  
177 gene targeting in Table 1). In 2008, Aitman and coworkers [2] reported a list of 21 rat disease  
178 genes that had been identified by positional cloning since 1999. Here I included all genes,  
179 independently of the date of their identification. This inventory added a few disease genes  
180 identified before 1999 but mainly numerous genes identified (or deliberately mutated) after  
181 2008. The total rat gene number listed here is over 300, illustrating the vigor of the rat  
182 biomedical research which led to enrichment of numerous disease models, with the  
183 translation to humans of disease gene discoveries in rats.

184 **Table 1: Alphabetical list of diseases and related traits with their causative rat genes and the human homologs**

| <b>Rat</b>                 |                                                                      | <b>Human</b>                                   |                                                                     | <b>Comments</b>                                                                                   | <b>References</b> |
|----------------------------|----------------------------------------------------------------------|------------------------------------------------|---------------------------------------------------------------------|---------------------------------------------------------------------------------------------------|-------------------|
| Phenotype                  | Causative<br>gene name <sup>(1)</sup><br>Localisation <sup>(3)</sup> | Phenotype                                      | Ortholog<br>gene name <sup>(2)</sup><br>Localisation <sup>(3)</sup> |                                                                                                   |                   |
| <b>A) MONOGENIC TRAITS</b> |                                                                      |                                                |                                                                     |                                                                                                   |                   |
| Addiction                  | <i>Bdnf</i> <sup>T</sup><br>3, 100.77 Mb                             | -                                              | -                                                                   | The heterozygous SD KO mutant exhibits no cocaine-seeking behavior, unlike WT rats                | [36]              |
| Addiction                  | <i>Cdh13</i> <sup>T</sup><br>19, 50.85 Mb                            | Substance<br>abuse,<br>behavioral<br>disorders | <i>CDH13</i><br>16q23.3                                             | The SS KO mutant shows a stronger responsiveness to cocaine, metamphetamine and saccharin         | [37]              |
| Addiction:<br>opioid       | <i>Grm2</i> <sup>T</sup><br>2q32,                                    | -                                              | -                                                                   | The Wistar KO mutant shows higher heroin self-administration and heroin intake as well as reduced | [38, 39]          |

|                                             |                                       |                      |                       |                                                                                                                                                                                                                                                                                                                                                                                                            |         |
|---------------------------------------------|---------------------------------------|----------------------|-----------------------|------------------------------------------------------------------------------------------------------------------------------------------------------------------------------------------------------------------------------------------------------------------------------------------------------------------------------------------------------------------------------------------------------------|---------|
| consumption                                 | 179.58 Mb                             |                      |                       | sensitivity to cocaine reward; the results suggest that <i>Grm2</i> may play an inhibitory role in opioid action; see also below, Polygenic traits, Addiction: alcohol consumption                                                                                                                                                                                                                         |         |
| Adiposity (fat pads)                        | <i>Slc22a18</i> **<br>1, 216.67 Mb    | -                    | -                     | Positional identification revealed a splicing mutation in the SHR/NCrj rat (which shows reduced fat pad weight); in 3T3-L1 cells, <i>Slc22a18</i> KO leads to reduction in lipid accumulation                                                                                                                                                                                                              | [40]    |
| Aganglionosis (spotting lethal: <i>sl</i> ) | <i>Ednrb</i> **<br>15q22,<br>88.00 Mb | Hirschsprung disease | <i>EDNRB</i><br>13q22 | Direct analysis of the gene in <i>sl</i> rats revealed a deletion; the mutation was then shown to segregate with the phenotype in congenics; phenotype modulated by modifier genes, including <i>Gdnf</i> ; this gene also controls the captopril effects on blood pressure; in the GK strain, the null mutant causes embryonic death; see also below, Polygenic traits, Blood pressure: captopril effects | [41-47] |
| ALSP                                        | <i>Csf1r</i>                          | ALSP                 | <i>CSF1R</i>          | See Macrophage development                                                                                                                                                                                                                                                                                                                                                                                 | [48]    |

|                                            |                                           |                   |                         |                                                                                                                                                                                                            |      |
|--------------------------------------------|-------------------------------------------|-------------------|-------------------------|------------------------------------------------------------------------------------------------------------------------------------------------------------------------------------------------------------|------|
| Amelogenesis imperfecta                    | <i>Sp6</i> **<br>10q31,<br>84.96 Mb       | -                 | -                       | Direct sequencing of the gene revealed a insertional mutation in a mutant SHRSP strain; the mutation was then shown to segregate with the phenotype; partial complementation in <i>Sp6</i> transgenic rats | [49] |
| Analbuminemia                              | <i>Alb</i> **<br>14p21,<br>19.18 Mb       | Analbuminemi<br>a | <i>ALB</i><br>4q13.3    | Direct cloning of the mutant gene revealed a 7 bp deletion at splicing donor site in intron H of analbuminemic rat, which does not produce cytoplasmic albumin mRNA                                        | [50] |
| Anemia (white spotting rat: <i>Ws/Ws</i> ) | <i>Kit</i> *<br>14, 35.07 Mb              | -                 | -                       | Direct sequencing of the <i>Kit</i> cDNA revealed a 12bp deletion in the <i>Ws/Ws</i> strain, by comparison with the BN and SD sequences                                                                   | [51] |
| Anemia (Belgrade rat)                      | <i>Slc11a2</i> **<br>7, 142.03 Mb         | -                 | -                       | Positional identification of the gene (from Belgrade rats) which shows a missense mutation, inactivating iron transport                                                                                    | [52] |
| Angelman syndrome model                    | <i>Ube3a</i> <sup>T</sup><br>1, 116.59 Mb | Angelman syndrome | <i>UBE3A</i><br>15q11.2 | The SD KO mutant shows delayed reflex development, motor deficits in rearing and fine motor skills, aberrant social communication, impaired touchscreen learning and                                       | [53] |

|                                 |                                                   |                                                        |                              |                                                                                                                                                                                         |          |
|---------------------------------|---------------------------------------------------|--------------------------------------------------------|------------------------------|-----------------------------------------------------------------------------------------------------------------------------------------------------------------------------------------|----------|
|                                 |                                                   |                                                        |                              | memory, decreased brain volume and altered neuroanatomy                                                                                                                                 |          |
| Ataxia and seizure (groggy rat) | <i>Cacna1a</i> **<br>19, 25.45 Mb                 | FHM1, EA2,<br>SCA6                                     | <i>CACNA1A</i><br>19p13      | Positional identification of the gene which shows a missense mutation in the groggy rat, absent in other strains                                                                        | [54]     |
| Ataxia-telangiectasia           | <i>Atm</i> <sup>ENU, T</sup><br>8q24,<br>58.02 Mb | Ataxia-telangiectasia                                  | <i>ATM</i><br>11q22.3        | Rats lacking ATM (missense or KO mutation) display paralysis, neuroinflammation and have significant loss of motor neurons and microgliosis in the spinal cord                          | [55, 56] |
| Autism spectrum disorders       | <i>Cntnap2</i> <sup>T</sup><br>4, 74.70 Mb        | Epilepsy (CDFE syndrome) and autism spectrum disorders | <i>CNTNAP2</i><br>7q35-q36.1 | An SD KO mutant shows a delayed maturation of auditory processing pathways and striking parallels to disruptions reported in autism spectrum disorders; see also below:<br><br>Epilepsy | [57]     |
| Autism spectrum                 | <i>Fmr1</i> <sup>T</sup><br>Xq37,                 | Autism spectrum                                        | <i>FMRI</i><br>Xq27.3        | The SD KO mutant exhibits abnormalities in autism-relevant phenotypes including juvenile play, perseverative behaviors,                                                                 | [58]     |

|                                 |                                            |                           |                                |                                                                                                                                                                                                                                                              |          |
|---------------------------------|--------------------------------------------|---------------------------|--------------------------------|--------------------------------------------------------------------------------------------------------------------------------------------------------------------------------------------------------------------------------------------------------------|----------|
| disorders                       | 154.68 Mb                                  | disorders                 |                                | and sensorimotor gating; see also below, Fragile X syndrome model                                                                                                                                                                                            |          |
| Autism spectrum disorders       | <i>Nlgn3</i> <sup>T</sup><br>X, 71.20 Mb   | Autism spectrum disorders | <i>NLGN3</i><br>Xq13.1         | The SD KO mutant exhibits abnormalities in autism-relevant phenotypes including juvenile play, perseverative behaviors, sensorimotor gating and sleep disruptions                                                                                            | [58, 59] |
| Autism spectrum disorders       | <i>Shank2</i> <sup>T</sup><br>1, 217.15 Mb | Autism spectrum disorders | <i>SHANK2</i><br>11q13.3-q13.4 | The SD KO mutant exhibits social and repetitive impairments, as well as a profound phenotype of hyperactivity and hypermotivation that can be ameliorated through the administration of dopamine receptor 1 or metabotropic glutamate receptor 1 antagonists | [60]     |
| Brain development ( <i>qc</i> ) | <i>Lmx1a</i> <sup>**</sup><br>13, 85.92 Mb | -                         | -                              | Positional identification of the gene, probably involved in development of the ventricular system and dorsal migration of neurons                                                                                                                            | [61]     |
| Cancer                          | <i>Brca2</i> <sup>ENU</sup><br>12p12,      | Breast, ovarian and other | <i>BRCA2</i><br>13q13.1        | The SD KO mutant is sterile and develops a variety of tumors; surprisingly, the female KO rat does not show any                                                                                                                                              | [62]     |

|                |                                                     |                              |                        |                                                                                                                                                                                                                                                                                                                                              |                 |
|----------------|-----------------------------------------------------|------------------------------|------------------------|----------------------------------------------------------------------------------------------------------------------------------------------------------------------------------------------------------------------------------------------------------------------------------------------------------------------------------------------|-----------------|
|                | 0.50 Mb                                             | cancers                      |                        | increased incidence of mammary carcinomas                                                                                                                                                                                                                                                                                                    |                 |
| Cancer         | <i>Msh6</i> <sup>ENU</sup><br>6, 11.64 Mb           | Lynch<br>syndrome<br>(HNPCC) | <i>MSH6</i><br>2p16    | Diverse tumors appear in the homozygous Wistar KO mutant; the tumors exhibit microsatellite instability                                                                                                                                                                                                                                      | [63]            |
| Cancer         | <i>Tp53</i> <sup>ENU, T</sup><br>10q24,<br>56.19 Mb | Li-Fraumeni<br>syndrome      | <i>TP53</i><br>17p13.1 | The heterozygous KO mutants (F344, Wistar, DAc8) develop lymphomas or different types of sarcomas (more typical of human tumors than those found in <i>Tp53</i> mice mutants), depending on the genetic background                                                                                                                           | [64-66]         |
| Cancer, colon  | <i>Apc</i> <sup>ENU</sup><br>18p12,<br>27.01 Mb     | Familial colon<br>cancer     | <i>APC</i><br>5q21-q22 | Two models are available; the <i>Pirc</i> mutant is homozygous lethal while the heterozygous rat develops polyposis and colon cancers, and thus mimics the human <i>APC</i> -dependent neoplasia (unlike the <i>Apc</i> mutant mice); the KAD mutant is homozygous, viable and shows enhanced susceptibility to colon cancer-inducing agents | [67-69]         |
| <b>Cancer,</b> | <b><i>Cdkn1b</i><sup>**</sup>,</b>                  | <b>Multiple</b>              | <b><i>CDKN1B</i></b>   | <b>Positional identification of the gene (encoding p27<sup>Kip1</sup>),</b>                                                                                                                                                                                                                                                                  | <b>[70, 71]</b> |

|                                                     |                                          |                                         |                        |                                                                                                                                                                                                                                                            |      |
|-----------------------------------------------------|------------------------------------------|-----------------------------------------|------------------------|------------------------------------------------------------------------------------------------------------------------------------------------------------------------------------------------------------------------------------------------------------|------|
| <b>multiple endocrine neoplasia-like syndrome X</b> | <b>4q43, 168.69 Mb</b>                   | <b>endocrine neoplasia type 4</b>       | <b>12p13.1</b>         | <b>mutated in the MNX (SD<sup>we</sup>) rat; subsequently, a causative mutation was found in the <i>CDKN1B</i> gene of a patient presenting with pituitary and parathyroid tumors; see also below, Polygenic traits, Cancer, mammary gland development</b> |      |
| Cancer, renal carcinoma                             | <i>Flcn</i> **<br>10, 46.15 Mb           | Birt-Hogg-Dube syndrome                 | <i>BHD</i><br>17p11.2  | Positional identification of the gene: frameshift mutation in the Nihon rat gene, causing a dominant phenotype; LOH in tumors                                                                                                                              | [72] |
| Cancer, renal carcinoma (Eker rat)                  | <i>Tsc2</i> **<br>10q12, 13.96 Mb        | Renal carcinoma                         | <i>TSC2</i><br>16p3.13 | Positional identification of the gene; deletion of the 3' end of the gene; LOH in tumors, which only express the mutant mRNA                                                                                                                               | [73] |
| Cardiac inflammation and fibrosis                   | <i>Sh2b3</i> <sup>T</sup><br>12, 40.26Mb | Increased risk of myocardial infraction | <i>SH2B3</i><br>12q24  | The SS KO mutant shows exacerbated chronic inflammation and fibrosis post myocardial infraction (the gene also controls blood pressure: see below, Polygenic Traits)                                                                                       | [74] |
| Cardiac                                             | <i>Il1rl2</i> <sup>T</sup>               | -                                       | -                      | An SD mutant was generated with cardiac-specific <i>Il1rl2</i>                                                                                                                                                                                             | [75] |



|                         |                                          |                        |                         |                                                                                                                                                                                                                                                      |      |
|-------------------------|------------------------------------------|------------------------|-------------------------|------------------------------------------------------------------------------------------------------------------------------------------------------------------------------------------------------------------------------------------------------|------|
| ischemia                | 9, 47.04 Mb                              |                        |                         | <i>(Il36r)</i> KO; this mutant shows improved cardiac function, reduced inflammatory response and apoptosis after ischemia-reperfusion                                                                                                               |      |
| Cardiac ischemia        | <i>Ubd</i> <sup>T</sup><br>20, 1.87 Mb   | -                      | -                       | The SD KO mutant shows cardiac dysfunction and increased cardiomyocyte apoptosis after myocardial infarction, associated with reduced <i>Cav3</i> expression                                                                                         | [76] |
| Cardiomyopathy          | <i>Dnmt1</i> <sup>T</sup><br>8, 21.92 Mb | -                      | -                       | An SD mutant was generated with cardiac-specific <i>Dnmt1</i> KO; this mutant shows protection against pathological injury induced by adryamycin (increased expression of <i>DNMT1</i> is observed in familial hypertrophic cardiomyopathy patients) | [77] |
| Cardiomyopathy (atrial) | <i>Myh4</i> <sup>T</sup><br>10, 92.63 Mb | Atrial cardiomyopathy  | <i>MYL4</i><br>17q21.32 | The KO mutant reproduces the clinical phenotype, showing atrial arrhythmias, left atrial dilation and progressive atrial fibrosis                                                                                                                    | [34] |
| Cardiomyopathy          | <i>Rbm20</i> **<br>1, 274.39 Mb          | Dilated cardiomyopathy | <i>RBM20</i><br>10q25.2 | Positional identification of the gene; deficiency of <i>Rbm20</i> alters splicing of several transcripts, such as titin and reduces                                                                                                                  | [78] |

|                     |                                     |          |                          |                                                                                                                                                                                                                                                                                      |          |
|---------------------|-------------------------------------|----------|--------------------------|--------------------------------------------------------------------------------------------------------------------------------------------------------------------------------------------------------------------------------------------------------------------------------------|----------|
|                     |                                     | y        |                          | exercise capacity                                                                                                                                                                                                                                                                    |          |
| Cataract (NUC1 rat) | <i>Crybal</i><br>10, 65.16 Mb       | Cataract | <i>CRYBA1</i><br>17q11.2 | Positional identification of the gene: insertion in exon 6 of the NUC1 rat; the mutation is recessive and impairs the development of the retinal pigmented epithelium                                                                                                                | [79, 80] |
| Cataract            | <i>Crygd**</i><br>9q32,<br>71.77 Mb | -        | -                        | Positional identification of the gene: mutation in the start codon of the gene in the SS/Jr-Ctr strain                                                                                                                                                                               | [81]     |
| Cataract            | <i>Gja3**</i><br>15p12,<br>41.15 Mb | Cataract | <i>GJA3</i><br>13q12.11  | Positional identification of the gene: non-conservative base substitution in the gene in a SHRSP-derived strain                                                                                                                                                                      | [82]     |
| Cataract            | <i>Gja8**</i><br>2, 199.05 Mb       | Cataract | <i>GJA8</i><br>1q21      | Positional identification of the gene; 2 rat strains show dominant cataract due to non-conservative base substitutions (SHR-Dca and UPL); the SHR-Dca homozygote exhibits microphthalmia; this mutation also lowers blood pressure; see also below, Polygenic Traits, Blood pressure | [83, 84] |

|                                                                |                                    |                            |                       |                                                                                                                                                                                                                                 |          |
|----------------------------------------------------------------|------------------------------------|----------------------------|-----------------------|---------------------------------------------------------------------------------------------------------------------------------------------------------------------------------------------------------------------------------|----------|
| Cataract                                                       | <i>Lss</i> **<br>20, 12.84 Mb      | Cataract                   | <i>LSS</i><br>21q22.3 | Positional identification of the gene: abnormal splicing in the Shumiya cataract rat; phenotype modified by <i>Fdft1</i> (15, 50.10Mb); both genes affect cholesterol synthesis; lanosterol treatment reduces cataract severity | [85, 86] |
| Cataract ( <i>kfrs4</i> mutation)                              | <i>Mip</i> **<br>7, 2.64 Mb        | Cataract                   | <i>MIP</i><br>12q13.3 | Positional identification of the gene which, in the mutant, shows a 5bp insertion leading to a frameshift mutation producing a truncated protein; the (recessive) mutant was derived from a stock of fancy rats                 | [87]     |
| Chediak-Higashi syndrome model ( <i>beige</i> )                | <i>Lyst</i> *<br>17, 90.32 Mb      | Chediak-Higashi syndrome 1 | <i>LYST</i><br>1q42   | Direct sequencing of the mutant rat <i>beige</i> gene revealed the presence of a large deletion                                                                                                                                 | [88]     |
| Cerebellar vermis defect ( <i>cvd</i> )/ Hobble ( <i>hob</i> ) | <i>Unc5c</i> **<br>2q44, 247.05 Mb | -                          | -                     | Positional identification of the gene; the rat mutation is homolog to mouse rostral cerebellar malformation mutation in the gene encoding netrin receptor C                                                                     | [89]     |

|                                                                                          |                                                   |                             |                          |                                                                                                                                                                                                                                                                      |              |
|------------------------------------------------------------------------------------------|---------------------------------------------------|-----------------------------|--------------------------|----------------------------------------------------------------------------------------------------------------------------------------------------------------------------------------------------------------------------------------------------------------------|--------------|
| Coat color :<br>albinism ;<br>siamese                                                    | <i>Tyr</i> <sup>***,†</sup><br>1q32,<br>151.01 Mb | Ocolocutaneou<br>s albinism | <i>TYR</i><br>11q14.3    | Positional identification of the siamese mutant; an albino DA<br>KO mutant was also generated and correction of the albino<br>mutation was done using the CRISP-Cas system                                                                                           | [90-93]      |
| Coat color :<br>nonagouti                                                                | <i>Asip</i> <sup>***</sup><br>3, 150.49 Mb        | -                           | -                        | Cloning of the basis of homology with the mouse variant:<br>deletion in exon 2 of the nonagouti variant; correction of the<br>mutation using the CRISP-Cas system                                                                                                    | [93, 94]     |
| Coat color :<br>hooded ( <i>h</i> ) and<br>the white<br>spotting rat<br>( <i>Ws/Ws</i> ) | <i>Kit</i> <sup>***</sup><br>14, 35.07 Mb         | -                           | -                        | Positional identification of the gene: two different insertions<br>found in two alleles ( <i>h</i> and <i>h<sup>T</sup></i> ); correction of the hooded<br>mutation using the CRISP-Cas system; the gene is also<br>mutated in the <i>Ws/Ws</i> rat (no melanocytes) | [51, 93, 95] |
| Cockayne<br>syndrome (CS)<br>model                                                       | <i>Ercc6</i> <sup>†</sup><br>16, 8.73 Mb          | Cockayne<br>syndrome        | <i>ERCC6</i><br>10q11.23 | The SD KO mutant display DNA repair-deficient<br>phenotypes and brain abnormalities, features that resemble<br>those of CS patients                                                                                                                                  | [96]         |
| Congenital                                                                               | <i>Cacna1f</i> <sup>**</sup>                      | Congenital                  | <i>CACNA1F</i>           | Direct sequencing of the cDNA revealed a mutation                                                                                                                                                                                                                    | [97]         |

|                                  |                                               |                            |                        |                                                                                                                                                                                                                                                                                                                                                     |           |
|----------------------------------|-----------------------------------------------|----------------------------|------------------------|-----------------------------------------------------------------------------------------------------------------------------------------------------------------------------------------------------------------------------------------------------------------------------------------------------------------------------------------------------|-----------|
| stationary night blindness       | X, 15,71 Mb                                   | stationary night blindness | Xp11.23                | generating a stop codon in a strain of spontaneous mutant rat; in a backcross the mutation was found to segregate with the phenotype                                                                                                                                                                                                                |           |
| Creeping ( <i>cre</i> )          | <i>Reln</i> **<br>4q11, 9.35 Mb               | Lissencephaly              | <i>RELN</i><br>7q22    | Positional identification of the gene, mutated in the KZC rat; the rat mutant is homolog to the mouse <i>reeler</i>                                                                                                                                                                                                                                 | [98]      |
| Cystic fibrosis                  | <i>Cftr</i> <sup>T</sup><br>4q21,<br>42.69 Mb | Cystic fibrosis            | <i>CFTR</i><br>7q31.2  | Three mutant strains were described: two KO mutants and a mutant carrying the most frequent human mutation (F508del); they recapitulate many aspects of the human disease (defects in airway mucus production and tracheal development, involution of the vas deferens, intestinal obstruction.....); see also below, Polygenic traits, Bone growth | [99, 100] |
| Cystic leukoencephalopathy model | <i>Rnaset2</i> <sup>T</sup><br>1, 53.17 Mb    | Cystic leukoencephalopathy | <i>RNASET2</i><br>6q27 | The SD KO mutant shows no brain cystic lesions but exhibits enlarged prefrontal cortex and hippocampal complex as well as memory deficits (less severe                                                                                                                                                                                              | [101]     |

|                                         |                                                 |                               |                         |                                                                                                                                                                                   |       |
|-----------------------------------------|-------------------------------------------------|-------------------------------|-------------------------|-----------------------------------------------------------------------------------------------------------------------------------------------------------------------------------|-------|
|                                         |                                                 |                               |                         | neurodegeneration phenotype than the human patients)                                                                                                                              |       |
| Cystinosis                              | <i>Ctns</i> **<br>10, 59.75 Mb                  | Cystinosis                    | <i>CTNS</i><br>17p13.2  | Positional identification of the gene, partially deleted in the Long-Evans Agouti rat; the mutation also causes renal glucosuria                                                  | [102] |
| Danon disease model                     | <i>Lamp2</i> <sup>T</sup><br>Xq35,<br>124.72 Mb | Danon disease                 | <i>LAMP2</i><br>Xq24    | The SD KO rat shows great similarity to human patients: hypercholesterolemia, hyperglycaemia, cardiomyopathy, and other disorders including retinopathy and chronic kidney injury | [103] |
| Deafness ( <i>dfk</i> : deafness Kyoto) | <i>Kncq1</i> **<br>1q41,<br>223.15 Mb           | Long-QT syndrome,<br>deafness | <i>KCNQ1</i><br>11p15.5 | Positional identification of the gene, partially deleted in the <i>dfk</i> rat, which is also hypertensive                                                                        | [104] |
| Deafness                                | <i>Myo7a</i> **<br>1, 163.00 Mb                 | Usher syndrome 1B             | <i>MYO7A</i><br>11q13.5 | Positional identification of an ENU-induced mutation in Wistar rats (tornado phenotype)                                                                                           | [105] |
| Deafness; Kyoto circling ( <i>kci</i> ) | <i>Pcdh15</i> **<br>20, 14.95 Mb                | Usher syndrome 1F             | <i>PCDH15</i><br>10q21  | Positional identification of the gene, which shows a premature stop codon in the <i>kci</i> mutant                                                                                | [106] |

|                                                 |                                          |                 |                          |                                                                                                                                                                              |       |
|-------------------------------------------------|------------------------------------------|-----------------|--------------------------|------------------------------------------------------------------------------------------------------------------------------------------------------------------------------|-------|
| Deafness, retinal dysfunction                   | <i>Myo15a</i> **<br>10, 46.84 Mb         | Deafness, DFNB3 | <i>MYO15A</i><br>17p11.2 | Positional identification of the gene which shows a non-conservative base substitution in the LEW/Ttm-ci2 rat, causing both deafness and blindness                           | [107] |
| Demyelination (see also below: Hypomyelination) | <i>Aspa</i> <sup>T</sup><br>10, 59.84 Mb | Canavan disease | <i>ASPA</i><br>17p13.2   | The F344 KO mutant shows abnormal myelination in the central nervous system (but no tremor); see also below, Tremor                                                          | [108] |
| Demyelination ( <i>les</i> )                    | <i>Mbp</i> *<br>18, 79.33 Mb             | -               | -                        | Sequencing of the <i>les Mbp</i> gene revealed that it contains a large insertion altering the splicing of the <i>Mbp</i> RNA                                                | [109] |
| Demyelination ( <i>dmy</i> )                    | <i>Mrs2</i> ***<br>17, 42.64 Mb          | -               | -                        | Positional identification of the gene; complementation by cDNA transgenesis in the <i>dmy/dmy</i> rat, which carries an inactivating novel splice acceptor site              | [110] |
| Demyelination ( <i>md</i> )                     | <i>Plp1</i> **<br>X, 107.50 Mb           | -               | -                        | The mutation is linked to the X chromosome; sequencing of the mutant <i>Plp1</i> cDNA revealed a missense mutation, probably inducing a conformational change in the protein | [111] |

|                                       |                                      |                                     |                          |                                                                                                                                                                                                                                                                                                                                                                   |            |
|---------------------------------------|--------------------------------------|-------------------------------------|--------------------------|-------------------------------------------------------------------------------------------------------------------------------------------------------------------------------------------------------------------------------------------------------------------------------------------------------------------------------------------------------------------|------------|
|                                       |                                      |                                     |                          | (homologous to the <i>jimpy</i> mouse mutant)                                                                                                                                                                                                                                                                                                                     |            |
| Demyelination<br>( <i>Taiep</i> )     | <i>Tubb4a</i> **<br>9, 9.96 Mb       | Hypomyelination                     | <i>TUBB4A</i><br>19p13.3 | The mutation was mapped to chromosome 9 in 12 Mb region containing the <i>Tubb4a</i> gene; sequencing of the mutant cDNA revealed a missense mutation                                                                                                                                                                                                             | [112]      |
| Diabetes insipidus                    | <i>Avp</i> ***<br>3q35,<br>123.12 Mb | Neurohypophysial diabetes insipidus | <i>AVP</i><br>20p13      | Direct cloning of the gene which shows a single base deletion in the Brattleboro rat; complementation by transgenesis in the hypothalamus                                                                                                                                                                                                                         | [113, 114] |
| Dilute-opisthotonus<br>( <i>dop</i> ) | <i>Myo5a</i> **<br>8, 82.04 Mb       | Griscelli syndrome type I           | <i>MYO5A</i><br>15q21.2  | Direct sequencing of the cDNA revealed an in frame, 47aa deletion in the <i>dop Myo5a</i> gene, leading to under-expression of the protein (resulting in diluted coat color and ataxia); a second mutant was identified later by whole genome sequencing: it shows several pleiotropic neuropathological and biochemical alterations leading to neurodegeneration | [115, 116] |
| Duchenne muscular                     | <i>Dmd</i> <sup>T</sup><br>Xq22,     | Duchenne muscular                   | DMD<br>Xp21.2-           | Wistar or SD KO rats show several muscle abnormalities (necrosis, fibrosis, reduced strength, reduced motor activity)                                                                                                                                                                                                                                             | [117, 118] |



|                         |                                                   |           |       |                                                                                                                                                                                                                  |            |
|-------------------------|---------------------------------------------------|-----------|-------|------------------------------------------------------------------------------------------------------------------------------------------------------------------------------------------------------------------|------------|
| dystrophy               | 51.15 Mb                                          | dystrophy | p21.1 | and dilated cardiomyopathy                                                                                                                                                                                       |            |
| Drug behavioral effects | <i>Ghsr</i> <sup>ENU</sup><br>2, 113.06 Mb        | -         | -     | Cocaine-treated FHH mutant rats show diminished development of cocaine locomotor sensitization relative to WT rats; see also below, Food intake                                                                  | [119]      |
| Drug metabolism         | <i>Abcb1a</i> <sup>T</sup><br>4q12,<br>22.34 Mb   | -         | -     | Wistar or SD KO mutants show increased brain penetration of drugs and other alterations in drug pharmacokinetic parameters                                                                                       | [120-123]  |
| Drug metabolism         | <i>Abcg2</i> <sup>T</sup><br>4, 88.76 Mb          | -         | -     | The SD KO mutant shows increased brain penetration of drugs and other alterations in drug pharmacokinetic parameters; see also below, Hyperbilirubinemia                                                         | [121, 122] |
| Drug metabolism         | <i>Cyp2c11</i> <sup>T</sup><br>1q53,<br>257.68 Mb | -         | -     | The SD KO mutant male shows reduced fertility (CYP2C11 is a male-specific cytochrome P450); expression of other P450's is upregulated; <i>in vivo</i> , no significant differences were found in drug metabolism | [124]      |

|                         |                                                                                               |                    |                                                       |                                                                                                                                                                                                                                |           |
|-------------------------|-----------------------------------------------------------------------------------------------|--------------------|-------------------------------------------------------|--------------------------------------------------------------------------------------------------------------------------------------------------------------------------------------------------------------------------------|-----------|
| Drug metabolism         | <i>Cyp2e1</i> <sup>T</sup><br>1q41,<br>213.51 Mb                                              | -                  | -                                                     | The SD KO rat is physiologically normal, shows a compensatory expression of CYP3A1 and impaired metabolism of chlorzoxazone, a CYP2E1 substrate                                                                                | [125]     |
| Drug metabolism         | <i>Cyp3a1</i> <sup>T</sup><br>12, 110.539 Mb<br>+ <i>Cyp3a2</i> <sup>T</sup><br>12, 116,41 Mb | -                  | -                                                     | Double SD KO rats are physiologically normal but show increased testosterone serum concentrations; they also show a compensatory expression of several cytochrome isoforms and impaired metabolism towards CYP3A1/2 substrates | [126]     |
| Dwarfism (SDR)          | <i>Gh</i> <sup>**</sup><br>10q32,<br>94.48 Mb                                                 | Dwarfism           | <i>GH</i><br>17q24                                    | Direct cloning of the gene revealed a point mutation causing abnormal splicing in the spontaneous <i>dwarf</i> rat                                                                                                             | [127]     |
| Dwarfism ( <i>mri</i> ) | <i>Prkg2</i> <sup>**</sup><br>14, 12.22 Mb                                                    | Growth retardation | <i>Candidate:</i><br><i>PRKG2</i><br>4q13.1-<br>q21.1 | Positional identification of the gene; complementation in cultured chondrocyte by cDNA transfection (restoration of differentiation)                                                                                           | [128-130] |

|                                                  |                                                |                          |                       |                                                                                                                                                                                                                                                                     |            |
|--------------------------------------------------|------------------------------------------------|--------------------------|-----------------------|---------------------------------------------------------------------------------------------------------------------------------------------------------------------------------------------------------------------------------------------------------------------|------------|
| Dwarfism ( <i>rdw</i> rat)                       | <i>Tg</i> **<br>7, 107.47 Mb                   | -                        | -                     | Sequencing of the <i>Tg</i> cDNA from the <i>rdw</i> rat revealed a missense mutation; rescue from dwarfism was obtained by thyroid function compensation in <i>rdw</i> rats                                                                                        | [131, 132] |
| Dystonia type 25                                 | <i>Gnal</i> <sup>T</sup><br>18q12,<br>62.80 Mb | Dystonia type 25         | <i>GNAL</i><br>18p11  | The SD KO mutant shows early-onset phenotypes associated with impaired dopamine transmission, such as reduction in locomotor activity and an abnormal motor skill learning ability; it may be a valuable tool for finding a suitable treatment for dystonia type 25 | [133]      |
| Ear and eye development ( <i>dumbo</i> mutation) | <i>Hmx1</i> **<br>14, 80.54 Mb                 | Oculo-auricular syndrome | <i>HMX1</i><br>4p16.1 | Positional identification of the gene; large deletion, 80 kb downstream the <i>dumbo</i> rat gene, which is not expressed in the embryo craniofacial mesenchyme                                                                                                     | [134]      |
| Eosinophilia (MES rat)                           | <i>Cyba</i> ***<br>19, 55.25 Mb                | -                        | -                     | Positional identification of the gene; the mutant gene is deleted in the 5' splice site of intron 4, leading to an abnormal mRNA and absence of NADPH oxidase activity;                                                                                             | [135]      |

|                                    |                                            |                                                           |                              |                                                                                                                                                                                                                                               |            |
|------------------------------------|--------------------------------------------|-----------------------------------------------------------|------------------------------|-----------------------------------------------------------------------------------------------------------------------------------------------------------------------------------------------------------------------------------------------|------------|
|                                    |                                            |                                                           |                              | the normal phenotype was restored by transgenesis of the normal gene                                                                                                                                                                          |            |
| Epilepsy<br>( <i>flathead</i> rat) | <i>Cit</i> **<br>12, 46.33 Mb              | Microcephaly                                              | <i>CIT</i><br>12q23.24       | Positional identification of the gene, which shows a single base deletion in the mutant rat ( <i>fh/fh</i> ), generating a stop codon; cytokinesis is defective in neuronal progenitors; this mutation also leads to microcephaly (see below) | [136, 137] |
| Epilepsy                           | <i>Cntnap2</i> <sup>T</sup><br>4, 74.70 Mb | Epilepsy<br>(CDFE syndrome) and autism spectrum disorders | <i>CNTNAP2</i><br>7q35-q36.1 | An SD KO mutant exhibits motor seizures, hyperactivity and increased consolidation of wakefulness and rapid eye movement sleep; see also above: Autism spectrum disorders                                                                     | [138]      |
| Epilepsy<br>(ADLTE mutant)         | <i>Lgi1</i> <sup>ENU</sup><br>1, 256.95 Mb | Epilepsy<br>(ADLTE)                                       | <i>LGII</i><br>10q23.33      | The F344 mutant shows early-onset spontaneous epileptic seizures and audiogenic seizure susceptibility; astrocytic <i>Kcnj10</i> expression is down-regulated                                                                                 | [139, 140] |

|                                              |                                                   |                           |                          |                                                                                                                                                                                             |           |
|----------------------------------------------|---------------------------------------------------|---------------------------|--------------------------|---------------------------------------------------------------------------------------------------------------------------------------------------------------------------------------------|-----------|
| Epilepsy (and ataxia)                        | <i>Kcna1</i> <sup>ENU</sup><br>4q42,<br>159.19 Mb | Episodic ataxia type 1    | <i>KCNA1</i><br>12p13.32 | An F344 ENU-induced mutant showing dominant myokimia, neuromyotonia and epileptic seizures was used for positional identification of the gene; expression studies in <i>Xenopus</i> oocytes | [141]     |
| Epilepsy (febrile seizure ; <i>Hiss</i> rat) | <i>Scn1a</i> <sup>ENU</sup><br>3q, 52.39 Mb       | Febrile seizure, epilepsy | <i>SCN1A</i><br>2q24.3   | The <i>Hiss</i> mutant shows impaired GABA receptor-mediated synaptic transmission                                                                                                          | [142]     |
| Epilepsy                                     | <i>Sv2a</i> <sup>ENU</sup><br>2, 198.32 Mb        | Epilepsy, microcephaly    | <i>SV2A</i><br>1q21.2    | The F344 mutant shows a high susceptibility to the development of kindling                                                                                                                  | [143]     |
| Fabry disease model                          | <i>Gla</i> <sup>T</sup><br>X, 105.41 Mb           | Fabry disease             | <i>GLA</i><br>Xq22.1     | The DA KO mutant manifests symptoms similar to those seen in Fabry patients such as altered touch and pain detection; the sensory neuron cell membrane is sensitized to mechanical probing  | [144]     |
| Food intake                                  | <i>Ghsr</i> <sup>ENU, T</sup><br>2, 113.06 Mb     | -                         | -                        | The FHH mutant shows reduced intake of palatable, high-calorie food (see also above, Drug behavioral effects); the                                                                          | [145-147] |

|                                      |                                                |                    |                         |                                                                                                                                                                                                                                                                                                            |                                        |
|--------------------------------------|------------------------------------------------|--------------------|-------------------------|------------------------------------------------------------------------------------------------------------------------------------------------------------------------------------------------------------------------------------------------------------------------------------------------------------|----------------------------------------|
|                                      |                                                |                    |                         | Wistar KO rat shows reduced body weight and blunted food consumption                                                                                                                                                                                                                                       |                                        |
| Fragile X syndrome model             | <i>Fmr1</i> <sup>T</sup><br>Xq37,<br>154.68 Mb | Fragile X syndrome | <i>FMRI</i><br>Xq27.3   | Two SD KO strains are available; they show disrupted cortical processing of auditory stimuli, hippocampal cellular and synaptic deficits, memory defects, abnormal visual responses, impaired spatial learning, attention deficits (deletion of the KH1 domain); see also above, Autism spectrum disorders | [148, 149 and references therein, 150] |
| Fused pulmonary lobes ( <i>fpl</i> ) | <i>Frem2</i> <sup>**</sup><br>2, 142.75 Mb     | Fraser syndrome    | <i>FREM2</i><br>13q13.3 | Direct sequencing of the <i>fpl</i> cDNA showed a premature stop codon; similarity with the mouse <i>Frem2</i> mutant                                                                                                                                                                                      | [151]                                  |
| Germline development                 | <i>Prdm14</i> <sup>T</sup><br>5, 5.51 Mb       | -                  | -                       | The KO mutant fails to generate primordial germ cells; <i>Prdm14</i> thus plays a key role in the development of these gamete precursors                                                                                                                                                                   | [152]                                  |
| Glycogenesis                         | <i>Phkg2</i> <sup>**</sup>                     | Glycogenesis       | <i>PHKG2</i>            | Direct sequencing of the human and rat cDNA's revealed                                                                                                                                                                                                                                                     | [153]                                  |

|                                     |                                    |                    |                     |                                                                                                                                                                                                      |            |
|-------------------------------------|------------------------------------|--------------------|---------------------|------------------------------------------------------------------------------------------------------------------------------------------------------------------------------------------------------|------------|
| (PHK deficiency; <i>gsd</i> rat)    | 1, 199.02 Mb                       |                    | 16p11.2             | mutations in patients and in the <i>gsd</i> rat                                                                                                                                                      |            |
| Hairlessness                        | <i>Hr</i> **<br>15, 52.24 Mb       | Alopecia, atrichia | <i>HR</i><br>8p21.2 | ENU-induced mutant (Kyoto rhino rat) selected on the basis of the phenotype and then positional identification of the gene; the mutant shows hair loss as well as proteinuria and glomerulosclerosis | [154]      |
| Hairlessness                        | <i>Krt@</i> **<br>7q36, ~141 Mb    | -                  | -                   | Positional identification of the locus revealing a 80kb deletion of several keratin genes in the Hirosaki hairless rats                                                                              | [155]      |
| Hairlessness ( <i>rex</i> mutation) | <i>Krt71</i> **<br>7q36, 143.35 Mb | -                  | -                   | Positional identification of the gene which has a 7bp deletion at the splicing acceptor site of the <i>rex</i> intron 1; curly hair in heterozygotes; hair loss in homozygous                        | [156]      |
| Hairlessness                        | <i>Prss8</i> **<br>1q, 199.37 Mb   | -                  | -                   | Positional identification of the gene: mutations found in affected rats (CR hairless and fuzzy) as well as in mouse (frizzy)                                                                         | [157, 158] |

|                                     |                                          |                                      |                       |                                                                                                                                                                                                                                                                                                                              |            |
|-------------------------------------|------------------------------------------|--------------------------------------|-----------------------|------------------------------------------------------------------------------------------------------------------------------------------------------------------------------------------------------------------------------------------------------------------------------------------------------------------------------|------------|
| Hairlessness and dermatitis         | <i>Trpv3**</i><br>10, 59.83 Mb           | -                                    | -                     | Direct sequencing of the rat cDNA, after positional identification of the mouse gene: dominant, missense mutation in the WBN/Kob-Ht rat and the DS-Nh mouse                                                                                                                                                                  | [159]      |
| Hemochromatosis                     | <i>Tfr2*</i><br>12q12,<br>22.18 Mb       | Hemochromatosis                      | <i>TFR2</i><br>7q22   | Direct sequencing of the gene revealed an Ala679Gly polymorphism; homozygosity for this SNP is associated with the mutant phenotype in a Hsd:HHCL Wistar stock                                                                                                                                                               | [160]      |
| Hemophilia A ( <i>WAG-F8m1Ycb</i> ) | <i>F8**<sup>T</sup></i><br>18, 367.17 Mb | Hemophilia A, hemophilic arthropathy | F8<br>Xq28            | Evaluation of the individual clotting factors revealed a missense mutation in the factor FVIII cDNA of the mutant rat; the hemostatic defect was corrected by administration of human factor VIII; two KO mutants show an hemophilic phenotype and seems to be good models of hemophilic arthropathy or bone transplantation | [161-164]  |
| Hereditary tyrosinemia type I model | <i>Fah<sup>T</sup></i><br>1, 146.71 Mb   | Hereditary tyrosinemia type I        | <i>FAH</i><br>15q25.1 | The SD KO mutant shows the major manifestations of the human disease: hypertyrosinemia, renal tubular damage and liver fibrosis and cirrhosis; Cas9n-mediated genome editing                                                                                                                                                 | [165, 166] |



|                                                                      |                                                 |                           |                      |                                                                                                                                                                                                                                       |                       |
|----------------------------------------------------------------------|-------------------------------------------------|---------------------------|----------------------|---------------------------------------------------------------------------------------------------------------------------------------------------------------------------------------------------------------------------------------|-----------------------|
|                                                                      |                                                 |                           |                      | was used to correct the defect                                                                                                                                                                                                        |                       |
| HPS model:<br>Ruby/Red eye<br>dilution (platelet<br>storage disease) | <i>Rab38</i> <sup>*</sup><br>1, 152.07 Mb       | HPS                       | -                    | Direct sequencing of the gene; same mutation in FH and TM rats, probably derived from a common ancestor; lung surfactant secretion is altered in the mutant rats; <i>Rab38</i> also controls proteinuria (QTL <i>Rf2</i> ; see below) | [167, 168]            |
| Hydrocephalus                                                        | <i>Ccdc39</i> <sup>T</sup><br>2, 120.28 Mb      | -                         | -                    | The SD KO mutant shows severe hydrocephalus with subarachnoid haemorrhage and inflammatory cell invasion into the perivascular space, as well as impaired glymphatic cerebrospinal fluid flow                                         | [169]                 |
| Hydrocephalus                                                        | <i>Ccdc85c</i> <sup>T</sup><br>6, 132.11 Mb     | -                         | -                    | The F344 KO mutant shows non-obstructive hydrocephalus, subcortical heterotopia and intracranial hemorrhage                                                                                                                           | [170]                 |
| Hydrocephalus,<br>X-linked                                           | <i>L1cam</i> <sup>T</sup><br>Xq37,<br>156.90 Mb | X-linked<br>hydrocephalus | <i>L1CAM</i><br>Xq28 | The SD KO male mutant shows reductions in fractional anisotropy and axial diffusivity in the corpus callosum, external capsule, and internal capsule                                                                                  | [171]                 |
| <b>Hyperbilirubin</b>                                                | <i>Abcc2</i> <sup>**T</sup>                     | <b>Hyperbilirubi</b>      | <i>ABCC2</i>         | <b>Direct sequencing of the cDNA in the Eisai</b>                                                                                                                                                                                     | <b>[121, 172-174]</b> |

|                          |                                                   |                                                         |                           |                                                                                                                                                                                                                                                                   |            |
|--------------------------|---------------------------------------------------|---------------------------------------------------------|---------------------------|-------------------------------------------------------------------------------------------------------------------------------------------------------------------------------------------------------------------------------------------------------------------|------------|
| emia                     | 1q, 263.55 Mb                                     | -nemia II /<br>DJS                                      | 10q24                     | hyperbilirubinemic rat (EHBR) revealed a premature stop codon; the same approach in the TR rat showed a 1bp deletion; alterations were found in drug pharmacokinetics in an SD KO mutant; mutations were then discovered in the <i>ABCC2</i> gene of DJS patients |            |
| Hyperbilirubine<br>mia   | <i>Slco1b2</i> <sup>T</sup><br>4, 175.81 Mb       | Hyperbilirubin<br>e-mia (Rotor<br>type)                 | <i>SLCO1B3</i><br>12p12.2 | The SD KO mutant shows increased levels of serum bilirubin and altered pharmacokinetic behavior of pravastatin, an <i>SLCO1B2</i> substrate; it could be a good model of the human Rotor syndrome                                                                 | [175]      |
| Hyperbilirubine<br>mia   | <i>Ugt1a1</i> <sup>***</sup><br>9q35,<br>95.30 Mb | Hyperbilirubin<br>-emia, Crigler-<br>Najjar<br>syndrome | <i>UGT1A</i><br>2q37.1    | Direct sequencing of cDNA showed that the Gunn rat has a frameshift mutation in the 3' region of the gene; correction of the defect could be achieved with recombinant <i>UGT1A</i> adenoviruses                                                                  | [176, 177] |
| Hypercholesterole<br>mia | <i>ApoE</i> <sup>T</sup><br>1, 80.61 Mb           | Familial<br>APOE                                        | <i>APOE</i><br>19q13.32   | An SD KO mutant displays hypercholesterolemia, atherosclerosis, hepatic steatosis and decreased HDL-                                                                                                                                                              | [178-180]  |

|                                                  |                                                   |                               |                        |                                                                                                                                                                                                          |                 |
|--------------------------------------------------|---------------------------------------------------|-------------------------------|------------------------|----------------------------------------------------------------------------------------------------------------------------------------------------------------------------------------------------------|-----------------|
|                                                  |                                                   | deficiency                    |                        | cholesterol levels; another mutant also shows adventitial immune infiltrates; an <i>ApoE/Ldlr</i> double KO mutant was also studied by Zhao et al (2018) [178]                                           |                 |
| Hypercholesterolemia                             | <i>Ldlr</i> <sup>ENU, T</sup><br>8, 22.75 Mb      | Familial hypercholesterolemia | <i>LDLR</i><br>19p13.2 | The F344 and SD mutants display hypercholesterolemia, hypertriglyceridemia, atherosclerosis, xanthomatosis; hepatic steatosis was also found in the SD mutant                                            | [178, 181, 182] |
| Hypercholesterolemia<br>(diet-induced: ExHc rat) | <i>Ppp4r3b</i> <sup>**</sup><br>14, 113.57 Mb     | -                             | -                      | Positional identification of the gene, coupled with gene expression analyses; the gene is under-expressed in the ExHC rat and carries a strain-specific 10 bp deletion leading to a premature stop codon | [183]           |
| Hypodactyly<br>( <i>hd</i> )                     | <i>Cntrob</i> <sup>**</sup><br>10q24,<br>55.90 Mb | -                             | -                      | Positional identification of the gene; the <i>hd</i> allele carries a retroviral insertion; centrobins thus control both limb development and spermatogenesis                                            | [184]           |
| Hypohidrotic ectodermal                          | <i>Edaradd</i> <sup>**</sup><br>17, 90.80 Mb      | Hypohidrotic ectodermal       | EDARADD<br>1q42.3      | Positional identification of the gene, which shows a missense mutation in the sparse-and-wavy rat ( <i>swH</i> ); sparse                                                                                 | [185]           |

|                              |                                                  |                           |                        |                                                                                                                                                                                                                                                                                        |            |
|------------------------------|--------------------------------------------------|---------------------------|------------------------|----------------------------------------------------------------------------------------------------------------------------------------------------------------------------------------------------------------------------------------------------------------------------------------|------------|
| dysplasia ( <i>swh</i> )     |                                                  | dysplasia                 |                        | hair and oligodontia in this mutant rat and in human patients                                                                                                                                                                                                                          |            |
| Hypomyelination              | <i>Bace1</i> <sup>T</sup><br>8, 50.14 Mb         | -                         | -                      | The SD KO mutant shows increased axon density and relatively thinner myelin sheaths around axons of the sciatic nerves; it also shows increased mortality                                                                                                                              | [186]      |
| Hypothyroidism               | <i>Tshr</i> <sup>T</sup><br>6q31.2,<br>115.17 Mb | Congenital hypothyroidism | <i>TSHR</i><br>14q31.1 | The SD KO mutant is infertile and shows the dwarf phenotype as well as suppression of the thyroid-specific genes; the phenotype can be reversed by levothyroxine                                                                                                                       | [187]      |
| Hypotrichosis (hairlessness) | <i>Dsg4</i> <sup>**</sup><br>18, 12.06 Mb        | Hypotrichosis<br>18q12.1  | <i>DSG4</i><br>18q12   | Direct sequencing of the IC hairless rat gene, which shows a large deletion; same approach in the lanceolate hair ( <i>lah</i> ) rat revealed a missense mutation; positional identification of the mutant gene from an SHR congenic strain, which shows a premature termination codon | [188-190]  |
| Immunodeficiency             | <i>Igh</i> <sup>T</sup><br>6q32, ~150 Mb         | -                         | -                      | Two SD KO mutants show absence of Ig and B cells; transgenesis of human <i>IG</i> loci reconstitutes B cell development and leads to humanized Ig production                                                                                                                           | [191, 192] |

|                                          |                                                           |                                            |                         |                                                                                                                                                                                                                                                                                                                                                                                                                   |            |
|------------------------------------------|-----------------------------------------------------------|--------------------------------------------|-------------------------|-------------------------------------------------------------------------------------------------------------------------------------------------------------------------------------------------------------------------------------------------------------------------------------------------------------------------------------------------------------------------------------------------------------------|------------|
| Immunodeficiency (athymia: <i>nude</i> ) | <i>Foxn1</i> <sup>**</sup> , <sup>T</sup><br>10, 65.62 Mb | Lack of thymus, anencephaly                | <i>FOXN1</i><br>17q11.2 | Following positional identification of the mouse gene, the homolog rat gene was found to be mutated in the <i>nude</i> strain, disrupting thymus development and hair growth; two induced Wistar mutants were generated: they show thymus deficiency and incomplete hairless which was characterized by splicing variants                                                                                         | [193-195]  |
| Immuno-deficiency                        | <i>Prkdc</i> <sup>T</sup><br>11, 89.29 Mb                 | Immuno-deficiency, granuloma, autoimmunity | <i>PRDKC</i><br>8q11.21 | The F344 KO mutant shows severe combined immunodeficiency and growth retardation; this mutant was used to establish a model for preclinical testing of human neural precursor cells transplantation as a treatment of neonatal brain damages; a double KO mutant ( <i>Prkdc</i> <sup>-/-</sup> and <i>Il2rg</i> <sup>-/-</sup> ) was also generated; this double mutant shows abolishment of natural killer cells | [196, 197] |
| Immunodeficiency (SCID)                  | <i>Rag1</i> <sup>T</sup><br>3, 91.21 Mb                   | SCID                                       | <i>RAG1</i><br>11p12    | The LEW KO mutant shows lymphocyte depletion (and attenuation of hypertension and renal damage: see below)                                                                                                                                                                                                                                                                                                        | [198]      |

|                                  |                                                                                                                                |        |                        |                                                                                                                                                                                                                                                                                   |            |
|----------------------------------|--------------------------------------------------------------------------------------------------------------------------------|--------|------------------------|-----------------------------------------------------------------------------------------------------------------------------------------------------------------------------------------------------------------------------------------------------------------------------------|------------|
| Immunodeficiency (SCID)          | <i>Rag2</i> <sup>T</sup><br>3, 91.19 Mb                                                                                        | SCID   | <i>RAG2</i><br>11p12   | The SD KO rat lacks mature B and T cells and was shown to be a viable host for a range of xenograft studies                                                                                                                                                                       | [199]      |
| Immunodeficiency (SCID)          | <i>Rag1</i> <sup>T</sup><br>3, 91.21 Mb<br><i>Rag2</i> <sup>T</sup><br>3, 91.19 Mb<br><i>Il2rg</i> <sup>T</sup><br>X, 71.17 Mb | -      | -                      | The SD triple KO mutant shows impaired development of lymphoid organs, is severely immunodeficient with an absence of mature T, B, and NK cells and supports fast growth of patient-derived xenografts thus holding great potential to serve as a new model for oncology research | [200]      |
| Immunodeficiency (X-SCID)        | <i>Il2rg</i> <sup>T</sup><br>X, 71.17 Mb                                                                                       | X-SCID | <i>IL2RG</i><br>Xq13.1 | Two KO mutants are available; they show severe combined immunodeficiency (absence of B and T lymphocytes and of NK cells); a double KO, deficient for both <i>Il2rg</i> and <i>Rag1</i> , was also described: see above                                                           | [201, 202] |
| Infertility (and cryptorchidism) | <i>Adamts16</i> <sup>T</sup><br>1, 36.47 Mb                                                                                    | -      | -                      | The KO SS homozygous mutant exhibits cryptorchidism and is infertile; the gene also controls blood pressure (see below, Polygenic Traits, Blood Pressure)                                                                                                                         | [203]      |

|                                             |                                                                                                                                       |                                            |                         |                                                                                                                                                                                                         |       |
|---------------------------------------------|---------------------------------------------------------------------------------------------------------------------------------------|--------------------------------------------|-------------------------|---------------------------------------------------------------------------------------------------------------------------------------------------------------------------------------------------------|-------|
| Infertility<br>(testicular<br>feminization) | <i>Ar*</i><br>X, 67.66 Mb                                                                                                             | Testicular<br>feminization                 | <i>AR</i><br>Xq12       | Direct sequencing of the gene in a testicular feminized strain: a missense mutation was found in the steroid-binding domain of the androgen receptor                                                    | [204] |
| Infertility                                 | <i>Bscl2</i> <sup>ENU</sup><br>1, 225.04 Mb                                                                                           | Congenital<br>generalized<br>lipodystrophy | <i>BSCL2</i><br>11q12.3 | The male mutant is infertile and shows small testis and azoospermia (the female is fertile); the gene could be involved in male human fertility; see also below, Lipodystrophy and Brain development    | [205] |
| Infertility                                 | <i>Defb23</i> <sup>T</sup><br>3, 147.93 Mb<br><i>Defb26</i> <sup>T</sup><br>3, 147.98 Mb<br><i>Defb42</i> <sup>T</sup><br>15, 46.16Mb | -                                          | -                       | The male SD mutant with CRISPR/Cas9-mediated single <i>Defb</i> gene disruption has no obvious fertility phenotype but the multiple KO mutant ( <i>Defb23/26</i> or <i>Defb23/26/42</i> ) is subfertile | [206] |
| Infertility (male<br>pseudohermaphr         | <i>Dhh</i> <sup>**</sup><br>7, 140.58 Mb                                                                                              | Gonadal<br>dysgenesis                      | <i>DHH</i><br>12q13.12  | Positional identification of the gene which shows a missense mutation in the TF rat; the mutation causes agenesis of                                                                                    | [207] |

|                                    |                                                 |                     |                         |                                                                                                                                                                                                                                                                                                                                                                                            |           |
|------------------------------------|-------------------------------------------------|---------------------|-------------------------|--------------------------------------------------------------------------------------------------------------------------------------------------------------------------------------------------------------------------------------------------------------------------------------------------------------------------------------------------------------------------------------------|-----------|
| -odism: TF rat)                    |                                                 |                     |                         | Leydig cells and androgen deficiency                                                                                                                                                                                                                                                                                                                                                       |           |
| Infertility                        | <i>Esr1</i> <sup>T</sup><br>1q12,<br>41.19 Mb   | -                   | -                       | Male and female SD KO rats are infertile and show gonadal pathologies; see also below, Polygenic Traits, Metabolism                                                                                                                                                                                                                                                                        | [208]     |
| Infertility                        | <i>Esr2</i> <sup>T</sup><br>6q24.2,<br>99.16 Mb | -                   | -                       | Two SD KO mutants were generated; male mutants are fertile while female mutants are infertile (no ovulation); however male mutants exhibit prostatic glandular hyperplasia and changes in expression of genes involved in epithelial proliferation and benign tumor formation; in the female mutants, numerous granulosa cell genes are differentially expressed (including <i>Kiss1</i> ) | [209-211] |
| Infertility                        | <i>Kiss1</i> <sup>T</sup><br>13, 50.53 Mb       | -                   | -                       | Male and female KO rats fail to show secretion of luteinising hormone and onset of puberty                                                                                                                                                                                                                                                                                                 | [212]     |
| Infertility ( <i>ifm</i> mutation) | <i>Sbfl</i> **<br>7, 130.26 Mb                  | Charcot-Marie-Tooth | <i>SBF1</i><br>22q13.33 | Positional identification of the gene, which shows a mutation at a splice site in the <i>ifm</i> mutant; homozygous males are                                                                                                                                                                                                                                                              | [213]     |



|                                                                                |                                             |                                                  |                         |                                                                                                                                                                                                                                   |       |
|--------------------------------------------------------------------------------|---------------------------------------------|--------------------------------------------------|-------------------------|-----------------------------------------------------------------------------------------------------------------------------------------------------------------------------------------------------------------------------------|-------|
|                                                                                |                                             | disease type<br>4B3                              |                         | infertile (azoospermia); females are normal                                                                                                                                                                                       |       |
| Infertility<br>(tremor rat:<br>TRM/Kyo,<br>carrying the <i>tm</i><br>mutation) | <i>Spata22</i> ***<br>10, 59,89 Mb          | -                                                | -                       | Positional identification of a deletion spanning >200kb; the <i>tm</i> deletion causes infertility and absence-like seizure in both sexes; male infertility was complemented by <i>Spata22</i> transgenesis                       | [214] |
| Lipodystrophy,<br>congenital<br>generalized                                    | <i>Bscl2</i> <sup>ENU</sup><br>1, 225.04 Mb | Congenital<br>generalized<br>lipodystrophy       | <i>BSCL2</i><br>11q12.3 | The mutant develops generalized lipodystrophy (lack of white adipose tissue); the mutant is glucose intolerant and shows elevated plasma triglyceride and concentrations; see also above Infertility and below, Brain development | [205] |
| Lipodystrophy,<br>neuropathy                                                   | <i>Lpin1</i> **<br>6, 41.80 Mb              | Rhabdomyolys<br>is<br>Myoglobinuria<br>Metabolic | <i>LPIN1</i><br>2p25.1  | ENU-induced mutant isolated on the basis of the phenotype and positional identification of the gene; the murine gene is mutated in the <i>fld</i> mouse (showing adipocyte defects and demyelination)                             | [215] |

|                                        |                                            | disease traits |                                    |                                                                                                                                                                                                                                           |            |
|----------------------------------------|--------------------------------------------|----------------|------------------------------------|-------------------------------------------------------------------------------------------------------------------------------------------------------------------------------------------------------------------------------------------|------------|
| Lymphopenia<br>(T-cell) & IBD          | <i>Themis</i> **<br>1p, 17.28 Mb           | -              | -                                  | Positional identification of the gene, which shows a mutation in the BN <sup>m</sup> rat (4-nucleotide insertion), impairing <i>Treg</i> function                                                                                         | [216]      |
| Microcephaly<br>( <i>flathead</i> rat) | <i>Cit</i> **<br>12, 46.33 Mb              | Microcephaly   | <i>CIT</i><br>12q23.24             | Positional identification of the gene, which shows a single base deletion in the mutant rat ( <i>fh/fh</i> ), generating a stop codon; cytokinesis is defective in neuronal progenitors; this mutation also leads to epilepsy (see above) | [136, 217] |
| Morphogenesis                          | <i>Lpar1</i> <sup>ENU</sup><br>5, 75.56 Mb | -              | -                                  | The <i>Msh6</i> mutant shows craniofacial disorder and small size                                                                                                                                                                         | [218]      |
| mTORopathy                             | <i>Depdc5</i> <sup>T</sup><br>14, 83.09 Mb | Epilepsy       | <i>DEPDC5</i><br>22q12.2-<br>q12.3 | Homozygous F344 KO rats die <i>in utero</i> ; heterozygous KO rats display cortical cytomegalic dysmorphic neurons and have altered cortical neuron excitability (upregulation of the mTORC1 pathway)                                     | [219]      |
| Mucopolysaccha                         | <i>Arsb</i> ***                            | Mucopolysacc   | <i>ARSB</i>                        | Direct sequencing of the <i>Arsb</i> cDNA showed a frame shift                                                                                                                                                                            | [220, 221] |

|                                                  |                                           |                                              |                         |                                                                                                                                                                                                     |       |
|--------------------------------------------------|-------------------------------------------|----------------------------------------------|-------------------------|-----------------------------------------------------------------------------------------------------------------------------------------------------------------------------------------------------|-------|
| r-idosis VI                                      | 2, 23.39 Mb                               | haridosis VI                                 | 5q11-q13                | mutation with premature stop codon in affected rats (MPR);<br>enzyme replacement therapy                                                                                                            |       |
| Multiple mitochondrial dysfunctions syndrome     | <i>Isca1</i> <sup>T</sup><br>17, 5.28 Mb  | Multiple mitochondrial dysfunctions syndrome | <i>ISCA1</i>            | The heterozygous SD KO mutant is normal but the homozygous mutant shows abnormal development at 8.5 days and dies at embryonic stage                                                                | [222] |
| Myogenic response                                | <i>Dusp5</i> <sup>T</sup><br>1, 274.25 Mb | -                                            | -                       | The FHH.1 <sup>BN</sup> congenic KO mutant shows greater myogenic response of cerebral arteries and enhanced autoregulation of cerebral blood flow                                                  | [223] |
| Neurological disorder ( <i>frogleg</i> mutation) | <i>Bckdk</i> **<br>1, 199.35 Mb           | Autism and epilepsy                          | <i>BCKDK</i><br>16p11.2 | The <i>frogleg</i> mutation causes abnormalities in hind limb function, reduced brain weight, infertility, seizures; positional identification of the gene which shows a critical missense mutation | [224] |
| Neuropathy (Chemotherapy-                        | <i>C3</i> <sup>T</sup><br>9, 9.72 Mb      | -                                            | -                       | C3 is activated by neuronal cells in WT rats after paclitaxel administration; KO rats have reduced intradermal nerve fiber                                                                          | [225] |

|                                |                                            |                                     |                          |                                                                                                                                                                                                                                                                                                              |            |
|--------------------------------|--------------------------------------------|-------------------------------------|--------------------------|--------------------------------------------------------------------------------------------------------------------------------------------------------------------------------------------------------------------------------------------------------------------------------------------------------------|------------|
| induced peripheral neuropathy) |                                            |                                     |                          | loss and mechanical allodynia after paclitaxel treatment                                                                                                                                                                                                                                                     |            |
| Obesity                        | <i>Cdkn1b</i> *<br>4, 168.69 Mb            | Multiple endocrine neoplasia type 4 | <i>CDKN1B</i><br>12p13.1 | The MNX (SD <sup>we</sup> ) rat is mutated in the <i>Cdkn1b</i> gene and shows multiple endocrine neoplasia syndrome (see above, Cancer); this mutant produces elevated levels of ghrelin (which has orexigenic effects) and shows increased food intake with enhanced body fat mass                         | [226]      |
| Obesity                        | <i>Lep</i> <sup>T</sup><br>4, 56.34 Mb     | Obesity                             | <i>LEP</i><br>7q31       | Targeted and ENU-induced mutations; F344 and SD KO rats are obese, infertile and immunodepressed                                                                                                                                                                                                             | [227, 228] |
| Obesity                        | <i>Lepr</i> <sup>**T</sup><br>5, 120.50 Mb | Obesity                             | <i>LEPR</i><br>1p31      | Positional identification of the gene; missense or stop mutation in the Zucker <i>fa</i> and Koletsky <i>obese</i> (“corpulent”) rats, respectively; the SD KO mutant confirms the phenotype of the spontaneous mutant, with glucose intolerance, hyperinsulinemia, dyslipidemia, and diabetes complications | [229-231]  |

|                                                   |                                             |                           |                                    |                                                                                                                                                                                                                   |              |
|---------------------------------------------------|---------------------------------------------|---------------------------|------------------------------------|-------------------------------------------------------------------------------------------------------------------------------------------------------------------------------------------------------------------|--------------|
| Obesity                                           | <i>Mc4r</i> <sup>ENU</sup><br>18, 62.61 Mb  | Obesity                   | <i>MC4R</i><br>18q22               | The MSH6 KO mutant shows increased food intake and adipose mass                                                                                                                                                   | [232]        |
| Osteochondrodysplasia: ( <i>ocd</i> )             | <i>Golgb1</i> **<br>11, 66.76 Mb            | -                         | -                                  | Positional identification of the gene; the mutant shows an abnormal skeletal system and systemic edema                                                                                                            | [233]        |
| <b>Osteopetrosis (incisors absent: <i>ia</i>)</b> | <b><i>Plekhl1</i>**<br/>10, 91.45 Mb</b>    | <b>Osteopetrosis</b>      | <b><i>PLEKHM1</i><br/>17q21.31</b> | <b>Positional identification of the gene: frameshift mutation in the <i>ia</i> rat; mutations discovered in the <i>PLEKHM1</i> gene of osteopetrosis patients</b>                                                 | <b>[234]</b> |
| Osteoporosis pseudoglioma model                   | <i>Lrp5</i> <sup>T</sup><br>1, 218.82 Mb    | Osteoporosis pseudoglioma | <i>LRP5</i><br>11q13.2             | Three independent SD KO lines were generated: they display decreased trabecular bone mass and quality as well as sparse and disorganized superficial retinal vasculature as seen in <i>LRP5</i> -deficient humans | [235]        |
| Parkinson disease model                           | <i>Lrrk2</i> <sup>T</sup><br>7, 132.86 Mb   | Familial PD (dominant)    | <i>LRRK2</i><br>12q12              | The Long Evans KO mutant displays weight gain and an abnormal kidney, lung and liver phenotype                                                                                                                    | [236, 237]   |
| Parkinson disease model                           | <i>Nr4a1</i> <sup>ENU</sup><br>7, 142.90 Mb | -                         | -                                  | The FHH KO mutant shows reduced dopamine cell loss and dyskinesia in an experimental Parkinson disease model; the                                                                                                 | [238]        |

|                          |                                            |                            |                           |                                                                                                                                                                                                         |            |
|--------------------------|--------------------------------------------|----------------------------|---------------------------|---------------------------------------------------------------------------------------------------------------------------------------------------------------------------------------------------------|------------|
|                          |                                            |                            |                           | gene also controls renal function: see below, Renal injury                                                                                                                                              |            |
| Parkinson disease model  | <i>Park7</i> <sup>T</sup><br>5, 167.98 Mb  | Familial PD<br>(recessive) | <i>PARK7</i><br>1p36.23   | The Long Evans KO mutant shows motor deficit and age-dependent neuronal loss; <i>Park7</i> is also involved in the control of PAH (see below, “Blood pressure”)                                         | [239, 240] |
| Parkinson disease model  | <i>Prkn</i> <sup>T</sup><br>1, 48.88 Mb    | Familial PD<br>(recessive) | <i>PRKN</i><br>6q26       | The Long Evans KO mutant is not different from WT rats                                                                                                                                                  | [240]      |
| Parkinson disease model  | <i>Pink1</i> <sup>T</sup><br>5, 156.68 Mb  | Familial PD<br>(recessive) | <i>PINK1</i><br>1p36      | The Long Evans KO mutant shows motor deficit and age-dependent loss of nigral dopaminergic neuronal                                                                                                     | [239-241]  |
| Parkinson disease model  | <i>Snca</i> <sup>*</sup><br>4, 90.78 Mb    | Familial PD<br>(dominant)  | <i>SNCA</i><br>4q22.1     | Direct sequencing revealed a mutation in the <i>Snca</i> mRNA 3’UTR in a mutant rat, which overexpresses synuclein alpha and shows functional alterations in the dopaminergic and glutamatergic systems | [242, 243] |
| Phelan-McDermid syndrome | <i>Shank3</i> <sup>T</sup><br>7, 130.47 Mb | Phelan-McDermid syndrome   | <i>SHANK3</i><br>22q13.33 | The human neurobehavioral manifestations are due to mutations in <i>SHANK3</i> ; one of these mutations (a deletion) was introduced in rats, which exhibited disabilities related to                    | [35]       |

|                                                      |                                           |                                          |                    |                                                                                                                                                                                                   |           |
|------------------------------------------------------|-------------------------------------------|------------------------------------------|--------------------|---------------------------------------------------------------------------------------------------------------------------------------------------------------------------------------------------|-----------|
|                                                      |                                           |                                          |                    | those seen in the human patients; these deficits were attenuated by oxytocin treatment                                                                                                            |           |
| Pinked eyed dilution ( <i>p</i> )                    | <i>Oca2</i> **<br>1q, 114.66 Mb           | Oculocutaneous albinism                  | <i>OCA2</i><br>15q | Direct sequencing of the <i>Oca2</i> cDNA revealed a deletion shared by several mutant strains, that also exhibit the same haplotype, distinct from control strains                               | [244]     |
| Polycystic kidney disease (ADPKD) ( <i>cy/+</i> rat) | <i>Anks6</i> ***<br>5, 62.64 Mb           | Cystic kidney disease (Nephronophthosis) | <i>ANKS6</i>       | Positional identification of the gene, mutated in the Han SD ( <i>cy/+</i> ) rat; overexpression of the mutated variant causes polycystic kidney disease; mutations later found in the human gene | [245-247] |
| Polycystic kidney disease (ARPKD): nephronophthosis  | <i>Nek8</i> **<br>10, 65.40 Mb            | -                                        | -                  | Positional identification of the gene, mutated in the Lewis Polycystic Kidney (LPK) rat, leading to abnormally long cilia on kidney epithelial cells                                              | [248]     |
| Polycystic kidney disease                            | <i>P2rx7</i> <sup>T</sup><br>12, 39.35 Mb | -                                        | -                  | A <i>P2rx7</i> KO was generated in the PCK rat, a model of ARPKD; the mutant shows slower cyst growth and                                                                                         | [249]     |

|                                            |                                              |                                         |                          |                                                                                                                                                                                                                                                                             |            |
|--------------------------------------------|----------------------------------------------|-----------------------------------------|--------------------------|-----------------------------------------------------------------------------------------------------------------------------------------------------------------------------------------------------------------------------------------------------------------------------|------------|
| (ARPKD)                                    |                                              |                                         |                          | reduction of renal pannexin-1 protein expression and daily urinary ATP excretion                                                                                                                                                                                            |            |
| <b>Polycystic kidney disease (ARPKD)</b>   | <i>Pkhd1</i> **<br>9q, 26.16 Mb              | <b>ARPKD</b>                            | <i>PKHD1</i><br>6p12.2   | <b>Positional identification of the rat gene, which lead to the identification of mutations in the human gene responsible for ARPKD</b>                                                                                                                                     | [250]      |
| <b>Polycystic kidney disease (Wpk rat)</b> | <i>Tmem67</i> **<br>5, 27.67 Mb              | <b>Meckel-Gruber syndrome (MKS3)</b>    | <i>TMEM67</i><br>8q24    | <b>Positional identification of the rat gene, which lead to the identification of mutations in the human gene responsible for MKS3; central nervous system defects are also present in human and rat</b>                                                                    | [251]      |
| Polydactyly ( <i>Lx</i> )                  | <i>Zbtb16</i> ** <sup>T</sup><br>8, 52.99 Mb | Skeletal defects and genital hypoplasia | <i>ZBTB16</i><br>11q23.2 | Positional identification of the gene which shows a 2.9 kb deletion in the <i>Lx</i> intron 3 and is down-regulated; the heterozygous SHR KO mutant shows anomalies in the caudal part of the body (caudal regression) and growth retardation (the homozygous KO is lethal) | [252, 253] |
| Pseudoxanthom                              | <i>Abcc6</i> <sup>T</sup>                    | Pseudoxantho-                           | <i>ABCC6</i>             | This mineralization disorder is associated with reduced                                                                                                                                                                                                                     | [254]      |



|                                            |                                            |                                                |                        |                                                                                                                                                                                                                                               |           |
|--------------------------------------------|--------------------------------------------|------------------------------------------------|------------------------|-----------------------------------------------------------------------------------------------------------------------------------------------------------------------------------------------------------------------------------------------|-----------|
| a elasticum                                | 1, 101.95 Mb                               | ma elasticum                                   | 16p13.11               | plasma inorganic pyrophosphate; this study of the SD KO mutant points to a critical role of liver ABCC6                                                                                                                                       |           |
| Reed syndrome                              | <i>Fh<sup>T</sup></i><br>13, 93.65 Mb      | Reed syndrome                                  | <i>FH</i><br>1q43      | The SD heterozygous KO mutant shows hematopoietic and kidney dysfunction with kidney anaplastic lesions                                                                                                                                       | [255]     |
| Retinal dystrophy ( <i>Rdy</i> ) (RCS rat) | <i>Mertk<sup>***</sup></i><br>3, 121.24 Mb | Retinitis pigmentosa (autosomal recessive)     | <i>MERTK</i><br>2q14.1 | Positional identification of the gene: small deletion in the RCS rat, the defect of which could be corrected by gene transfer                                                                                                                 | [256-258] |
| Retinal telangiectasia (BN-J rat)          | <i>Crbl<sup>**</sup></i><br>13, 56.27 Mb   | Retinal dystrophies (including telangiectasia) | <i>CRBI</i><br>1q31.3  | The BN-J rat shows several retinal abnormalities reminiscent of human macular telangiectasia; sequencing of the BN-J and BN exons revealed the presence of rearrangement in exon 6 of BN-J, which segregates with the phenotype in a F2 cross | [259]     |
| Retinitis pigmentosa                       | <i>Pde6b<sup>T</sup></i><br>14, 2.33 Mb    | Retinitis pigmentosa                           | <i>PDE6B</i><br>4p16.3 | The SD KO mutant exhibits photoreceptor degeneration, profound retinal thinning and extensive degeneration of the                                                                                                                             | [260]     |

|                                                         |                                             |                                               |                                       |                                                                                                                                                                           |            |
|---------------------------------------------------------|---------------------------------------------|-----------------------------------------------|---------------------------------------|---------------------------------------------------------------------------------------------------------------------------------------------------------------------------|------------|
|                                                         |                                             | (autosomal<br>recessive)                      |                                       | outer nuclear layer                                                                                                                                                       |            |
| Rett syndrome                                           | <i>Mecp2</i> <sup>T</sup><br>X, 156.65 Mb   | Rett syndrome                                 | <i>MECP2</i><br>Xq28                  | The SD KO mutant shows early motor and breathing abnormalities, growth retardation, malocclusion, reduction of brain weight                                               | [261-263]  |
| Sitosterolemia                                          | <i>Abcg5</i> <sup>**</sup><br>6q12, 7.94 Mb | Sitosterolemia                                | <i>ABCG5/</i><br><i>ABCG8</i><br>2p21 | Positional identification of the gene; same missense mutation in SHR, SHRSP and WKY, exhibiting elevated plant sterol accumulation                                        | [264]      |
| Small eye<br>( <i>rSey</i> ):<br>microphthalmia         | <i>Pax6</i> <sup>*</sup><br>3q, 95.70 Mb    | Aniridia,<br>mental<br>retardation,<br>autism | <i>PAX6</i><br>11p13                  | Direct sequencing of the mutant cDNA, which shows a 0.6kb deletion; impaired migration of neural crest cells; the mutant rat may have some phenotypic component of autism | [265, 266] |
| Spondylocostal<br>dysostosis<br>( <i>Oune</i> mutation) | <i>Tbx6</i> <sup>**</sup><br>1, 198.21 Mb   | Spondylocostal<br>dysostosis                  | <i>TBX6</i><br>16p11.2                | ENU-induced semi-dominant mutation, causing a short and kinked tail and several skeletal abnormalities; positional identification of the mutant gene                      | [267]      |

|                                                       |                                         |                         |                   |                                                                                                                                                                            |            |
|-------------------------------------------------------|-----------------------------------------|-------------------------|-------------------|----------------------------------------------------------------------------------------------------------------------------------------------------------------------------|------------|
| Tenogenesis                                           | <i>Mkx</i> <sup>T</sup><br>17, 60.54 Mb | -                       | -                 | The Wistar KO mutant shows heterotopic ossification of the Achilles tendon via failed tenogenesis                                                                          | [268]      |
| Teratoma and infertility ( <i>ter</i> ) in both sexes | <i>Dnd1</i> **<br>18, 29.61 Mb          | -                       | -                 | Positional identification of the gene: premature stop codon in WKY/Ztm rats; homologous to the mouse mutation <i>Ter</i> (which induces testicular teratomas only)         | [269]      |
| Testicular feminization ( <i>Tfm</i> )                | <i>Ar</i> *<br>Xq22-q32,<br>67.66 Mb    | Testicular feminization | <i>AR</i><br>Xq12 | Direct sequencing of cDNA: single base alteration in the <i>Ar</i> gene leads to androgen insensitivity and lack of male sexual development                                | [204]      |
| T-helper immuno-deficiency ( <i>thid</i> )            | <i>Ptprk</i> **<br>1, 17.44 Mb          | -                       | -                 | Positional identification of the gene: large deletion in LEC rats, the phenotype of which is rescued by reconstitution with normal bone marrow cells                       | [270, 271] |
| Toothless ( <i>tl</i> ), osteopetrosis                | <i>Csfl</i> **<br>2, 210.52 Mb          | -                       | -                 | Positional identification of the gene: early stop codon in the <i>tl Csfl</i> gene; similar to the mouse <i>op</i> ; see “Macrophage development” for <i>Csflr</i> KO rats | [272, 273] |
| Toxicity:                                             | <i>Nfe2l2</i> <sup>T</sup>              | -                       | -                 | The F344 KO mutant is highly sensitive to aflatoxin B1                                                                                                                     | [274]      |

|                                                               |                                             |                              |                         |                                                                                                                                                                                                                                                                            |            |
|---------------------------------------------------------------|---------------------------------------------|------------------------------|-------------------------|----------------------------------------------------------------------------------------------------------------------------------------------------------------------------------------------------------------------------------------------------------------------------|------------|
| aflatoxin B1 toxicity                                         | 3, 62.50 Mb                                 |                              |                         | toxicity, due to impaired capacity for detoxification ( <i>Nfe2l2</i> also controls vasculature function: see below)                                                                                                                                                       |            |
| Toxicity: anthrax toxin susceptibility                        | <i>Nlrp1</i> **<br>10q24,<br>57.69 Mb       | -                            | -                       | Susceptibility maps in the region of <i>Nlrp1</i> (in recombinant inbred strains) and gene polymorphism is correlated with susceptibility in several rat strains (the gene also controls <i>Toxoplasma</i> susceptibility; see above)                                      | [275]      |
| Toxoplasma susceptibility ( <i>Toxo1</i> )                    | <i>Nlrp1</i> ***<br>10q24,<br>57.69 Mb      | Toxoplasmosis susceptibility | <i>NLRP1</i><br>17p13.2 | Positional identification of the gene; KO of <i>Nlrp1</i> in macrophages modifies <i>Toxoplasma</i> replication; in human, association between <i>NLRP1</i> polymorphism and toxoplasmosis susceptibility; the gene also controls sensitivity to anthrax toxin (see below) | [276]      |
| Tremor (tremor rat: TRM/Kyo, carrying the <i>tm</i> mutation) | <i>Aspa</i> *, <sup>T</sup><br>10, 59.84 Mb | Canavan disease              | <i>ASPA</i><br>17p13.2  | Positional identification of a deletion spanning >200kb in the TRM/Kyo rat; NAA, the <i>Aspa</i> precursor induces absence-like seizure in normal rats (the tremor rat exhibits absence-like seizure); the F344 KO mutant show abnormal                                    | [108, 277] |

|                                                 |                                       |   |   |                                                                                                                                                                                                                         |            |
|-------------------------------------------------|---------------------------------------|---|---|-------------------------------------------------------------------------------------------------------------------------------------------------------------------------------------------------------------------------|------------|
|                                                 |                                       |   |   | myelination but no tremor; however an <i>Aspa/Hcn1</i> double mutant shows tremor, like the TRM/Kyo rat (see below, Polygenic traits, “Epilepsy, tremor”, <i>Hcn1</i> )                                                 |            |
| Tremor: Zitter rat ( <i>zi</i> mutation)        | <i>Atrn</i> ***<br>3q35,<br>123.43 Mb | - | - | <i>zi</i> induces hypomyelination and vacuolation in the CNS; positional identification of the gene; <i>zi</i> is homologous to the mouse <i>mg</i> (mahogany); complementation by transgenic membrane-type <i>Atrn</i> | [278, 279] |
| Tremor: VF rat ( <i>vf</i> mutation)            | <i>Dopey1</i> **<br>8, 94.12 Mb       | - | - | <i>vf</i> induces hypomyelination and vacuolation in the CNS; positional identification of the gene, which carries a nonsense mutation                                                                                  | [280]      |
| Tremor ( <i>Trdk</i> mutation)                  | <i>Kcnn2</i> **<br>18, 39.33 Mb       | - | - | ENU-induced missense mutation; positional identification of the mutant gene                                                                                                                                             | [281]      |
| Unilateral renal agenesis (URA; <i>Renag1</i> ) | <i>Kit</i> **<br>14, 37.07 Mb         | - | - | ACI rats exhibit URA; positional identification of the gene, which carries an insertion; cosegregation of URA with the hooded phenotype (controlled by <i>Kit</i> )                                                     | [282]      |

|                                   |                                          |                                |                          |                                                                                                                                                                                                                      |            |
|-----------------------------------|------------------------------------------|--------------------------------|--------------------------|----------------------------------------------------------------------------------------------------------------------------------------------------------------------------------------------------------------------|------------|
| Warfarin resistance ( <i>rw</i> ) | <i>Vkorc1</i> **<br>1, 199.34 Mb         | VKCFD2 and warfarin resistance | <i>VKORC1</i><br>16p11.2 | Positional identification of the gene, mutated in warfarin resistance (human and rat) and VKCFD2 (human)                                                                                                             | [283, 284] |
| Wilson disease model              | <i>Atp7b</i> **<br>16q12,<br>74.87 Mb    | Wilson disease                 | <i>ATP7B</i><br>13q14.3  | Positional identification of the gene: deletion in the LEC rat gene, causing hepatitis                                                                                                                               | [285, 286] |
| Wolfram disease model             | <i>Wfs1</i> <sup>T</sup><br>14, 78.64 Mb | Wolfram disease                | <i>WFS1</i><br>4p16.1    | The SD KO mutant shows the core symptoms of the human disease: diabetes mellitus, glycosuria, neurodegeneration; treatment with a GLP1 receptor agonist prevents the development of diabetic phenotype in the KO rat | [287, 288] |
| Wolman disease model (Wolman rat) | <i>Lipa</i> *<br>1, 252.82 Mb            | Wolman disease                 | <i>LIPA</i><br>10q23     | Direct sequencing of the mutant rat cDNA: deletion of the <i>Lipa</i> gene in the Wolman rat                                                                                                                         | [289]      |
|                                   |                                          |                                |                          |                                                                                                                                                                                                                      |            |
|                                   |                                          |                                |                          |                                                                                                                                                                                                                      |            |

| B) POLYGENIC TRAITS ( <i>QTL symbol</i> ) |                                   |                                    |                                                |                                                                                                                                                                                                                                                                                                                                                                  |           |
|-------------------------------------------|-----------------------------------|------------------------------------|------------------------------------------------|------------------------------------------------------------------------------------------------------------------------------------------------------------------------------------------------------------------------------------------------------------------------------------------------------------------------------------------------------------------|-----------|
| Addiction:<br>alcohol<br>consumption      | <i>Adcyap1r1</i> *<br>4, 85.66 Mb | Alcohol<br>consumption<br>in women | ADCYAP1<br>R1<br>7p14.3<br>(Association study) | Positional identification of the gene and expression studies in congenic strains; the trait is female-specific; <i>Adcyap1r1</i> is upregulated in alcohol-preferring females and its promoter contains several ERE's and polymorphisms associated with a differential response to estrogen stimulation <i>in vitro</i>                                          | [290]     |
| Addiction:<br>alcohol<br>consumption      | <i>Grm2</i> *<br>8, 115.34 Mb     | -                                  | -                                              | Positional identification of the gene; stop codon in the alcohol-preferring rat strain allele; (see also above, Monogenic traits, Addiction; opioid consumption); however, this conclusion was challenged on the basis of experiments showing that a lentiviral-delivered short-hairpin RNA (shRNA)-mediated KO of <i>Grm2</i> does not promote alcohol drinking | [291-293] |
| Addiction:                                | <i>Crhr2</i> *                    | -                                  | -                                              | Polymorphisms in the promoter, coding region, and                                                                                                                                                                                                                                                                                                                | [294]     |

|                                                              |                                       |   |   |                                                                                                                                                                                                                             |       |
|--------------------------------------------------------------|---------------------------------------|---|---|-----------------------------------------------------------------------------------------------------------------------------------------------------------------------------------------------------------------------------|-------|
| alcohol<br>consumption<br>( <i>Alc22</i> )                   | 4, 85.29 Mb                           |   |   | 3'UTR were associated with altered CRHR2 binding density<br>in alcohol-preferring rat strain (no mapping of the trait)                                                                                                      |       |
| Addiction:<br>alcohol<br>consumption<br>( <i>Alc11/13</i> )  | <i>Cyp4f18</i> **<br>16, 19.50 Mb     | - | - | DNA sequencing of rats from HS-derived high- and low-<br>alcohol-drinking lines revealed several genomic regions<br>showing signature of selection, including genes located in<br>previously identified QTLs <sup>(4)</sup> | [295] |
| Addiction:<br>alcohol<br>consumption<br>( <i>Alc11/13</i> )  | <i>Fam129c</i> **<br>16, 20.03 Mb     | - | - | See comment above, on <i>Cyp4f18</i>                                                                                                                                                                                        | [295] |
| Addiction:<br>alcohol<br>consumption<br>( <i>Alc5/9/12</i> ) | <i>Grin2a</i> **<br>10q11,<br>5.71 Mb | - | - | See comment above, on <i>Cyp4f18</i>                                                                                                                                                                                        | [295] |



|                                                             |                                            |   |   |                                                                                                                                          |       |
|-------------------------------------------------------------|--------------------------------------------|---|---|------------------------------------------------------------------------------------------------------------------------------------------|-------|
| Addiction:<br>alcohol<br>consumption<br>( <i>Alc11/13</i> ) | <i>Myo9b</i> **<br>16, 19.67 Mb            | - | - | See comment above, on <i>Cyp4f18</i>                                                                                                     | [295] |
| Addiction:<br>alcohol<br>consumption                        | <i>Npy</i> <sup>T</sup><br>4, 79.56 Mb     | - | - | <i>Npy</i> deletion in an alcohol non-preferring rat model elicits differential effects on alcohol consumption and body weight           | [296] |
| Addiction:<br>alcohol<br>consumption<br>( <i>Alc11/13</i> ) | <i>Pgls</i> **<br>16, 20.02 Mb             | - | - | See comment above, on <i>Cyp4f18</i>                                                                                                     | [295] |
|                                                             |                                            |   |   |                                                                                                                                          |       |
| Adiposity                                                   | <i>Angptl8</i> <sup>T</sup><br>8, 22.86 Mb | - | - | The F344 KO mutant shows lower body weight, lower fat content and lower triglyceride levels, but higher heart lipase levels than WT rats | [297] |

|                                                       |                                                        |                                    |                        |                                                                                                                                                                                                                       |           |
|-------------------------------------------------------|--------------------------------------------------------|------------------------------------|------------------------|-----------------------------------------------------------------------------------------------------------------------------------------------------------------------------------------------------------------------|-----------|
| Allergic rhinitis                                     | <i>Muc1<sup>T</sup></i><br>2, 188.54 Mb                | -                                  | -                      | The SD KO rat shows aggravation of allergic rhinitis and suppression of expression of epithelial cell connection proteins                                                                                             | [298]     |
| Angiogenesis                                          | <i>Wars2<sup>** T</sup></i><br>2q34,<br>201.17 Mb      | Cardio-<br>metabolic<br>phenotypes | <i>WARS2</i><br>1p12   | Positional identification of the gene controlling coronary flow; the BN KO mutant shows diminished cardiac capillary density and reduced coronary flow; the gene also controls the metabolic syndrome                 | [299]     |
| Aorta elastic<br>tissue integrity<br>( <i>Vetf3</i> ) | <i>Pi15<sup>**</sup></i><br>5, 0.79 Mb                 | -                                  | -                      | High resolution mapping in a HS; lower expression of <i>Pi15</i> in the susceptible strain BN (combined with higher expression of a long intergenic noncoding RNA)                                                    | [300]     |
| Arthritis<br>( <i>Pia7, Oia2</i> )                    | <i>Aplec locus<sup>**</sup></i><br>4q42,<br>~155.91 Mb | RA                                 | <i>CLEC4A</i><br>12p13 | <b>Positional identification of the rat gene complex; several polymorphisms in this region including a stop codon in <i>Clec4b2</i>; association was found between RA and <i>CLEC4A</i> (=DCIR) in human patients</b> | [301-303] |
| Arthritis                                             | <i>CIIta<sup>**</sup></i>                              | RA, MS,                            | <i>CIITA</i>           | <b>Positional identification of the rat gene, definitively</b>                                                                                                                                                        | [304]     |

|                                        |                                            |                              |                        |                                                                                                                                                                              |                            |
|----------------------------------------|--------------------------------------------|------------------------------|------------------------|------------------------------------------------------------------------------------------------------------------------------------------------------------------------------|----------------------------|
|                                        | <b>10, 5.21 Mb</b>                         | <b>myocardial infarction</b> | <b>16p13</b>           | <b>identified by sequencing and expression analysis; in human, polymorphism in the promoter was associated with disease susceptibility</b>                                   |                            |
| Arthritis                              | <i>Git2<sup>T</sup></i><br>12, 47.59 Mb    | -                            | -                      | The SD KO rat with induced arthritis shows a more severe disease, with decreased collagen II expression and increased expression of inflammatory cytokines                   | [305]                      |
| Arthritis (Pristane-induced arthritis) | <i>Hip1<sup>**</sup></i><br>12, 24.18 Mb   | -                            | -                      | Positional identification of the gene, which is required for the increased invasiveness of synoviocytes from arthritic rats and from RA patients                             | [306]                      |
| Arthritis ( <i>Pia8</i> )              | <i>Il22ra2<sup>**</sup></i><br>1, 15.09 Mb |                              |                        | See <i>Eae29</i>                                                                                                                                                             |                            |
| Arthritis ( <i>Pia4</i> )              | <i>Ncf1<sup>**</sup></i><br>12, 25.50 Mb   | RA                           | <i>NCF4</i><br>22q13.1 | <b>Positional identification of the gene and of the QTN (M153T substitution), which controls the production of reactive oxygen species; this gene also controls EAN (see</b> | <b>[28, 303, 307, 308]</b> |

|                                                  |                                                                      |    |                         |                                                                                                                                                                                                                                                                                                                                                                                           |            |
|--------------------------------------------------|----------------------------------------------------------------------|----|-------------------------|-------------------------------------------------------------------------------------------------------------------------------------------------------------------------------------------------------------------------------------------------------------------------------------------------------------------------------------------------------------------------------------------|------------|
|                                                  |                                                                      |    |                         | <b>below)</b>                                                                                                                                                                                                                                                                                                                                                                             |            |
| Arthritis<br>(Pristane-<br>induced<br>arthritis) | <i>Lta, Ltb, Tnf,</i><br><i>Lst1, Ncr3**</i><br>20,<br>3.65 -3.71 Mb | -  | -                       | Positional identification of a recombination-resistant 33kb segment, made of 5 genes, within the MHCIII region; one conserved haplotype regulates arthritis; haplotype-specific differences in gene expression and alternative splicing correlate with susceptibility to arthritis; the haplotype specifically regulates adjuvant-induced arthritis, but not antigen-induced autoimmunity | [309, 310] |
| Arthritis: <i>Pia1</i>                           | <i>RT1-Ba**</i><br>20, 4.07 Mb<br>and <i>RT1-Bb**</i><br>20, 4.04 Mb | RA | <i>MHCII</i><br>6p21.32 | Using a mixed genetic and functional approach, these 2 genes (orthologs of the human <i>HLA-DQA</i> and <i>HLA-DQB</i> loci, in the MHCII region) were shown to control the onset and severity of pristane-induced arthritis                                                                                                                                                              | [311]      |
| Arthritis (PIA)                                  | <i>Vav1**</i><br>9q12, 9.62 Mb                                       | RA | <i>VAV1</i><br>19p13.2  | <b>Polymorphism in <i>Vav1</i> controls PIA in the rat; in humans, <i>VAV1</i> SNPs are associated with RA; see also below, <i>Eae4</i></b>                                                                                                                                                                                                                                               | [312]      |

|           |                                          |      |               |                                                                                                                                                                                                                                                                                                            |       |
|-----------|------------------------------------------|------|---------------|------------------------------------------------------------------------------------------------------------------------------------------------------------------------------------------------------------------------------------------------------------------------------------------------------------|-------|
| Asthma    | <i>Trpa1</i> <sup>T</sup><br>5, 3.78 Mb  | -    | -             | The SD KO rat is largely protected from immune cell infiltration into bronchoalveolar lung fluid in the ovalbumin model of asthma ; on the other hand, it shows normal behavioral responses in multiple models of pain and itch                                                                            | [313] |
| Behavior  | <i>Cplx1</i> <sup>T</sup><br>14, 2.20 Mb | -    | -             | The SD KO mutant shows severe ataxias and tremor, dystonia, uncoordinated locomotion, exploratory deficits, anxious behavior and sensory deficits as well as decreased dendritic branching in spinal motor neurons                                                                                         | [314] |
| Behavior  | <i>Phf24</i> <sup>T</sup><br>5, 58.36 Mb | -    | -             | The F344 KO mutant shows no apparent changes in gross behaviors during adolescence but, at older age, it exhibits elevated spontaneous locomotor activity, emotional hyper-reactivity, reduced anxiety behaviors and cognitive deficits; it also shows a higher sensitivity to induced convulsive seizures | [315] |
| Behavior: | <i>Adgrl3</i> <sup>T</sup>               | ADHD | <i>ADGRL3</i> | The SD KO mutant shows persistent hyperactivity, increased                                                                                                                                                                                                                                                 | [316] |

|                                              |                                                   |                                                    |                                 |                                                                                                                                                                                                  |                       |
|----------------------------------------------|---------------------------------------------------|----------------------------------------------------|---------------------------------|--------------------------------------------------------------------------------------------------------------------------------------------------------------------------------------------------|-----------------------|
| ADHD                                         | 14, 28.36 Mb                                      |                                                    | 4q13.1                          | acoustic startle, reduced activity in response to amphetamine and female-specific reduced anxiety-like behavior                                                                                  |                       |
| Behavior:<br>aggressive<br>phenotype         | <i>Tph2<sup>T</sup></i><br>7, 58.04 Mb            | -                                                  | -                               | The DA KO mutant exhibits (as expected) profoundly diminished serotonin level and display increased aggressiveness                                                                               | [317]                 |
| Behavior:<br>anxiety                         | <i>Cckar<sup>*</sup></i><br>14, 59.61 Mb          | -                                                  | -                               | Gene deletion in the OLETF rat; no mapping of the trait; see also above, Body temperature and below, Diabetes, type2                                                                             | [318]                 |
| <b>Behavior:<br/>anxiety,<br/>depression</b> | <b><i>Ctnnd2<sup>**</sup></i><br/>2, 83.39 Mb</b> | <b>Schizophrenia<br/>, Depressive<br/>disorder</b> | <b><i>CTNND2</i><br/>5p15.2</b> | <b>Positional identification of the rat gene; the human gene was then associated with schizophrenia and major depressive disorder</b>                                                            | <b>[19, 319, 320]</b> |
| Behavior:<br>anxiety,<br>depression          | <i>Slc6a4<sup>ENU</sup></i><br>10, 63.15 Mb       | Anxiety/<br>depression                             | <i>SLC6A4</i><br>17q11.2        | The Wistar KO mutant lacking the serotonin transporter shows anxiety, depression-related behavior and impaired object memory as well as alterations in DNA methylation of the urocortin promoter | [321, 322]            |
| Behavior:                                    | <i>Oprl1<sup>ENU</sup></i>                        | -                                                  | -                               | The Wistar KO mutant lacking the nociceptin/orphanin FQ                                                                                                                                          | [323, 324]            |

|                                            |                                               |                               |                      |                                                                                                                                                                                                                                                                                                      |            |
|--------------------------------------------|-----------------------------------------------|-------------------------------|----------------------|------------------------------------------------------------------------------------------------------------------------------------------------------------------------------------------------------------------------------------------------------------------------------------------------------|------------|
| anxiety, drug addiction                    | 3, 177.23 Mb                                  |                               |                      | receptor rat shows an anxiety-like phenotype and is more sensitive to the rewarding effect of morphin                                                                                                                                                                                                |            |
| Behavior: autism-like symptoms             | <i>Nrxn1</i> <sup>T</sup><br>6, 14.75 Mb      | Autism                        | <i>NRXN1</i><br>2p16 | The SD KO mutant shows persistent nonsocial deficits, including hyperactivity, deficits in simple instrumental learning, latent inhibition, and spatial-dependent learning                                                                                                                           | [325]      |
| Behavior: dopamine-related brain disorders | <i>Drd1</i> <sup>ENU</sup><br>17, 11.10 Mb    | -                             | -                    | The Wistar mutant carries a missense mutation that leads to a decreased transmembrane insertion of DRD1; the mutant displays normal basic neurological parameters and locomotor activity but measures of social cognition (such as social interaction) are reduced                                   | [326]      |
| Behavior: dopamine-related brain disorders | <i>Slc6a3</i> <sup>ENU,T</sup><br>1, 32.32 Mb | Several psychiatric disorders | -                    | Two mutants are available: an F344 ENU-induced missense mutant and a targeted Wistar KO mutant; both strains show locomotor hyperactivity and impaired cognitive processes; they represent excellent models for the evaluation of the effects of novel therapeutics on cognitive functions linked to | [327, 328] |

|                                    |                                                 |                  |                        |                                                                                                                                                                                                                                                   |       |
|------------------------------------|-------------------------------------------------|------------------|------------------------|---------------------------------------------------------------------------------------------------------------------------------------------------------------------------------------------------------------------------------------------------|-------|
|                                    |                                                 |                  |                        | the dopamine transporter                                                                                                                                                                                                                          |       |
| Behavior: drug addiction (cocaine) | <i>Trpc4</i> <sup>T</sup><br>2, 143.43 Mb       | -                | -                      | The F344 KO mutant shows reduced acquisition of cocaine self-administration compared to WT rats (the gene is also involved in Blood pressure control –PAH- and Behavior, drug addiction: see below)                                               | [329] |
| Behavior: fear and coping          | <i>Nr3c1</i> <sup>T</sup><br>18p12,<br>31.73 Mb | -                | -                      | A conditional SD KO mutant was generated, targeting output neurons and the prelimbic cortex; females exhibit deficits in acquisition and extinction of fear memory while males exhibit enhanced active-coping behavior during forced swim         | [330] |
| Behavior: mental illnesses         | <i>Disc1</i> <sup>T</sup><br>19, 57.82 Mb       | Mental illnesses | <i>DISC1</i><br>1q41.2 | The SD mutant shows changes in white matter microstructural integrity and deficits in neurite density (it recapitulates many of the neuroimaging findings seen in populations of schizophrenia); the male is more affected than the female mutant | [331] |



|                                                  |                                             |                                               |                            |                                                                                                                                                                                                                         |            |
|--------------------------------------------------|---------------------------------------------|-----------------------------------------------|----------------------------|-------------------------------------------------------------------------------------------------------------------------------------------------------------------------------------------------------------------------|------------|
| Behavior<br>(neuropsychiatric disorders model)   | <i>Cacna1c</i> <sup>T</sup><br>4, 150.64 Mb | Autism,<br>bipolar disorder,<br>schizophrenia | <i>CACNA1C</i><br>12p13.33 | The heterozygous SD KO mutant shows deficits in social behavior and in pro-social ultrasonic communication; however this haploinsufficiency has a minor positive impact on memory functions                             | [332, 333] |
| Behavior: stress response                        | <i>Dpp4</i> <sup>T</sup><br>3, 48.29 Mb     | -                                             | -                          | The DA.F344 KO congenic mutant is stress-resilient and show decreased expression of <i>Nr3c1</i> and <i>Fkbp5</i> in the amygdala and the hypothalamus as well as lower stress-induced peripheral corticosterone levels | [334]      |
| Behavior: stress response                        | <i>Nrg1</i> <sup>T</sup><br>16, 62.97 Mb    | Schizophrenia                                 | <i>NRG1</i><br>8p12        | The F344 KO mutant shows alterations in HPA axis activity and behavioral responses to stress                                                                                                                            | [335]      |
| Behavior: stress response<br>( <i>Stresp24</i> ) | <i>Stim1</i> <sup>**</sup><br>1, 167.37 Mb  | -                                             | -                          | Positional identification of the gene; nonsense mutation in several SHRSP substrain alleles, absent in WKY and other normotensive strains; this mutation impairs Ca <sup>++</sup> signaling in astrocytes               | [336, 337] |
| Bladder function                                 | <i>Trpv4</i> <sup>T</sup>                   | -                                             | -                          | The phenotype of the SD KO mutant shows that in a model                                                                                                                                                                 | [338]      |

|                                         |                                                  |                                  |                          |                                                                                                                                                                                                                                                                                                         |                   |
|-----------------------------------------|--------------------------------------------------|----------------------------------|--------------------------|---------------------------------------------------------------------------------------------------------------------------------------------------------------------------------------------------------------------------------------------------------------------------------------------------------|-------------------|
|                                         | 12, 47.70 Mb                                     |                                  |                          | of underactive bladder, intravesical activation of TRPV4 improves bladder function                                                                                                                                                                                                                      |                   |
| Blood pressure                          | <i>Agtr1a</i> <sup>T</sup><br>17q12,<br>35.91 Mb | -                                | -                        | The MSH6 KO mutant shows an extremely high blood pressure-like phenotype                                                                                                                                                                                                                                | [218]             |
| <b>Blood pressure:</b><br><i>BpQTL2</i> | <i>Adamts16</i> <sup>**T</sup><br>1, 36.47 Mb    | <b>Hypertension</b>              | <i>ADAMTS1</i><br>6 5p15 | <b>Positional identification of the gene, which shows exonic variants; association between ADAMTS16 and blood pressure was then discovered in the human; KO of the gene in SS rats leads to lower blood pressure; this gene also controls male fertility (see above: Monogenic Traits, Infertility)</b> | <b>[339, 340]</b> |
| Blood pressure                          | <i>Add1</i> <sup>**</sup><br>14, 82.06 Mb        | <b>Hypertension and CV risks</b> | <i>ADD1</i><br>4p16.3    | <b>Positional identification of the gene: missense polymorphisms in the Milan Hypertensive Rat and the human; in vitro functional studies</b>                                                                                                                                                           | <b>[341, 342]</b> |
| <b>Blood pressure:</b>                  | <i>Arntl</i> <sup>**</sup>                       | <b>Hypertension</b>              | <i>ARNTL</i>             | <b>Functional polymorphisms found in the rat gene</b>                                                                                                                                                                                                                                                   | <b>[343]</b>      |

|                                      |                                                    |              |                                                                              |                                                                                                                                                                                                       |            |
|--------------------------------------|----------------------------------------------------|--------------|------------------------------------------------------------------------------|-------------------------------------------------------------------------------------------------------------------------------------------------------------------------------------------------------|------------|
| <i>Bp77</i>                          | 1, 171.06 Mb                                       | and NIDDM    | 11p15                                                                        | promoter; association was then established in the human with blood pressure and type 2 diabetes                                                                                                       |            |
| Blood pressure                       | <i>Cd247</i> <sup>T</sup><br>13q23,<br>88.88 Mb    | Hypertension | 1q24 locus<br>( <i>GPA33</i> ,<br><i>CD247</i> , <i>F5</i> ,<br><i>REN</i> ) | The KO SS mutant exhibits reduced kidney infiltration of T cells, mean arterial blood pressure and kidney damage                                                                                      | [344, 345] |
| Blood pressure                       | <i>Cd36</i> **<br>4, 14.15 Mb                      | -            | -                                                                            | Positional identification of the gene, combined with gene expression studies; deficient renal expression of <i>Cd36</i> (in SHR) is a genetically determined risk factor for spontaneous hypertension | [21]       |
| Blood pressure<br>( <i>C17QTL1</i> ) | <i>Chrm3</i> ** <sup>T</sup><br>17q12,<br>63.99 Mb | -            | -                                                                            | Positional identification of the gene; the SS rats carry a missense mutation enhancing receptor activity; the KO SS mutant exhibits lower salt-induced hypertension and improved renal function       | [346]      |
| Blood pressure                       | <i>Chst12</i> **                                   | Hypertension | 7p22                                                                         | Positional identification of the gene; the SS allele contains                                                                                                                                         | [347]      |

|                |                                           |              |                                               |                                                                                                                                                                                                                                                                                 |       |
|----------------|-------------------------------------------|--------------|-----------------------------------------------|---------------------------------------------------------------------------------------------------------------------------------------------------------------------------------------------------------------------------------------------------------------------------------|-------|
|                | 12, 18.19 Mb                              |              |                                               | mutations when compared with several normotensive strains;<br>this rat region is homologous to a region on human chromosome 7 that has been linked to blood pressure                                                                                                            |       |
| Blood pressure | <i>Clcn6</i> <sup>T</sup><br>5, 168.47 Mb | Hypertension | <i>AGTRAP-</i><br><i>PLOD1</i><br>locus; 1p36 | The KO SS mutant shows decreased blood pressure; the human locus was identified in GWAS and <i>CLCN6</i> could be linked to blood pressure and renal phenotypes                                                                                                                 | [32]  |
| Blood pressure | <i>Cyp11b1</i> **<br>7, 112.98 Mb         | -            | -                                             | Positional identification of the gene; the characteristic steroid profiles of SS and SR rats can be explained by the biochemical properties of CYP11B1; 5 mutations found in the SS allele, segregating with blood pressure and altered steroid biosynthesis in a SS X SR cross | [348] |
| Blood pressure | <i>Cyp17a1</i> **<br>1q55, 266.42 Mb      | Hypertension | <i>CYP17A1</i><br>10q24.32                    | Extensive proteomics and transcriptome studies in the BN and SHR strains led to the discovery that <i>Cyp17a1</i> is downregulated in SHR, probably as a consequence of a promoter mutation; in the human a SNP in <i>CYP17A1</i> was                                           | [349] |

|                |                                                   |                 |                           |                                                                                                                                                                                               |       |
|----------------|---------------------------------------------------|-----------------|---------------------------|-----------------------------------------------------------------------------------------------------------------------------------------------------------------------------------------------|-------|
|                |                                                   |                 |                           | associated with hypertension                                                                                                                                                                  |       |
| Blood pressure | <i>Gja8</i> **<br>2, 199.05 Mb                    | -               | -                         | The <i>Gja8</i> mutation present in the SHR-Dca strain (causing cataract; see above, Monogenic Traits) lowers blood pressure and decreases high density lipoprotein cholesterol concentration | [350] |
| Blood pressure | <i>Gper1</i> <sup>T</sup><br>12, 17.31 Mb         | -               | -                         | The KO SS mutant (male and female) presents with lower blood pressure, accompanied by altered microbiota and improved vascular relaxation                                                     | [351] |
| Blood pressure | <i>Hsd11b2</i> <sup>T</sup><br>19q12,<br>37.48 Mb | SAME            | <i>HSD11B2</i><br>16q22.1 | The F344 KO mutant exhibits hypertension, hypokalemia, renal injury; the phenotype closely models the human SAME                                                                              | [352] |
| Blood pressure | <i>Htr7</i> <sup>T</sup><br>1, 254. 55 Mb         | -               | -                         | Unlike wild-type rats, the SD KO mutant does not show reduced mean arterial pressure nor splanchnic venodilation upon serotonin infusion                                                      | [353] |
| Blood pressure | <i>Kcnj1</i> <sup>T</sup>                         | Type II Bartter | <i>KCNJ1</i>              | The KO SS mutant exhibits protection from salt-induced                                                                                                                                        | [354] |

|                |                                              |                                      |                                |                                                                                                                                                                                                                                                                                                              |            |
|----------------|----------------------------------------------|--------------------------------------|--------------------------------|--------------------------------------------------------------------------------------------------------------------------------------------------------------------------------------------------------------------------------------------------------------------------------------------------------------|------------|
|                | 8, 33.45 Mb                                  | syndrome                             | 11q24                          | blood pressure elevation                                                                                                                                                                                                                                                                                     |            |
| Blood pressure | <i>Kcnj16</i> <sup>T</sup><br>10, 99.33 Mb   | Brugada<br>syndrome<br>(arrhythmias) | <i>KCNJ16</i><br>17q24.3       | The KO SS mutant exhibits hypokalemia and reduced blood pressure; when fed on a high salt diet, this mutant dies as a result of salt wasting and severe hypokalemia                                                                                                                                          | [355]      |
| Blood pressure | <i>Ncf2</i> <sup>***, T</sup><br>13, 75.2 Mb | -                                    | -                              | Positional identification of the gene, which shows higher expression and promoter mutation in the SS rat; disruption of the gene reduces hypertension and renal oxidative stress and injury; <i>Ncf2</i> is involved in luminal flow-mediated O <sub>2</sub> <sup>-</sup> production (i.e. oxidative stress) | [356, 357] |
| Blood pressure | <i>Nox4</i> <sup>T</sup><br>1, 150.80 Mb     | -                                    | -                              | The KO SS mutant shows reduction of salt-induced hypertension and of albuminuria compared with wild-type SS rats; <i>Nox4</i> contributes to the production of H <sub>2</sub> O <sub>2</sub> (i.e. oxidative stress)                                                                                         | [357, 358] |
| Blood pressure | <i>Nppa</i> <sup>T</sup><br>5q36,            | Hypertension                         | <i>AGTRAP-</i><br><i>PLOD1</i> | The KO SS mutant shows increased blood pressure; the human locus had been identified in GWAS and <i>NPPA</i> could                                                                                                                                                                                           | [32]       |

|                |                                                |                                                        |                           |                                                                                                                                                    |       |
|----------------|------------------------------------------------|--------------------------------------------------------|---------------------------|----------------------------------------------------------------------------------------------------------------------------------------------------|-------|
|                | 165.81 Mb                                      |                                                        | locus; 1p36               | be linked to blood pressure phenotypes                                                                                                             |       |
| Blood pressure | <i>Nppb</i> <sup>T</sup><br>5q36,<br>164.79 Mb | Hypertension<br>and left<br>ventricular<br>dysfunction | <i>NPPB</i><br>1p36.22    | The KO SS mutant shows adult-onset hypertension, left ventricular hypertrophy and increased cardiac stiffness                                      | [359] |
| Blood pressure | <i>Nr2f2</i> <sup>T</sup><br>1, 131.45 Mb      | Hypertension                                           | <i>NR2F2</i><br>15q26     | <i>NR2F2</i> was associated with hypertension in humans; an hypomorphic SS mutant shows lower systolic and diastolic blood pressures               | [360] |
| Blood pressure | <i>Pappa2</i> <sup>**</sup><br>13, 36.39 Mb    | -                                                      | -                         | Positional identification of the gene (including generation of SS subcongenic strains); renal cortex <i>Pappa2</i> mRNA level is lower in SS rats  | [361] |
| Blood pressure | <i>Plekha7</i> <sup>T</sup><br>1, 185.43 Mb    | Hypertension                                           | <i>PLEKHA7</i><br>11p15.1 | <i>PLEKHA7</i> is a candidate gene for human hypertension; the KO SS mutant shows attenuated salt-sensitive hypertension and vascular improvements | [362] |
| Blood pressure | <i>Plod1</i> <sup>T</sup>                      | Hypertension                                           | <i>AGTRAP-</i>            | The KO SS mutant shows increased systolic blood pressure;                                                                                          | [32]  |

|                |                                               |      |                            |                                                                                                                                                               |            |
|----------------|-----------------------------------------------|------|----------------------------|---------------------------------------------------------------------------------------------------------------------------------------------------------------|------------|
|                | 5, 168.38 Mb                                  |      | <i>PLOD1</i><br>locus 1p36 | the human locus was identified in GWAS                                                                                                                        |            |
| Blood pressure | <i>Prdx2</i> <sup>T</sup><br>19, 26.08 Mb     | -    | -                          | The KO SHR mutant exhibits shorter life span and modest blood pressure increase via increased oxidative stress                                                | [363]      |
| Blood pressure | <i>Ragl</i> <sup>T</sup><br>3, 97.87 Mb       | SCID | <i>RAG1</i><br>11p13       | The KO SS mutant exhibits attenuation of blood pressure and of renal damage (and lymphocyte depletion: see above)                                             | [364]      |
| Blood pressure | <i>Rarres2</i> <sup>T</sup><br>4, 78.21 Mb    | -    | -                          | SD KO females (but not KO males) exhibit a relative resistance to hypertension in response to a hypertensive challenge                                        | [365]      |
| Blood pressure | <i>Ren</i> <sup>T</sup><br>13q13,<br>55.55 Mb | -    | -                          | The KO SS mutant shows a greatly reduced blood pressure, changes in kidney morphology and reduced adrenal synthesis of aldosterone and Cyp11b2                | [366, 367] |
| Blood pressure | <i>Respl8</i> <sup>T</sup><br>9, 82.47 Mb     | -    | -                          | The KO SS mutant shows increased systolic and diastolic blood pressure, as well as increased renal damage ( <i>Respl8</i> is located in a blood pressure QTL) | [368]      |



|                                      |                                              |              |                       |                                                                                                                                                                                                                                                                     |            |
|--------------------------------------|----------------------------------------------|--------------|-----------------------|---------------------------------------------------------------------------------------------------------------------------------------------------------------------------------------------------------------------------------------------------------------------|------------|
| Blood pressure                       | <i>Sh2b3</i> <sup>T</sup><br>12, 40.26 Mb    | Hypertension | <i>SH2B3</i><br>12q24 | <i>SH2B3</i> has been associated with hypertension; in the KO SS mutant, hypertension and renal disease are attenuated via inflammatory modulation (the gene also controls cardiac inflammation: see above)                                                         | [369]      |
| Blood pressure                       | <i>Sry1</i> *<br>Y                           | Hypertension | ?<br>Y                | Delivery of <i>Sry1</i> cDNA to the kidney increases blood pressure in normotensive WKY rats                                                                                                                                                                        | [370]      |
| Blood pressure                       | <i>Zbtb16</i> ** <sup>T</sup><br>8, 51.57 Mb | -            | -                     | Positional identification of the gene in RI strains and in an SHR-PD congenic; deletion in the intron 2 of the PD allele, which is down-regulated and is protective; the heterozygous SHR KO mutant shows no change in blood pressure (the homozygous KO is lethal) | [371, 372] |
| Blood pressure:<br>captopril effects | <i>Ednrb</i> **<br>15q22,<br>88.00 Mb        | -            | -                     | The antihypertensive effects of the ACE inhibitor captopril behave as a polygenic trait in RI strains; <i>Ednrb</i> was positionally identified: correlation between renal expression and captopril effects; this gene also controls aganglionosis                  | [373]      |

|                        |                                                |                            |                         |                                                                                                                                                                                                                                      |       |
|------------------------|------------------------------------------------|----------------------------|-------------------------|--------------------------------------------------------------------------------------------------------------------------------------------------------------------------------------------------------------------------------------|-------|
|                        |                                                |                            |                         | (see above)                                                                                                                                                                                                                          |       |
| Blood pressure:<br>PAH | <i>Ddah1</i> <sup>T</sup><br>2, 251.63 Mb      | -                          | -                       | The SD KO mutant shows no specific phenotype under control conditions, but exhibits exacerbated monocrotaline-induced PAH, lung fibrosis as well as right ventricule hypertrophy and dysfunction                                     | [374] |
| Blood pressure:<br>PAH | <i>Kcnk3</i> <sup>T</sup><br>6, 27.15 Mb       | PAH                        | <i>KCNK3</i><br>2p23.3  | The KO mutant shows predisposition to vasoconstriction of pulmonary arteries, strong alteration of right ventricular cardiomyocyte excitability and develops age-dependent PAH                                                       | [375] |
| Blood pressure:<br>PAH | <i>Park7</i> <sup>T</sup><br>5, 167.98 Mb      | Familial PD<br>(recessive) | <i>PARK7</i><br>1p36.23 | The KO mutant shows a worse degree of PAH than WT rats under hypoxia                                                                                                                                                                 | [376] |
| Blood pressure:<br>PAH | <i>Slc39a12</i> <sup>**T</sup><br>17, 81.46 Mb | -                          | -                       | WKY rats exposed to hypoxia show increased expression of the <i>Slc39a12</i> gene (ZIP12 protein) , in contrast to F344 rats and this gene was identified as a positional candidate gene; the KO WKY mutant shows attenuation of PAH | [377] |

|                                   |                                           |             |                                   |                                                                                                                                                                                                                                                                                                                                    |            |
|-----------------------------------|-------------------------------------------|-------------|-----------------------------------|------------------------------------------------------------------------------------------------------------------------------------------------------------------------------------------------------------------------------------------------------------------------------------------------------------------------------------|------------|
| Blood pressure:<br>PAH            | <i>Sod3</i> <sup>T</sup><br>14, 61.07 Mb  | -           | -                                 | In the KO SS mutant, the mutation favors PAH and subsequent RV hypertrophy under stress conditions                                                                                                                                                                                                                                 | [378]      |
| Blood pressure:<br>PAH            | <i>Trpc4</i> <sup>T</sup><br>2, 143.43 Mb | -           | -                                 | The KO F344 mutant shows reduced severity of pulmonary arterial occlusions and survival benefit in severe PAH (the gene is also involved in Pain, see below and Behavior, drug addiction: see above)                                                                                                                               | [379]      |
| Blood pressure<br>and QT-interval | <i>Rffl-lnc1</i> ***<br>10, 71.07 Mb      | QT-interval | 17q12<br>( <i>RFFL</i><br>region) | Positional identification of the gene; the LEW allele contains a 19 bp deletion in the long non-coding RNA (5'UTR of <i>Rffl</i> ), which increases blood pressure and shortens QT-interval relative to the SS rats ("cryptic allele"); the normal phenotypes were rescued by a specific targeted 19bp insertion in the LEW allele | [24]       |
| Body<br>temperature               | <i>Cckar</i> *<br>14, 59.61 Mb            | -           | -                                 | Gene deletion in OLETF rats (no mapping of the trait): the gene seems also involved in diabetes development and behaviour; see also above, Behavior, anxiety and below                                                                                                                                                             | [380, 381] |

|                                |                                               |                                     |                       |                                                                                                                                                                                                                         |            |
|--------------------------------|-----------------------------------------------|-------------------------------------|-----------------------|-------------------------------------------------------------------------------------------------------------------------------------------------------------------------------------------------------------------------|------------|
|                                |                                               |                                     |                       | Diabetes type2                                                                                                                                                                                                          |            |
| Body weight<br>(muscle mass)   | <i>Mstn</i> <sup>T</sup><br>9, 53.31 Mb       | -                                   | -                     | SS and SD KO mutants were studied; they show marked increases in muscle mass and lower fat content                                                                                                                      | [382, 383] |
| Body weight<br>(liver mass)    | <i>Ogdh</i> <sup>T</sup><br>14, 86.41 Mb      | Hypotonia,<br>metabolic<br>acidosis | <i>OGDH</i><br>7p13   | The KO heterozygous mutant shows increased liver weight; high fat diet results in liver dysfunction (homozygous mutants are lethal)                                                                                     | [384]      |
| Bone growth                    | <i>Cftr</i> <sup>T</sup><br>4q21, 42.69<br>Mb | Cystic fibrosis                     | <i>CFTR</i><br>7q31.2 | Young SD KO rats do not develop lung or pancreatic disease; however, they show a defect in linear bone growth and bone health that is attributed to IGF-1 deficiency (for Cystic fibrosis, see above, Monogenic traits) | [385]      |
| Bone growth                    | <i>Nppc</i> <sup>T</sup><br>9, 93.73 Mb       | Short stature                       | <i>NPPC</i><br>2q37.1 | The F344 KO mutant exhibits a deficit in endochondral bone growth and growth retardation                                                                                                                                | [386]      |
| Bone structure<br>and function | <i>Bglap</i> <sup>T</sup><br>2, 87.74 Mb      | -                                   | -                     | The SD KO mutant shows increased trabecular thickness, density and volume, and increased bone strength                                                                                                                  | [387]      |
| Brain                          | <i>Bscl2</i> <sup>ENU</sup>                   | Congenital                          | <i>BSCL2</i>          | The mutant shows a slightly decreased brain weight and                                                                                                                                                                  | [205]      |

|                                        |                                                                  |                              |                  |                                                                                                                                                                                                                                                 |       |
|----------------------------------------|------------------------------------------------------------------|------------------------------|------------------|-------------------------------------------------------------------------------------------------------------------------------------------------------------------------------------------------------------------------------------------------|-------|
| development                            | 1, 225.04 Mb                                                     | generalized<br>lipodystrophy | 11q12.3          | impairment of spatial working memory; see also above,<br>Monogenic Traits, Lipodystrophy, and Infertility                                                                                                                                       |       |
| Brain injury                           | <i>Aqp4</i> <sup>T</sup><br>18, 6.77 Mb                          | -                            | -                | Following subarachnoid hemorrhage, the KO mutant shows increased water content in the whole brain, which aggravates the neurological deficits through impairment of the glymphatic system.                                                      | [388] |
| Cancer, colon                          | <i>Rffl</i> or <i>Rffl-lnc1</i> *<br>10, 70,16 Mb<br>or 71.07 MB | -                            | -                | Positional identification of the gene(s); higher expression of <i>Rffl</i> in S-LEW congenic rats, which also show higher expression of <i>Mbd2</i> and higher susceptibility to colorectal carcinogenesis (see Blood pressure and QT-interval) | [389] |
| Cancer,<br>mammary<br>( <i>Mcs1a</i> ) | <i>Putative<br/>regulatory<br/>site</i> **<br>2, ~6.50 Mb        | -                            | -                | Positional identification of the locus; cancer resistance is associated with increased expression of the nearby gene <i>Nr2f1</i> ; the human homologous region (5q11-q34) is frequently deleted in breast cancers                              | [390] |
| Cancer,                                | <i>Mier3</i> **                                                  | Breast cancer                | <i>MAP3K1</i> or | Positional identification of the gene; higher expression in                                                                                                                                                                                     | [391] |

|                                                |                                           |                                     |                                                   |                                                                                                                                                                                                     |                   |
|------------------------------------------------|-------------------------------------------|-------------------------------------|---------------------------------------------------|-----------------------------------------------------------------------------------------------------------------------------------------------------------------------------------------------------|-------------------|
| mammary<br>( <i>Mcs1b</i> )                    | 2, 62.31 Mb                               | risk locus                          | <i>MIER3</i><br>5q11.2                            | mammary glands of susceptible females                                                                                                                                                               |                   |
| <b>Cancer,<br/>mammary<br/>(<i>Mcs5a1</i>)</b> | <b><i>Fbxo10</i>**<br/>5, 60.59 Mb</b>    | <b>Breast cancer<br/>risk locus</b> | <b><i>FBXO10</i><br/>(<i>MCS5A1</i>)<br/>9p13</b> | <b>Positional identification of the gene; up-regulation in T cells is associated with susceptibility; causal SNVs are probably stress-responding regulatory sites</b>                               | <b>[392, 393]</b> |
| <b>Cancer,<br/>mammary<br/>(<i>Mcs5a2</i>)</b> | <b><i>Frmpd1</i>**<br/>5, 60,75 Mb</b>    | <b>Breast cancer<br/>risk locus</b> | <b><i>FRMPD1</i><br/>(<i>MCS5A2</i>)<br/>9p13</b> | <b>Positional identification of the gene; up-regulation in the spleen was associated with cancer resistance</b>                                                                                     | <b>[393]</b>      |
| Cancer,<br>mammary<br>( <i>Mcs5c</i> )         | <i>Regulatory<br/>site**</i><br>5, ~81 Mb | -                                   | -                                                 | Positional identification of the locus; <i>Msc5c</i> is located in a gene desert and regulates expression of the neighboring gene <i>Pappal</i> during a critical mammary developmental time period | [394, 395]        |
| Cancer,<br>mammary<br>( <i>Mcs30</i> )         | <i>Fry</i> *<br>12, 7.68 Mb               | -                                   | -                                                 | Positional identification of the gene; several SNPs between F344 (susceptible) and COP (resistant); decreased expression of FRY in human cancers                                                    | [396]             |

|                                   |                                              |                                     |                          |                                                                                                                                                                                                                                                                                                                                                                         |       |
|-----------------------------------|----------------------------------------------|-------------------------------------|--------------------------|-------------------------------------------------------------------------------------------------------------------------------------------------------------------------------------------------------------------------------------------------------------------------------------------------------------------------------------------------------------------------|-------|
| Cancer, mammary gland development | <i>Cdkn1b</i> <sup>T</sup> ,<br>4, 168.69 Mb | Multiple endocrine neoplasia type 4 | <i>CDKN1B</i><br>12p13.1 | In the human the frequency of a population of quiescent <i>CDKN1B</i> expressing cells was associated with breast cancer risk; the <i>Cdkn1b</i> KO ACI rat shows increased proliferation and pregnancy-associated changes in the mammary gland; <i>Cdkn1b</i> could impact mammary cancer risk; see also above, Monogenic Traits, Cancer, multiple endocrine neoplasia | [70]  |
| Cardiac mass                      | <i>Cfb</i> <sup>T</sup>                      | -                                   | -                        | See below, Metabolic syndrome                                                                                                                                                                                                                                                                                                                                           | [397] |
| Cardiac mass ( <i>Cm10</i> )      | <i>Endog</i> <sup>**</sup><br>3, 8.74 Mb     | -                                   | -                        | Positional identification of the gene, which is underexpressed in strains with increased cardiac mass; exonic mutation in SHR; <i>Endog</i> seems to be implicated in mitochondrial physiology                                                                                                                                                                          | [398] |
| Cardiac mass (LVM)                | <i>Ogn</i> <sup>**</sup><br>17, 14.61 Mb     | LVM                                 | <i>OGN</i><br>9q22.31    | <b>Localization of a QTL and genome-wide gene expression studies associated upregulation of <i>Ogn</i> (due to sequence variation in the <i>Ogn</i> 3' UTR) with elevated LVM; this finding was translated to humans</b>                                                                                                                                                | [399] |

|                                                          |                                                  |                   |                   |                                                                                                                                                                                                                                                                                                                       |            |
|----------------------------------------------------------|--------------------------------------------------|-------------------|-------------------|-----------------------------------------------------------------------------------------------------------------------------------------------------------------------------------------------------------------------------------------------------------------------------------------------------------------------|------------|
| Cardiac mass, fibrosis                                   | <i>Zbtb16</i> <sup>**T</sup><br>8, 51.57 Mb      | -                 | -                 | Positional identification of the gene in RI strains and in an SHR-PD congenic: deletion in the intron 2 of the PD allele, which is down-regulated and is protective; the heterozygous SHR KO mutant shows reduced cardiomyocyte hypertrophy and interstitial fibrosis (the homozygous KO is lethal)                   | [371, 372] |
| Cholesterol level and hepatic steatosis ( <i>Hpcl1</i> ) | <i>Srebf1</i> <sup>***</sup><br>10, 46.33 Mb     | Cholesterol level | SREBF1<br>17p11.2 | Positional identification of the gene; the SHR allele is associated with deficient expression of mRNA and protein; an SHR transgenic strain shows restoration of hepatic cholesterol level                                                                                                                            | [400]      |
| Chronic kidney disease(CKD)                              | <i>Mir146b (5p)</i> <sup>T</sup><br>1, 266.09 Mb | -                 | -                 | CKD contributes to secondary cardiovascular impairment (cardiorenal syndrome type 4); in the surgical excision model of 5/6 nephrectomy, the KO SD female mutant shows sex-specific exacerbated renal hypertrophy and fibrosis with renal dysfunction yet lower blood pressure and less pronounced cardiac remodeling | [401]      |



|                                                             |                                            |                              |                         |                                                                                                                                                                                                                                                                      |           |
|-------------------------------------------------------------|--------------------------------------------|------------------------------|-------------------------|----------------------------------------------------------------------------------------------------------------------------------------------------------------------------------------------------------------------------------------------------------------------|-----------|
| Chronic kidney disease(CKD)                                 | <i>Sod3</i> <sup>ENU</sup><br>14, 60.96 Mb | -                            | -                       | The SS mutant develops profound CKD characterized by focal necrosis and fibrosis, glomerulosclerosis, massive proteinaceous cast accumulation with tubular dilatation, interstitial fibrosis with hypertension and renal failure ; see also below, Vascular function | [402]     |
| Diabetes, type 1: T1DM ( <i>Kdp1</i> )                      | <i>Cblb</i> <sup>***</sup><br>11, 51.04 Mb | -                            | -                       | Positional identification of the gene, mutated in the Komeda diabetes-prone rat; complementation with the WT gene significantly suppressed the phenotype of the KDP rats                                                                                             | [403]     |
| Diabetes, type 1: T1DM ( <i>Iddm8</i> )                     | <i>Dock8</i> <sup>**</sup><br>1, 242.93 Mb | -                            | -                       | Positional identification of the gene which harbors a missense mutation in the diabetic LEW.1AR1/ <i>Ztm-idmm</i> rat                                                                                                                                                | [404]     |
| Diabetes, type 1 : T1DM<br>Lymphopenia ( <i>Iddm2/lyp</i> ) | <i>Gimap5</i> <sup>**</sup><br>4, 78.38 Mb | Systemic lupus erythematosus | <i>GIMAP5</i><br>7q36.1 | Positional identification of the gene, mutated in the diabetes-prone BB rat; lymphopenia is essential for the development of the diabetic phenotype; in the human, <i>GIMAP5</i> could play a role in the pathogenesis of systemic lupus erythematosus               | [405-407] |
| Diabetes, type 1:                                           | <i>Ifnar1</i> <sup>T</sup>                 | T1DM                         | Several                 | Two KO LEW.1WR1 mutants were isolated; they exhibit, as                                                                                                                                                                                                              | [408]     |

|                               |                                           |                                            |                                          |                                                                                                                                                                                                                                                                                                   |              |
|-------------------------------|-------------------------------------------|--------------------------------------------|------------------------------------------|---------------------------------------------------------------------------------------------------------------------------------------------------------------------------------------------------------------------------------------------------------------------------------------------------|--------------|
| T1DM                          | 11, 31.64 Mb                              |                                            | genes acting downstream<br><i>IFNAR1</i> | expected, an impaired response to interferon I treatment; they are partially protected against virus-induced diabetes                                                                                                                                                                             |              |
| <b>Diabetes, type 2: T2DM</b> | <b><i>Adra2a</i>**</b><br>1, 274.77 Mb    | <b>Increased T2DM risk</b>                 | <b><i>ADRA2A</i></b><br><b>10q25.2</b>   | <b>Positional identification of the gene, overexpressed in the diabetic Goto-Kakizaki rat, mediating adrenergic suppression of insulin secretion; association was then found between <i>ADRA2A</i> and increased T2DM risk in humans</b>                                                          | <b>[409]</b> |
| Diabetes, type 2: T2DM        | <i>Abcc8</i> <sup>T</sup><br>1, 102.11 Mb | T2DM and Hyperinsulinemic hypoglycemia and | <i>ABCC8</i><br>11p15.1                  | The KO SD mutant is glucose intolerant and shows enhanced insulin sensitivity; T2DM was induced in this mutant which was then treated with glimepiride (a sulfonylurea); the treatment decreased blood glucose levels, suggesting an extra-pancreatic, direct effect on insulin-sensitive tissues | [410, 411]   |
| Diabetes, type                | <i>Cckar</i> **                           | -                                          | -                                        | Positional identification of the gene, deleted in the OLETF                                                                                                                                                                                                                                       | [412, 413]   |

|                                                                                 |                                              |                                                           |                                  |                                                                                                                                                                                                                                                                                                |                     |
|---------------------------------------------------------------------------------|----------------------------------------------|-----------------------------------------------------------|----------------------------------|------------------------------------------------------------------------------------------------------------------------------------------------------------------------------------------------------------------------------------------------------------------------------------------------|---------------------|
| 2 : T2DM<br>( <i>Odb2</i> )                                                     | 14, 59.61 Mb                                 |                                                           |                                  | rats; mapping studies suggest an interaction with an X-linked QTL; the gene might also control pancreatic duct hyperplasia; see also above, Body temperature and Behavior, anxiety                                                                                                             |                     |
| <b>Diabetes :<br/>T2DM (Insulin<br/>resistance and<br/>hyperlipidemia<br/>)</b> | <b><i>Cd36</i>***<br/>4, 14.15 Mb</b>        | <b>T2DM:<br/>Insulin<br/>resistance,<br/>dyslipidemia</b> | <b><i>CD36</i><br/>7q21.11</b>   | <b>Positional identification of the gene, combined with genome-wide gene expression studies; <i>Cd36</i> is deleted in the SHR strain; transgenic expression of <i>Cd36</i> in SHR ameliorates insulin resistance and lowers serum fatty acids; association of human <i>CD36</i> with T2DM</b> | <b>[20, 22, 23]</b> |
| <b>Diabetes, type<br/>2: T2DM<br/>(<i>Nidd/gk1</i>)</b>                         | <b><i>Inpp1</i>**<br/>1q33<br/>166.90 Mb</b> | <b>T2DM</b>                                               | <b><i>INPPL1</i><br/>11q13.4</b> | <b>Positional identification of the gene, mutated in the Goto-Kakizaki diabetic rat (and the insulin-resistant SHR); mutations were then found in human diabetic patients</b>                                                                                                                  | <b>[414]</b>        |
| Diabetes, type 2:<br>T2DM<br>(diet-induced)                                     | <i>Ndufa4</i> *<br>4, 38.23 Mb               | -                                                         | -                                | Positional identification of the gene, which shows a 61bp deletion, unique to the Cohen diabetic rat; this mutation adversely affects mitochondrial function and promotes diet-                                                                                                                | [415]               |

|                                                          |                                             |                                      |                                       |                                                                                                                                                                                         |              |
|----------------------------------------------------------|---------------------------------------------|--------------------------------------|---------------------------------------|-----------------------------------------------------------------------------------------------------------------------------------------------------------------------------------------|--------------|
|                                                          |                                             |                                      |                                       | induced diabetes                                                                                                                                                                        |              |
| Diabetes, type 2: T2DM (fat mass and insulin resistance) | <i>Pparg</i> <sup>ENU</sup><br>4, 147.27 Mb | Lipodystrophy and insulin resistance | <i>PPARG</i><br>3p25.2                | The heterozygous F344 missense mutant shows reduced fat mass with adipocyte hypertrophy and insulin resistance (the homozygous mutant is lethal)                                        | [416]        |
| Diabetes, type 2: T2DM ( <i>Dmol1</i> )                  | <i>Prlhr</i> **<br>1, 289.10 Mb             | Blood pressure                       | <i>PRLHR</i><br>10q26.13              | Positional identification of the gene; point mutation at translation initiation codon in the OLETF rats; the mutation causes hyperphagia                                                | [417]        |
| Diabetes, type 2 : T2DM (beta cell lipotoxicity)         | <i>Tlr4</i> <sup>T</sup><br>5, 82.59 Mb     | -                                    | -                                     | The SD KO mutant shows delayed damage induced by high-fat diet, improved beta-cell function, decreased pancreatic inflammatory infiltration and apoptosis; see also below, Inflammation | [418]        |
| <b>Diabetes, type 2: T2DM</b>                            | <i>Tpcn2</i> ***<br>1, 218.42 Mb            | <b>Fasting insulin</b>               | <b><i>TPCN2</i></b><br><b>11q13.3</b> | <b>QTL was detected in a HS; differential expression of <i>Tpcn2</i>; nonsynonymous coding variant as well as other SNPs were associated with fasting glucose; <i>TPCN2</i> was</b>     | <b>[419]</b> |

|                                                  |                                                            |                                             |                           | <b>associated with fasting insulin in humans</b>                                                                                                                  |       |
|--------------------------------------------------|------------------------------------------------------------|---------------------------------------------|---------------------------|-------------------------------------------------------------------------------------------------------------------------------------------------------------------|-------|
| Diabetes, type 2: T2DM (Diabetic kidney disease) | <i>Trpc6</i> <sup>T</sup><br>8, 6.81 Mb                    | Familial focal segmental glomerulosclerosis | <i>TRPC6</i><br>11q22.1   | The results indicate that TRPC6 channel inhibition (in the SS rat background) has partial renoprotective effects in diabetic rats                                 | [420] |
| Encephalomyelitis (EAE)                          | <i>Cd8a</i> <sup>ENU</sup><br>4, 163.99 Mb                 | -                                           | -                         | The KO Lewis mutant is protected from EAE                                                                                                                         | [421] |
| EAE                                              | <i>Dlk1</i> **<br>6, 142.74 Mb                             | IDDM (depending of parental origin)         | <i>DLK1</i><br>14q32      | Parent-of-origin dependent QTL; the paternal PVG risk allele predisposes to low <i>Dlk1</i> expression; transgenic mice overexpressing <i>Dlk1</i> are protected. | [422] |
| EAE: <i>Eae1</i>                                 | <i>Btnl2</i> *<br>20p12,<br>6.22MB and<br><i>RT1-Db1</i> * | Multiple sclerosis                          | <i>HLA-DRB1</i><br>6p21.3 | Positional identification: the two genes in the MHC class II locus were identified in a HS and are the best candidate variants, amongst 3 candidate genes         | [320] |

|                                     |                                |                       |                         |                                                                                                                                                                                                                                                                  |            |
|-------------------------------------|--------------------------------|-----------------------|-------------------------|------------------------------------------------------------------------------------------------------------------------------------------------------------------------------------------------------------------------------------------------------------------|------------|
|                                     | 20p12,<br>6.17 Mb              |                       |                         |                                                                                                                                                                                                                                                                  |            |
| EAE: <i>Eae30</i>                   | <i>Rgma</i> *<br>1, 134.70 Mb  | Multiple<br>sclerosis | <i>RGMA</i><br>15q26.1  | Positional identification of the rat gene but polymorphisms of <i>Rgma</i> were not sought; it is thus a suggestive causal gene; however this result lead to the discovery that a SNP in <i>RGMA</i> is associated with multiple sclerosis in the human          | [423]      |
| EAE: <i>Eae4</i>                    | <i>Vav1</i> **<br>9q12, 8.6 Mb | Multiple<br>sclerosis | <i>VAV1</i><br>19p13.2  | Positional identification of the gene: one SNP in rat exon 1 correlates with EAE susceptibility and high TNF; in humans, association found between <i>VAV1</i> haplotype (high expression) and multiple sclerosis; the gene also regulates arthritis (see above) | [312, 424] |
| EAE: <i>Eae31</i> ;<br><i>Pia32</i> | <i>Il21r</i> *<br>1, 197.00 Mb | Multiple<br>sclerosis | <i>IL21R</i><br>16p12.1 | Positional identification of the rat gene but polymorphisms of <i>Il21r</i> were not sought; it is thus a suggestive causal gene; however this result lead to the                                                                                                | [423]      |

|                                                    |                                             |                               |                                  |                                                                                                                                                                                                                    |                   |
|----------------------------------------------------|---------------------------------------------|-------------------------------|----------------------------------|--------------------------------------------------------------------------------------------------------------------------------------------------------------------------------------------------------------------|-------------------|
|                                                    |                                             |                               |                                  | <b>discovery that SNP's in <i>IL21R</i> are associated with multiple sclerosis in the human</b>                                                                                                                    |                   |
| <b>EAE: <i>Eae29</i>;<br/><i>Pia8</i></b>          | <b><i>Il22ra2</i>**<br/>1, 15.09 Mb</b>     | <b>Multiple<br/>sclerosis</b> | <b><i>IL22RA2</i><br/>6q23.3</b> | <b>The susceptible strain DA carries a unique variant of the gene, which is differently expressed; a SNP in <i>IL22RA2</i> was associated with multiple sclerosis</b>                                              | <b>[303, 425]</b> |
| EAN: <i>Ean6</i>                                   | <i>Ncf1</i> *<br>12, 25.50 Mb               | Guillain-Barré<br>syndrome    | -                                | Positional identification of the gene, a suggestive causal gene: no polymorphism between strains was sought but functional studies support the role of <i>Ncf1</i> (the gene also controls EAE and PIA: see above) | [426]             |
| Epilepsy<br>(idiopathic,<br>generalized;<br>GAERS) | <i>Cacna1h</i> **<br>10, 14.73 Mb           | Absence<br>epilepsy           | <i>CACNA1H</i><br>16p13.3        | Direct sequencing of the gene showed a mutation in the Genetic Absence Epilepsy Rats from Strasbourg (and not in non-epileptic strains); in an F2 cross, the phenotype segregates with the mutation                | [427]             |
| Epilepsy, tremor                                   | <i>Hcn1</i> **, <sup>T</sup><br>2, 50.10 Mb | Infantile<br>epileptic        | <i>HCN1</i><br>5p12              | Positional identification of the gene; a typical example of epistasis: rats (TRM/Kyo) possessing a large deletion ( <i>tm</i> )                                                                                    | [428, 429]        |

|                                     |                                                                   |                 |                         |                                                                                                                                                                                                                                                                                                                                                                     |            |
|-------------------------------------|-------------------------------------------------------------------|-----------------|-------------------------|---------------------------------------------------------------------------------------------------------------------------------------------------------------------------------------------------------------------------------------------------------------------------------------------------------------------------------------------------------------------|------------|
|                                     |                                                                   | encephalopathy  |                         | on chromosome 10 (240 Kb; 13 genes) exhibit tremor if they also possess the allele <i>Hcn1<sup>A354V</sup></i> ; when this allele is replaced by <i>Hcn1<sup>V35A</sup></i> tremor is absent (TRMR rats); subsequently, an F344 KO mutant was generated and showed susceptibility to induced seizure                                                                |            |
| Glomerulonephritis ( <i>Crgn8</i> ) | <i>Cp</i> **<br>2, 104.74 Mb                                      | -               | -                       | Positional identification of the gene in combination with genome-wide eQTL mapping and functional tests; ceruloplasmin is overexpressed in WKY macrophages                                                                                                                                                                                                          | [430]      |
| Glomerulonephritis ( <i>Crgn1</i> ) | <i>Fcgr3-rs</i> **<br>Possibly <i>Fcgr2a</i> (RGD)<br>13, 91.15Mb | Lupus nephritis | <i>FCGR3B</i><br>1q23.3 | <b>Positional identification of the loss of a <i>Fcgr3</i> paralogue (named <i>Fcgr3-rs</i>; possibly <i>Fcgr2a</i>) as a determinant of glomerulonephritis in WKY rats; expressing <i>Fcgr3-rs</i> in primary WKY macrophages results in low levels of phagocytosis; in humans, association found between low copy number of <i>FCGR3B</i> and lupus nephritis</b> | [431, 432] |
| Glomerulonephr                      | <i>Jund</i> **                                                    | -               | -                       | Localization of a QTL and genome-wide gene expression                                                                                                                                                                                                                                                                                                               | [433]      |



|                         |                                            |       |                       |                                                                                                                                                                                                                                                      |           |
|-------------------------|--------------------------------------------|-------|-----------------------|------------------------------------------------------------------------------------------------------------------------------------------------------------------------------------------------------------------------------------------------------|-----------|
| i-tis ( <i>Crn2</i> )   | 16, 20.48 Mb                               |       |                       | studies associated upregulation of <i>Jund</i> (due to a SNP in the promoter region) with glomerulonephritis; <i>Jund</i> KO in primary macrophages led to reduced macrophage activity                                                               |           |
| Glomerulonephr<br>i-tis | <i>Kcnn4</i> **<br>1, 81.22 Mb             | -     | -                     | Genome-wide eQTL mapping in macrophages from a segregating population led to the identification of <i>Kcnn4</i> as a key regulator of macrophage multinucleation and inflammatory diseases; <i>Kcnn4</i> is trans-regulated by <i>Trem2</i>          | [434]     |
| Glucose<br>homeostasis  | <i>Tbc1d1</i> <sup>T</sup><br>14, 45.60 Mb | CAKUT | <i>TBC1D1</i><br>4p14 | The SD KO mutant shows impaired contraction-induced sarcolemmal glucose transporter 4 redistribution, impaired glucose-tolerance and reduced pancreatic beta-cell mass                                                                               | [435-437] |
| Heart failure           | <i>Ephx2</i> **<br>15, 42.76 Mb            | -     | -                     | Localization of a QTL and genome-wide gene expression studies associated upregulation of <i>Ephx2</i> (due to a sequence variation in the promoter region) with heart failure susceptibility; gene ablation in the mouse protects from heart failure | [438]     |

|                                                         |                                             |             |                                |                                                                                                                                                                                                       |              |
|---------------------------------------------------------|---------------------------------------------|-------------|--------------------------------|-------------------------------------------------------------------------------------------------------------------------------------------------------------------------------------------------------|--------------|
| Herpes simplex encephalitis susceptibility: <i>Hse1</i> | <i>Calcr</i> *<br>4q13, 28.53 Mb            | -           | -                              | Differences in expression level of <i>Calcr</i> mRNA and in protein localization between the susceptible (DA) and resistant (PVG) strains                                                             | [439]        |
| Hippocampus function                                    | <i>Trpm4</i> <sup>T</sup><br>1, 101.29 Mb   | -           | -                              | The SD KO mutant shows a distinct deficit in spatial working and spatial memory as well as changes in various target regions of the right dorsal hippocampus upon stimulation of Schaffer collaterals | [440, 441]   |
| <b>Inflammation: Irf7-driven inflammatory network</b>   | <b><i>Gpr183</i>**<br/>15q15, 108.36 Mb</b> | <b>IDDM</b> | <b><i>GPR183</i><br/>13q32</b> | <b>Gene expression analyses and QTL mapping done in the rat; the results were translated to the human, identifying <i>GPR183</i> (=EBI2) as an T1DM susceptibility gene</b>                           | <b>[442]</b> |
| Inflammation: TNF induction                             | <i>Tlr4</i> <sup>T</sup><br>5, 86.69 Mb     | -           | -                              | The Wistar KO rat shows markedly reduced TNF induction upon liposaccharide challenge; see also above, Diabetes, type 2                                                                                | [443]        |

|                                       |                                             |                                                  |                           |                                                                                                                                                                                                                                                                                         |       |
|---------------------------------------|---------------------------------------------|--------------------------------------------------|---------------------------|-----------------------------------------------------------------------------------------------------------------------------------------------------------------------------------------------------------------------------------------------------------------------------------------|-------|
| Insulin resistance                    | <i>Pparg</i> **                             |                                                  |                           | See above, Fat mass                                                                                                                                                                                                                                                                     |       |
| Macrophage development                | <i>Csf1r</i> <sup>T</sup><br>18, 56.41 Mb   | ALSP                                             | <i>CSF1R</i><br>5q32      | The DA KO mutant shows multiple abnormalities: loss of macrophages in several organs, osteopetrosis, infertility, lack of tooth eruption, loss of visceral fat, absence of microglia (see <i>tootless</i> for mutation in <i>Csf1</i> )                                                 | [48]  |
| Macrophage function                   | <i>Cyp2j4</i> <sup>T</sup><br>5, 119.55 Mb  | -                                                | -                         | The WKY KO mutant macrophages show a profibrotic transcriptome suggesting that macrophage epoxygenase could play a role in fibrotic disorders with inflammatory component                                                                                                               | [444] |
| Metabolic syndrome ( <i>Niddm30</i> ) | <i>Camk2n1</i> <sup>T</sup><br>5, 156.88 Mb | Elevated risk of T2DM and coronary heart disease | <i>CAMK2N1</i><br>1p36.12 | The gene was a solid candidate gene for metabolic syndrome (blood pressure, diabetes, left ventricle weight); the SHR KO rat shows reduced cardiorenal Camk2 activity, lower blood pressure, lower left ventricular mass, decreased visceral fat mass and increased insulin sensitivity | [445] |

|                    |                                           |                                            |                       |                                                                                                                                                                                                                                                   |       |
|--------------------|-------------------------------------------|--------------------------------------------|-----------------------|---------------------------------------------------------------------------------------------------------------------------------------------------------------------------------------------------------------------------------------------------|-------|
| Metabolic syndrome | <i>Cfb</i> <sup>T</sup><br>20p12, 4.54 Mb | NIDDM and components of metabolic syndrome | <i>CFB</i><br>6p21.33 | The SHR KO rat shows improved glucose tolerance and adipose distribution, lower blood pressure, marked changes in gene expression and reduced left ventricular mass; several human SNPs in <i>CFB</i> were associated with cardiometabolic traits | [397] |
| Metabolic syndrome | <i>Folh1</i> **<br>1, 150.32 Mb           | -                                          | -                     | Positional identification of the gene; the SHR allele shows 2 missense mutations; an SHR congenic line harboring the BN <i>Folh1</i> allele shows decreased glucose and insulin concentrations                                                    | [446] |
| Metabolic syndrome | <i>Folr1</i> ***<br>1, 166.93 Mb          | -                                          | -                     | Positional identification of the gene, the promoter of which is mutated in the SHR; transgenic rescue experiments ameliorate most of the metabolic disturbances, probably linked to folate deficiency                                             | [447] |
| Metabolic syndrome | <i>Gja8</i> **<br>2, 199.05 Mb            | -                                          | -                     | The <i>Gja8</i> mutation present in the SHR-Dca strain causes dominant cataract (see above); in the heterozygous form this                                                                                                                        | [448] |

|                    |                                                   |                             |                      |                                                                                                                                                                                                                                                               |       |
|--------------------|---------------------------------------------------|-----------------------------|----------------------|---------------------------------------------------------------------------------------------------------------------------------------------------------------------------------------------------------------------------------------------------------------|-------|
|                    |                                                   |                             |                      | mutation results in increased concentration of triacyl-glycerols, decrease of cholesterol and elevation of inflammatory cytokines                                                                                                                             |       |
| Metabolic syndrome | <i>Mt-Nd2, Mt-Nd4, Mt-Nd5</i>                     | -                           | -                    | The conplastic rat SHR- <i>mt</i> <sup>LEW</sup> only differs from SHR in the sequence of these 3 mitochondrial genes and exhibits increased serum fatty acid levels and resistance to insulin stimulated incorporation of glucose into adipose tissue lipids | [449] |
| Metabolic syndrome | <i>Wars2</i> <sup>***</sup><br>2q34,<br>201.17 Mb | Cardio-metabolic phenotypes | <i>WARS2</i><br>1p12 | Positional identification of the gene; the SHR allele is mutated (and causes reduced angiogenesis – see above); transgenic SHR- <i>Wars2</i> rats exhibit increased glucose oxidation and incorporation into brown adipose tissue, as well as lower adiposity | [450] |
| Metabolic syndrome | <i>Zbtb16</i> <sup>T</sup><br>8, 51.57 Mb         | -                           | -                    | The heterozygous SHR KO rat exhibits lower serum and triglycerides and cholesterol as well as increased sensitivity to adipose and muscle tissue to insulin action                                                                                            | [372] |

|                             |                                                |          |             |                                                                                                                                                                                                                                                                                                           |            |
|-----------------------------|------------------------------------------------|----------|-------------|-----------------------------------------------------------------------------------------------------------------------------------------------------------------------------------------------------------------------------------------------------------------------------------------------------------|------------|
| Metabolic syndrome: obesity | <i>Aqp11</i> **<br>1, 162.70 Mb                | -        | -           | Positional identification of the gene in combination with expression QTL mapping; the LH rat allele is mutated in the 3' UTR and the 5' upstream region; downregulation of <i>Aqp11</i> is associated with obesity in LH rats; aquaporins are now considered to be involved in adipose tissue homeostasis | [451]      |
| Metabolism                  | <i>Apoa4</i> <sup>T</sup><br>8q23,<br>50.54 Mb | -        | -           | The SD KO mutant shows improved glucose tolerance and altered expression of genes expressed in the liver, with enhanced glycolysis, attenuated gluconeogenesis and elevated de novo lipogenesis                                                                                                           | [452]      |
| Metabolism                  | <i>Esr1</i> <sup>T</sup><br>1q12, 41.19 Mb     | -        | -           | The male SD KO liver shows altered expression of genes involved in carbohydrate and lipid metabolism; see also above, Monogenic Traits, Infertility                                                                                                                                                       | [453]      |
| Metabolism                  | <i>Pmch</i> <sup>ENU</sup><br>7, 28.65 Mb      | -        | -           | The Wistar KO rat is lean, hypophagic, osteoporotic and has a low adipose mass resulting from lower adipocyte cell size                                                                                                                                                                                   | [454, 455] |
| Metabolism                  | <i>Tspo</i> <sup>T</sup>                       | Anxiety- | <i>TSPO</i> | The SD KO rat displays impaired ACTH-induced steroid                                                                                                                                                                                                                                                      | [456]      |

|                                         |                                            |                   |   |                                                                                                                                                                                                                                                          |       |
|-----------------------------------------|--------------------------------------------|-------------------|---|----------------------------------------------------------------------------------------------------------------------------------------------------------------------------------------------------------------------------------------------------------|-------|
| (steroid synthesis)                     | 7, 124.46 Mb                               | related disorders |   | production and reduced circulating testosterone levels; in human a rare <i>TSPO</i> allele is associated with a reduced plasma cortisol rate of formation                                                                                                |       |
| Neuromyelitis optica spectrum disorders | <i>Cd59<sup>T</sup></i><br>3, 94.01 Mb     | -                 | - | The SD KO mutant shows no overt phenotype, except for mild hemolysis; however upon intracerebral administration of autoantibodies against astrocyte aquaporin 4, it shows marked neuromyelitis optica pathology including inflammation and demyelination | [457] |
| Non-alcoholic fatty liver disease       | <i>Pten<sup>T</sup></i><br>1, 251.42 Mb    | -                 | - | This study reports the somatic inactivation of <i>Pten</i> in the liver; the treated SD rats showed increased body weight and triglyceride level, with increased lipid accumulation in the liver                                                         | [458] |
| Pain                                    | <i>Scn9a<sup>T(5)</sup></i><br>3, 52.58 Mb | -                 | - | The SD KO <sup>(5)</sup> rat does not exhibit nociceptive pain responses in hot plate nor neuropathic pain responses following spinal nerve ligation, suggesting that inhibition of                                                                      | [459] |

|                             |                                           |   |   |                                                                                                                                                                                                                                                                                                     |            |
|-----------------------------|-------------------------------------------|---|---|-----------------------------------------------------------------------------------------------------------------------------------------------------------------------------------------------------------------------------------------------------------------------------------------------------|------------|
|                             |                                           |   |   | SCN9A in humans may reduce pain in neuropathic conditions                                                                                                                                                                                                                                           |            |
| Pain                        | <i>Trpv1</i> <sup>T</sup><br>10, 59.80 Mb | - | - | Neuroimaging experiments of SD KO and WT rats showed that capsaicin-induced pain activates neuronal circuitries involved in pain but also in emotion and memory in a TRPV1-dependent manner; this channel was independently shown to be dispensable for hypernatremia-induced vasopressin secretion | [460, 461] |
| Pain (visceral nociception) | <i>Trpc4</i> <sup>T</sup><br>2, 143.43 Mb | - | - | The F344 KO rat is tolerant to noxious chemical stimuli applied to the colon (the gene is also involved in Blood pressure control –PAH- and Behavior, drug addiction: see above)                                                                                                                    | [462]      |
| Pain processing             | <i>Ano3</i> <sup>T</sup><br>3, 108.44 Mb  | - | - | The F344 KO rat shows increased neuronal activity and increased thermal and mechanical sensitivity                                                                                                                                                                                                  | [463]      |
| Proteinuria                 | <i>Actr3</i> <sup>**</sup>                | - | - | Positional identification of the gene: sole gene mutated in                                                                                                                                                                                                                                         | [464]      |



|                            |                                            |                |                                               |                                                                                                                                                                                   |       |
|----------------------------|--------------------------------------------|----------------|-----------------------------------------------|-----------------------------------------------------------------------------------------------------------------------------------------------------------------------------------|-------|
| <i>(Pur1)</i>              | 13, 46.81Mb                                |                |                                               | the <i>Pur1</i> interval of the BUF/Mna rat (a model of glomerulosclerosis)                                                                                                       |       |
| Proteinuria                | <i>Agtrap</i> <sup>T</sup><br>5, 168.55 Mb | Renal function | <i>AGTRAP-</i><br><i>PLOD1</i><br>locus; 1p36 | The SS KO rat shows decreased urinary protein excretion;<br>the human locus had been identified in GWAS                                                                           | [32]  |
| Proteinuria                | <i>Clcn6</i> <sup>T</sup><br>5, 168.47Mb   | Renal function | <i>AGTRAP-</i><br><i>PLOD1</i><br>locus; 1p36 | The SS KO rat shows decreased urinary protein excretion;<br>the human locus had been identified in GWAS                                                                           | [32]  |
| Proteinuria                | <i>Mthfr</i> <sup>T</sup><br>5, 168.50Mb   | Renal function | <i>AGTRAP-</i><br><i>PLOD1</i><br>locus; 1p36 | The SS KO rat shows increased urinary protein excretion;<br>the human locus had been identified in GWAS and <i>MTHFR</i><br>could be linked to blood pressure and renal phenotype | [32]  |
| Proteinuria                | <i>Plod1</i> <sup>T</sup><br>5, 168.38Mb   | Renal function | <i>AGTRAP-</i><br><i>PLOD1</i><br>locus; 1p36 | The SS KO rat shows increased urinary protein excretion;<br>the human locus had been identified in GWAS                                                                           | [32]  |
| Proteinuria ( <i>Rf2</i> ) | <i>Rab38</i> <sup>***, T</sup>             | -              | -                                             | Natural KO in FHH; transgenesis in FHH and targeted KO                                                                                                                            | [465] |

|                                              |                                        |                |                                    |                                                                                                                                                                                                                                                                               |            |
|----------------------------------------------|----------------------------------------|----------------|------------------------------------|-------------------------------------------------------------------------------------------------------------------------------------------------------------------------------------------------------------------------------------------------------------------------------|------------|
|                                              | 1, 152.07 Mb                           |                |                                    | in a FHH.BN congenic demonstrated the role of <i>Rab38</i> in protein excretion                                                                                                                                                                                               |            |
| Proteinuria and kidney damage                | <i>Add3</i> ****<br>1q55,<br>273.85 Mb | -              | -                                  | Positional identification and sequencing of the FHH gene revealed a deleterious mutation; knockout and transgenesis experiments confirmed the causal role of the mutation                                                                                                     | [466, 467] |
| Proteinuria and kidney damage ( <i>Rf4</i> ) | <i>Shroom3</i> **<br>14, 16.62 Mb      | Renal function | <i>SHROOM3</i><br>(GWAS)<br>4q21.1 | Congenic mapping and sequence analysis in rats suggested <i>Shroom3</i> was a strong positional candidate gene; variants disrupting the actin-binding domain of <i>SHROOM3</i> may cause podocyte effacement and impairment of the glomerular filtration barrier in zebrafish | [468]      |
| Proteinuria and kidney damage                | <i>Tgfb</i> <sup>T</sup><br>1, 83.74Mb | -              | -                                  | Heterozygous KO of <i>Tgfb</i> protects SS rats against high salt-induced renal injury                                                                                                                                                                                        | [469]      |
| Proteinuria and kidney damage                | <i>Tmem63c</i> *<br>6, 111.04 Mb       | -              | -                                  | Positional identification of the gene, which shows differential glomerular expression; the susceptible strain (MWF) also shows a nephron deficit; patients with focal                                                                                                         | [470]      |

|                                              |                                           |                                   |                            |                                                                                                                                                                                                                                                                                                                               |              |
|----------------------------------------------|-------------------------------------------|-----------------------------------|----------------------------|-------------------------------------------------------------------------------------------------------------------------------------------------------------------------------------------------------------------------------------------------------------------------------------------------------------------------------|--------------|
|                                              |                                           |                                   |                            | segmental glomerulosclerosis exhibit loss of glomerular <i>TMEM63C</i> expression                                                                                                                                                                                                                                             |              |
| <b>Proteinuria and kidney damage (Pur7?)</b> | <i>Arhgef11</i> **<br>2, 206.39Mb         | <b>Glomerular filtration rate</b> | <b>1q21</b>                | <b>Positional identification of the gene; allelic variants are differentially expressed in SS, SHR and congenic rats</b>                                                                                                                                                                                                      | <b>[471]</b> |
| <b>Proteinuria and kidney disease (Rf1)</b>  | <i>Sorcs1</i> **T<br>1q, 277.40Mb         | <b>Kidney disease</b>             | <i>SORCS1</i><br>10q23-q25 | The <i>Rf1</i> interval was narrowed to a single gene, <i>Sorcs1</i> , which only shows polymorphisms in non-coding regions; <i>Sorcs1</i> KO in the consomic FHH-1 <sup>BN</sup> causes increased proteinuria and impairment of albumin transport; in humans, association was found between <i>SORCS1</i> and kidney disease | <b>[472]</b> |
| QT-interval                                  | <i>Rffl-lnc1</i> ***                      |                                   |                            | See above, Blood pressure and QT-interval                                                                                                                                                                                                                                                                                     | [24]         |
| Renal injury                                 | <i>Nr4a1</i> <sup>T</sup><br>7, 142.90 Mb | -                                 | -                          | The FHH KO rat shows early onset of kidney injury and progressive decline in kidney function resulting from                                                                                                                                                                                                                   | [473]        |

|                              |                                              |   |   |                                                                                                                                                                                                                                                 |       |
|------------------------------|----------------------------------------------|---|---|-------------------------------------------------------------------------------------------------------------------------------------------------------------------------------------------------------------------------------------------------|-------|
|                              |                                              |   |   | macrophage-mediated enhanced inflammatory processes; the gene is also involved in dyskinesia in an experimental Parkinson disease model (see above)                                                                                             |       |
| Renal injury                 | <i>Serpinc1</i> <sup>T</sup><br>13, 78.81 Mb | - | - | Patients with low SERPINC1 activities present a higher risk of developing AKI after cardiac surgery; the heterozygous congenic SS.BN KO rat shows increased renal injury after renal ischemia/reperfusion                                       | [474] |
| Rheumatoid factor production | <i>Igl</i> **<br>11q23                       | - | - | Analysis of congenic and advanced intercrossed rats showed that the <i>Igl</i> locus controls rheumatoid factor production and allergic bronchitis                                                                                              | [475] |
| Stroke                       | <i>Igh</i> *<br>6, ~138 Mb                   | - | - | Congenic substitution of the SHRSP <i>Igh</i> locus with the corresponding haplotype from SHR (stroke-resistant) markedly reduced cerebrovascular disease, as well as the serum levels of autoantibodies to key cerebrovascular stress proteins | [476] |

|                        |                                              |        |                          |                                                                                                                                                                                                                                                                                                                                                  |            |
|------------------------|----------------------------------------------|--------|--------------------------|--------------------------------------------------------------------------------------------------------------------------------------------------------------------------------------------------------------------------------------------------------------------------------------------------------------------------------------------------|------------|
| Stroke ( <i>Str1</i> ) | <i>Ndufc2</i> <sup>*,T</sup><br>1, 162.37 Mb | Stroke | <i>NDUFC2</i><br>11q14.1 | Positional identification of the gene and differential expression study: <i>Ndufc2</i> is down-regulated in SHRSP (no sequence difference between SHRSP and SHRSR); the heterozygous KO SHRSR rat shows stroke occurrence and renal abnormalities, similarly to the SHRSP rat; in humans, association was found between <i>NDUFC2</i> and stroke | [26, 27]   |
| Stroke ( <i>Str2</i> ) | <i>Nppa</i> <sup>**</sup><br>5, 165.81 Mb    | Stroke | <i>NPPA</i><br>1p36.21   | Positional identification of the gene; altered sequence and expression of <i>Nppa</i> in SHRSP rats; in humans, association was found between <i>NPPA</i> and stroke                                                                                                                                                                             | [477, 478] |
| T-cell differentiation | <i>Pon1</i> <sup>T</sup><br>4, 30.25 Mb      | -      | -                        | The SD KO rat shows a decrease in CD4 <sup>+</sup> , CD8 <sup>+</sup> and double-positive T-cells; PON1 prevents excessive apoptosis by inhibiting activation of the p38 signaling pathway                                                                                                                                                       | [479]      |
| T-cell differentiation | <i>Tap2</i> <sup>**</sup><br>20, 3.99 Mb     | -      | -                        | Positional identification of <i>Tap2</i> and <i>RT1-A</i> , which interact with one another and control CD4:CD8 ratio and MHC class                                                                                                                                                                                                              | [480]      |

|                  |                                           |   |   |                                                                                                                                                                                                                                                                                                                                  |            |
|------------------|-------------------------------------------|---|---|----------------------------------------------------------------------------------------------------------------------------------------------------------------------------------------------------------------------------------------------------------------------------------------------------------------------------------|------------|
|                  | + <i>RT1-A</i> **<br>20, ?Mb              |   |   | expression                                                                                                                                                                                                                                                                                                                       |            |
| Toxicity         | <i>Ahr</i> <sup>T</sup><br>6, 54.97 Mb    | - | - | The SD KO mutant shows renal pathology and lack of responses to dioxin exposure ( <i>Ahr</i> KO results in distinct phenotypes in mouse and rat)                                                                                                                                                                                 | [481]      |
| Toxicity         | <i>Nr1i2</i> <sup>T</sup><br>2, 65.02 Mb  | - | - | An F344 KO mutant does not show the increase in NADPH-cytochrome P450 oxidoreductase protein and activity upon dexamethasone treatment; on the other hand, unlike wild-type rats, the SD KO rat fed diet containing pregnenolone-16alpha-carbonitrile (a non- genotoxic carcinogen) does not show increased thyroid gland weight | [482, 483] |
| Toxicity (liver) | <i>Nr1i3</i> <sup>T</sup><br>13, 89.59 Mb | - | - | Unlike wild-type rats, the SD KO rat fed diet containing sodium phenobarbital (a non-genotoxic carcinogen) does not show increased liver weight, hepatocyte replicative DNA synthesis and induction of cytochrome P450 enzymes                                                                                                   | [483]      |

|                                  |                                            |         |                      |                                                                                                                                                                                                          |       |
|----------------------------------|--------------------------------------------|---------|----------------------|----------------------------------------------------------------------------------------------------------------------------------------------------------------------------------------------------------|-------|
| Vascular function                | <i>Mc4r</i> <sup>ENU</sup><br>18, 62.61 Mb | Obesity | <i>MC4R</i><br>18q22 | The MSH6 KO rat is obese (see above) and show bradycardia and increased sympathetic tone to the vasculature                                                                                              | [484] |
| Vascular function                | <i>Nfe2l2</i> <sup>T</sup><br>3, 623.50 Mb | -       | -                    | The SD KO rat shows abnormalities in endothelium-dependent vasodilation and in microvessel density ( <i>Nfe2l2</i> also controls aflatoxin B1 toxicity: see above)                                       | [485] |
| Vascular function (vasodilation) | <i>Sod3</i> <sup>ENU</sup><br>14, 60.96 Mb | -       | -                    | Missense mutation in the SS rat with deleterious effects on aortic vascular reactivity, but protective effects in mesenteric arteries; see also above, Chronic kidney disease                            | [486] |
| Vascular tone and nephropathy    | <i>Shc1</i> <sup>T</sup><br>2, 188.75 Mb   | -       | -                    | The SS rat overexpresses <i>Shc1</i> , a feature linked to hypertension-induced increased renal damage; <i>Shc1</i> KO restores renal microvascular responses and mitigates glomerular damage in SS rats | [487] |

185

186 (1) In forward genetic studies, the role of the causative genes is considered proven when complementation, mutation recovery, gene disruption or  
187 transgenesis was performed successfully (\*\*\*) ; when these tests are lacking, the role of the gene can be either solid (\*\*) (polymorphisms analysed in

188 several contrasting strains, genetic linkage in a cross, or translation to genetic association in the human), or suggestive only (\*) (for instance,  
189 polymorphism analysed in 2 contrasting strains only). Genes inactivated by ENU-driven target-selected mutagenesis are labeled as <sup>ENU</sup>. Targeted  
190 mutations (in general, KO rats) are labelled as <sup>T</sup>.

191 <sup>(2)</sup> The human gene is indicated only when it has been implicated in the trait or diseases analysed in the rat.

192 <sup>(3)</sup> The gene positions are based on the data available at the NCBI ([www.ncbi.nlm.nih.gov/](http://www.ncbi.nlm.nih.gov/)), except those of the *Lta-Ncr3* region, derived from [309]; in  
193 the case of the rat, the cytogenetic position is indicated only when it was determined by *in situ* hybridization.

194 <sup>(4)</sup> The genomic scan of replicated high- and low-alcohol-drinking lines revealed signature of selection (excessive differentiation in the genomic  
195 architecture between lines) in 930 genes [295]; in the above table, only those genes residing in previously identified QTLs are quoted.

196 <sup>(5)</sup> This mutant is in fact a knock-in mutant carrying a human insertion that, unexpectedly, was shown to be spliced out upon transcription, resulting in  
197 the generation of a premature stop codon and thus in a loss-of-function allele (except in the olfactory bulb).

#### 198 Abbreviations:

199 1) Genes: *Abcb1a*: ATP-binding cassette, sub-family B (MDR/TAP), member 1A (= *Mdr1a*, Multidrug resistance 1a/P-glycoprotein); *Abcc2*: ATP-  
200 binding cassette, sub-family C (CFTR/MRP), member 2 (= *Moat*=*Mrp2*); *Abcc6*: ATP binding cassette subfamily C member 6; *Abcc8*: ATP binding  
201 cassette subfamily C member 8 (= *Sur1*, Sulfonylurea receptor 1); *Abcg2*: ATP-binding cassette, sub-family G (WHITE), member 2 (Junior blood group)  
202 (= *Bcrp*, Breast cancer resistance protein); *Abcg5*: ATP-binding cassette, sub-family G (WHITE), member 5; *ABCG8*: ATP-binding cassette, sub-family  
203 G (WHITE), member 8; *Actr3*: ARP3 actin-related protein 3 homolog (yeast); *Adamts16*: Disintegrin and metallopeptidase with thrombospondin type 1



204 motif, 16; *Adcyap1r1*: Adenylate cyclase activating polypeptide receptor type 1; *Add1*: Adducing 1 (alpha); *Add3*: Adducing 3 (gamma); *Agtr1a*:  
205 Angiotensin II receptor, type 1a; *Adgrl3*: Adhesion G protein-coupled receptor L3 (= *Lphn3*); *Adra2a*: Adrenoceptor alpha 2A; *Ahr*: Aryl hydrocarbon  
206 receptor; *Angptl8*: Angiopoietin-like 8; *Anks6*: Ankyrin repeat and sterile alpha motif domain containing 6 (= *Pkdr1*, *SamCystin*); *Ano3*: Anoctamin 3,  
207 calcium activated chloride channel (= *Tmem16c*); *Apc*: Adenomatous polyposis coli; *Aplec*: Antigen-presenting lectin-like receptor gene complex  
208 (= *Dcir3*); *Apoa4*: Apolipoprotein A4; *ApoE*: Apolipoprotein E; *Aqp4*: Aquaporin 4; *Aqp11*: Aquaporin 11; *Ar*: Androgen receptor; *Arntl*: Aryl  
209 hydrocarbon receptor nuclear translocator-like (= *Bmal1*); *Ar*: Androgen receptor; *Arhgef11*: Rho guanine nucleotide exchange factor (GEF) 11; *Arsb*:  
210 Arylsulfatase B; *Asip*: Agouti signaling protein; *Aspa*: Aspartoacylase; *Atm*: Ataxia-telangiectasia mutated serine/threonine kinase; *Atp7b*: ATPase,  
211 Cu<sup>++</sup> transporting, beta polypeptide; *Atrn*: Attractin; *Avp*: Arginin vasopressin; *Bace1*: Beta-secretase 1; *Bckdk*: Branched chain ketoacid  
212 dehydrogenase kinase; *Bdnf*: Brain-derived neurotrophic factor; *Bglap*: Bone gamma- carboxyglutamate protein (=osteocalcin); *Brca2*: BRCA2, DNA  
213 repair associated; *Bscl2*: BSCL2 lipid droplet biogenesis associated, seipin; *CIITA*: Class II, major histocompatibility complex, transactivator (= *Mhc2ta*);  
214 *C3*: Complement C3; *Cacna1a*: Calcium channel voltage-dependent subunit alpha 1A; *Cacna1c*: Calcium voltage-gated channel subunit alpha1 C;  
215 *Cacna1f*: Calcium voltage-gated channel subunit alpha1 F; *Cacna1h*: Calcium voltage-gated channel subunit alpha1 H; *Calcr*: Calcitonin receptor;  
216 *Camk2*: Calcium/calmodulin-dependent protein kinase II; *Camk2n1*: Calcium/calmodulin-dependent protein kinase II inhibitor 1; *Cav3*: Caveolin 3;  
217 *Cblb*: Cbl proto-oncogene B; *Ccdc39*: Coiled-coil containing domain 39; *Ccdc85c*: Coiled-coil containing domain 85C; *Cckar*: Cholecystokinin A  
218 receptor; *Cd8a*: Cd8A molecule; *Cd36*: CD36 molecule, fatty acid translocase; *Cd59*: Cd59 molecule; *Cd247*: CD247 molecule (CD3 zeta chain);  
219 *Cdh13*: Cadherin 13; *Cdkn1b*: Cyclin dependent kinase inhibitor 1B; *Cfb*: complement factor B; *Cftr*: Cystic fibrosis transmembrane conductance

220 regulator; *Chrm3*: Cholinergic receptor, muscarinic 3; *Cit*: Citron rho-interacting serine/threonine kinase; *CLEC4A*: C-type lectin domain family 4,  
221 member A (=DCIR); *Cntnap2*: Contactin associated protein like 2; *Centrob*: Centrobin, centrosomal BRCA2 interacting protein; *Cp*: Ceruloplasmin;  
222 *Cplx1*: Complexin 1; *Crb1*: Crumbs cell polarity complex component 1; *Crhr2*: Corticotropin releasing hormone receptor 2; *Cryba1*: Crystallin beta  
223 A1; *Crygd*: Crystallin gamma D; *Csfl*: Colony stimulating factor 1; *Csflr*: Colony stimulating factor 1 receptor; *Ctnnd2*: Catenin (cadherin-associated  
224 protein), delta 2; *Ctns*: Cystinosin, lysosomal cystin transporter; *Cyba*: Cytochrome b-245 alpha chain; *Cyp2c11*: Cytochrome P450, family 2, subfamily  
225 c, polypeptide 11; *Cyp2e1*: Cytochrome P450, family 2, subfamily e, polypeptide 1; *Cyp2j4*: Cytochrome P450, family 2, subfamily j, polypeptide 4  
226 (human *CYP2J2* ortholog); *Cyp3a1/2*: Cytochrome P450, family 3, subfamily a, polypeptide 1/2; *Cyp4f18*: Cytochrome P450, family 4, subfamily f,  
227 polypeptide 18; *Cyp11b1*: Cytochrome P450, family 11, subfamily b, polypeptide 1; *Cyp17a1*: Cytochrome P450 family 17, subfamily a, polypeptide  
228 1 ; *Ddah1*: Dimethylarginine dimethylaminohydrolase 1; *Defb23/26/42*: Defensin beta 23/26/42; *Depdc5*: DEP domain containing 5; *Dhh*: Desert  
229 hedgehog; *Dmd*: Dystrophin; *Disc1*: Disc1 scaffold protein; *Dnd1*: DND microRNA-mediated repression inhibitor 1; *Dnmt1*: DNA methyltransferase 1;  
230 *Dock8*: Deducator of cytokinesis 8; *Dopey1*: Dopey family member 1; *Dpp4*: Dipeptidyl peptidase 4; *Drd1*: Dopamine receptor D1; *Dsg4*: Desmoglein  
231 4; *Dusp5*: Dual specificity phosphatase 5; *Endog*: endonuclease G; *Ephx2*: Epoxide hydrolase; *Ercc6*: ERCC excision repair 6, chromatin remodelling  
232 factor (=Csb: Cockayne syndrome B); *Esr1*: Estrogen receptor 1; *Esr2*: Estrogen receptor 2; *Edaradd*: EDAR-associated death domain; *Ednrb*:  
233 Endothelin receptor type B ; *F8*: Coagulation factor F8; *Fah*: Fumarylacetoacetate hydrolase; *Fam129c*: Family with sequence similarity 129, member  
234 C; *Fbxo10*: F-box protein 10; *Fcgr2a*: Fc fragment of IgG receptor IIa; *FCGR3B*: Fc fragment of IgG receptor IIIb ; *Fcgr3-rs*: Fc fragment of IgG  
235 receptor III related sequence; *Fdft1*: Farnesyl diphosphate farnesyltransferase1; *Fh*: fumarate hydratase; *Fkbp5*: FKBP prolyl isomerase 5; *Fln*:

236 Folliculin (=Bhd, Birt-Hogg-Dube syndrome homolog); *Fmr1*: Fragile X mental retardation 1; *Folh1*: Folate hydrolase 1; *Folr1*: Folate receptor 1;  
237 *Foxn1*: Forkhead box N1; *Frem2*: FRAS1 related extracellular matrix protein 2; *Frmpl1*: FERM and PDZ domain containing 1; *Fry*: Furry homolog  
238 (Drosophila); *Gdnf*: Glial cell derived neurotrophic factor; *Gh*: growth hormone; *Ghsr*: Growth hormone secretagogue (ghrelin) receptor; *Gimap5*:  
239 GTPase, IMAP family member 5 (=Ian5); *Git2*: GIT ArfGAP 2; *Gja3*: Gap junction protein, alpha 3; *Gja8*: Gap junction protein, alpha 8 (=Cox50);  
240 *Gla*: Galactosidase alpha; *Gnal*: G protein subunit alpha L; *Golgb1*: Golgin B1; *Gper1*: G protein-coupled estrogen receptor 1; *Gpr183*: G protein-  
241 coupled receptor 183 (=Ebi2); *Grin2a*: Glutamate ionotropic receptor NMDA type subunit 2A; *Grm2*: Glutamate metabotropic receptor 2 (=mGlur2);  
242 *Hcn1*: Hyperpolarization activated cyclic nucleotide gated potassium channel 1; *Hip1*: Huntington-interacting protein 1; *Hmx1*: H6 family homeobox 1;  
243 *Hr*: Hair growth associated; *Hsd11b2*: Hydroxysteroid 11-beta dehydrogenase 2 ; *Htr7*: 5-hydroxytryptamine (serotonin) receptor 7, adenylate cyclase-  
244 coupled; *Igh*: Immunoglobulin heavy chain locus; *Igl*: Immunoglobulin lambda chain complex; *Il1rl2*: Interleukin 1 receptor like 2 (=Il36r); *Il2rg*:  
245 Interleukin 2 receptor, gamma; *Il21r*: Interleukin 21 receptor; *Il22ra2*: Interleukin 22 receptor, alpha 2; *Inpp1l*: Inositol polyphosphate phosphatase like  
246 1; *Isca1*: Iron-sulfur complex assembly 1; *Jund*: JunD proto-oncogene, AP-1 transcription factor subunit; *Kcna1*: Potassium voltage-gated channel,  
247 shaker-related subfamily, member 1; *Kcnj1*: Potassium voltage-gated channel subfamily J member 1 (=Romk); *Kcnj10*: Potassium voltage-gated  
248 channel subfamily J member 10 (=Kir4.1); *Kcnj16*: Potassium voltage-gated channel subfamily J member 16; *Kncq1*: Potassium voltage-gated channel,  
249 KQT-like subfamily, member 1; *Kcnk3*: Potassium two pore domain channel subfamily K member 3; *Kcnn2*: Potassium calcium-activated channel  
250 subfamily N member 2; *Kcnn4*: Potassium calcium-activated channel subfamily N member 4; *Kiss1*: KISS-1 metastasis-suppressor (kisspeptin); *Kit*: v-  
251 kit Hardy-Zuckerman 4 feline sarcoma viral oncogene homolog; *Krt@*: Cytokeratin gene locus (type II); *Krt71*: Keratin 71; *L1cam*: L1 cell adhesion

252 molecule; *Lamp2*: Lysosomal associated membrane protein 2; *Ldlr*: Low density lipoprotein receptor; *Lep*: Leptin; *Lepr*: Leptin receptor; *Lgil*: Leucine  
253 rich glioma inactivated 1; *Lipa*: Lipase A, lysosomal acid, cholesterol esterase; *Lmx1a*: LIM homeobox transcription factor 1, alpha; *Lpar1*:  
254 Lysophosphatidic acid receptor 1; *Lpin1*: Lipin 1 (phosphatidate phosphatase); *Lrp5*: LDL receptor related protein 5; *Lrrk2*: Leucine-rich repeat kinase  
255 2; *Lss*: Lanosterol synthase (2,3-oxidosqualene-lanosterol cyclase); *Lta*: Lymphotoxin alpha; *Ltb*: Lymphotoxin beta; *Lst1*: Leukocyte-specific transcript  
256 1; *Lyst*: Lysosomal trafficking regulator; *Mbd2*: Methyl CpG binding domain binding protein 2; *Mbp*: Myelin basic protein; *Mc4r*: Melanocortin 4  
257 receptor; *Mecp2*: Methyl-CpG binding protein 2 ; *Mertk*: MER proto-oncogene, tyrosine kinase; *Mip*: Major intrinsic protein of lens fiber; *Mir146b*  
258 (*5p*): Micro RNA 146b; *Mkx*: Mohawk homeobox; *Mrs2*: MRS2 magnesium transporter; *Msh6*: MutS homolog 6; *Mstn*: Myostatin; *Mt-Nd2*, *Mt-Nd4*,  
259 *Mt-Nd5*: Mitochondrial subunits Nd2, Nd4, Nd5 encoding the NAD dehydrogenase (complex I); *Muc1*: Mucin 1, cell surface associated; *Myo5a*: Myosin  
260 VA; *Myo7a*: Myosin VIIA; *Myo9b*: Myosin IXB; *Myo15a*: Myosin XVA; *Myl4*: Myosin, light chain 4; *Ncf1*: Neutrophil cytosolic factor 1 (encodes the  
261 47-kilodalton cytosolic subunit of neutrophil NADPH oxidase); *Ncf2*: Neutrophil cytosolic factor 2 (=p67phox; 7-kilodalton cytosolic subunit of  
262 neutrophil NADPH oxidase); *NCF4*: Neutrophil cytosolic factor 4, 40kDa; *Ncr3*: Natural cytotoxicity triggering receptor 3; *Ndufa4*: NADH  
263 dehydrogenase 1 alpha subcomplex 4; *Ndufc2*: NADH:ubiquinone oxidoreductase subunit C2; *Nek8*: NIMA-related kinase 8; *Nfe2l2*: Nuclear factor,  
264 erythroid 2 like 2 (=Nrf2); *Nlgn3*: Neuroligin-3; *Nlrp1*: NLR family, pyrin domain containing 1; *Nox4*: NADPH oxidase 4; *Nppa*: Natriuretic peptide A  
265 (=Anp); *Nppb*: Natriuretic peptide B (=Bnp); *Nppc*: Natriuretic peptide C (=Cnp); *Npy*: Neuropeptide Y; *Nr1i2*: Nuclear receptor subfamily 1 group I  
266 member 2 (=Pxr, Pregnane X receptor); *Nr1i3*: Nuclear receptor subfamily 1 group I member 3 (=Car, Constitutive androstane receptor); *Nr2f2*:  
267 Nuclear receptor subfamily 2 group F member 2; *Nr3c1*: Nuclear receptor subfamily 3 group C member 1 (=Gr, Glucocorticoid receptor); *Nrg1*:

268 Neuregulin 1; *Nur4a1*: Nuclear receptor subfamily 4 group A member 1 (=Nur77); *Oca2*: Oculocutaneous albinism II; *Ogdh*: Oxoglutarate  
269 dehydrogenase; *Ogn*: Osteoglycin; *Oprl1*: Opioid related nociceptin receptor 1 (nociceptin/orphanin FQ receptor); *P2rx7*: Purinergic receptor P2x7;  
270 *Pappa1*: Pappalysin 1; *Pappa2*: Pappalysin 2; *Park7*: Parkinson protein 7 (=Dj1); *Pax6*: Paired box 6; *Pcdh15*: Protocadherin 15; *Pde6b*:  
271 Phosphodiesterase 6B; *Phkg2*: Phosphorylase kinase, gamma 2 (testis); *Pgls*: 6-phosphogluconolactonase; *Phf24*: PHD finger protein 24; *Pi15*:  
272 *peptidase inhibitor 15*; *Pink1*: Pten induced putative kinase; *Pkhd1*: Polycystic kidney and hepatic disease 1 (autosomal recessive); *Plekha7*: Pleckstrin  
273 homology domain containing family A member 7; *Plekhm1*: Pleckstrin homology domain containing, family M (with RUN domain) member 1; *Plp1*:  
274 Proteolipid protein 1; *Pmch*: Pro-melanin-concentrating hormone; *Pon1*: Paraoxonase 1; *Ppp4r3b*: Protein phosphatase 4 regulatory subunit 3B  
275 (=Smek2); *Pparg*: Peroxisome proliferator activated receptor gamma; *Prdm14*: PR/SET domain 14; *Prdx2*: Peroxiredoxin 2; *Prkdc*: Protein kinase,  
276 DNA-activated, catalytic polypeptide; *Prkg2*: Protein kinase, cGMP-dependent, type II; *Prkn*: Parkin RBR E3 ubiquitin protein ligase (=Park2); *Prlhr*:  
277 Prolactin releasing hormone receptor (=Gpr10); *Prss8*: Protease, serine, 8; *Pten*: Phosphatase and tensin homolog; *Ptprk*: Protein tyrosine phosphatase,  
278 receptor type, K; *Rab38*: RAB38, member RAS oncogene family; *Rag1*: Recombination activating gene 1; *Rag2*: Recombination activating gene 2;  
279 *Rarres2*: Retinoic acid receptor responder 2 (=chemerin); *Rbm20*: RNA binding motif protein 20; *Rffl*: Ring finger and FYVE like domain containing  
280 E3 ubiquitin protein ligase (rififylin); *Rffl-lnc1*: *Rffl*-long non-coding RNA; *RT1-A*: RT1 class I, locus A; *RT1-Ba*: RT1 class II, locus Ba; *RT1-Bb*: RT1  
281 class II, locus Bb; *Reln*: Reelin; *Ren*: Renin; *Resp18*: Regulated endocrine-specific protein 18; *Rgma*: Repulsive guidance molecule BMP co-receptor a;  
282 *Rnaset2*: Ribonuclease T2; *Sbfl*: SET binding factor 1; *Scn1a*: Sodium channel, voltage-gated, type I, alpha subunit; *Scn9a*: Sodium voltage-gated  
283 channel alpha subunit 9 (=Nav 1.7); *Serpinc1*: Serpin family C member 1 (=antithrombin III); *Sh2b3*: SH2B adaptor protein 3 (=Lnk); *Shank2*: SH3 and

284 multiple ankyrin repeat domains 2; *Shank3*: SH3 and multiple ankyrin repeat domains 3; *Shc1*: SHC adaptor protein 1; *Shroom3*: Shroom family  
285 member 3; *Slc6a3*: Solute carrier family 6 member 3 (=DAT, dopamine transporter); *Slc6a4*: Solute carrier family 6 member 4 (= SERT, serotonin  
286 transporter); *Slc11a2*: Solute carrier family 11 (proton-coupled divalent metal ion transporter), member 2 (=Nramp2); *Slc22a18*: Solute carrier family  
287 22, member 18; *Slc39a12*: Solute carrier family 39 member 12 (zinc transporter ZIP12); *Slco1b2*: Solute carrier organic anion transporter family  
288 member 1B2; *SLCO1B3*: Solute carrier organic anion transporter family member 1B3; *Snca*: Synuclein alpha; *Sod3*: Superoxide dismutase 3,  
289 extracellular; *Sorcs1*: Sortilin-related VPS10 domain containing receptor 1; *Spata22*: Spermatogenesis associated 22; *Stim1*: Stromal interaction  
290 molecule 1; *Sv2a*: synaptic vesicle glycoprotein 2A; *Tap2*: Transporter 2, ATP-binding cassette, sub-family B (MDR/TAP); *Tbc1d1*: TBC1 domain  
291 family member 1; *Tbx6*: T-box 6; *Tfr2*: transferrin receptor 2; *Themis*: Thymocyte selection associated; *Tg*: Thyroglobulin; *Tlr4*: Toll-like receptor 4;  
292 *Tmem63c*: Transmembrane protein 63c; *Tmem67*: Transmembrane protein 67 (=meckelin, *Mks3*); *Tp53*: Tumor protein 53; *Tph2*: Tryptophan  
293 hydroxylase 2; *Tpcn2*: Two pore segment channel 2; *Trem2*: Triggering receptor expressed on myeloid cells 2 ; *Trpa1*: transient receptor potential  
294 cation channel, subfamily A, member 1; *Trpc4*: Transient receptor potential cation channel, subfamily C, member 4; *Trpc6*: Transient receptor potential  
295 cation channel subfamily C member 6; *Trpm4*: Transient receptor potential cation channel subfamily M member 4; *Trpv1*: Transient receptor potential  
296 cation channel subfamily V member 1; *Trpv3*: Transient receptor potential cation channel, subfamily V, member 3; *Trpv4*: Transient receptor potential  
297 cation channel subfamily V member 4; *Tsh*: Thyroid stimulating hormone receptor; *Tspo*: Translocator protein; *Tubb4a*: Tubulin beta 4A class Iva; *Tyr*:  
298 Tyrosinase; *Ubd*: Ubiquitin D (=Fat10); *Ube3a*: Ubiquitin protein ligase E3A; *Ugt1a1*: UDP glycosyltransferase 1 family, member A1; *Unc5c*: unc-5  
299 netrin receptor 5 (=Unc5h3); *Vav1*: Vav1 guanine nucleotide exchange factor; *Vkorc1*: Vitamin K epoxide reductase complex, subunit 1; *Wars2*:

300 Tryptophanyl tRNA synthetase 2, mitochondrial; *Wfs1*: Wolframin ER transmembrane glycoprotein; *Zbtb16*: Zinc finger and BTB domain containing  
301 16 (=Plzf)

302 2) Phenotypes and diseases: ADHD: Attention deficit hyperactivity disorder; ADLTE: Autosomal dominant lateral temporal lobe epilepsy; ADPKD:  
303 Autosomal dominant polycystic kidney disease; AKI: Acute kidney injury; ALSP: Adult-onset leukoencephalopathy with axonal spheroid and  
304 pigmented glia; AMD: Age-related macular degeneration; ARPKD: Autosomal recessive polycystic kidney disease; CAKUT: Congenital anomalies of  
305 the kidneys and the urinary tract; CDFE: Cortical dysplasia-focal epilepsy; CV: Cardiovascular; DJS: Dubin-Johnson syndrome; EA2: Episodic ataxia  
306 type 2; EAE: Experimental autoimmune encephalomyelitis; EAN: Experimental autoimmune neuritis; FHM1: Familial hemiplegic migraine type 1;  
307 HNPPC: Hereditary non-polyposis colorectal cancer; HPS: Hermansky-Pudlak syndrome; IBD: Inflammatory bowel disease; LVH: Left ventricular  
308 hypertrophy; LVM: left ventricular mass; PAH: Pulmonary artery hypertension; PD: Parkinson disease; PIA: Pristane-induced arthritis; PKHD1:  
309 Polycystic kidney and hepatic disease 1; RA: Rheumatoid arthritis; RV; Right ventricular; SAME: Syndrome of apparent mineralocorticoid excess;  
310 SCA6: Autosomal dominant spino-cerebellar ataxia 6; T1DM: Type 1 diabetes mellitus (Insulin-dependent diabetes mellitus); T2DM: Type 2 diabetes  
311 mellitus (Non-insulin-dependent diabetes mellitus); VKCFD2: Combined deficiency of vitamin K dependent clotting factors type 2; (X-)SCID: (X-  
312 linked) severe combined immunodeficiency

313 3) Others: ACTH: adrenocorticotrophic hormone ; CNS: Central nervous system; CRISPR-Cas: Clustered regularly interspaced short palindromic repeat;  
314 ERE: estrogen-responsive-element; ENU: N-ethyl-N-nitrosourea; eQTL: Expression quantitative trait locus; FHH: Fawn-hooded hypertensive; GLP1:  
315 Glucagon-like peptide 1; HDL: High density lipoproteins; HPA: Hypothalamus-pituitary-adrenal; HS: Heterogeneous stock; Ig: Immunoglobulins; IGF-

316 1: Insulin-like growth factor-1; KO: Knockout; LDL: Low density lipoprotein; LEW: Lewis; LH: Lyon hypertensive; LOH: Loss of heterozygosity;  
317 mTORC1: mTOR complex 1 (*MTOR*=mechanistic target of rapamycin kinase); MWF: Munich Wistar Frömter; NAA: N-acetyl-L-aspartate; QTL:  
318 Quantitative trait locus; QTN: Quantitative trait nucleotide; SD: Sprague-Dawley; SNP: Single nucleotide polymorphism; SHR: Spontaneously  
319 hypertensive rat; SHRSP: Spontaneously hypertensive rat, stroke prone; SHRSR: Spontaneously hypertensive rat, stroke resistant; SR: Dahl salt-  
320 resistant; SS: Dahl salt-sensitive; TNF: Tumor necrosis factor; UTR: Untranslated transcribed region; WT: Wild-type; WKY: Wistar-Kyoto; ZFN: Zinc  
321 finger nuclease.

322

---



## 323 **Acknowledgments**

324 The author thanks Jennifer Smith (RGD) for advice in extracting relevant data from RGD, in  
325 particular using the ontology browser for disease  
326 ([https://rgd.mcgill.ca/rgdweb/ontology/view.html?acc\\_id=DOID:4](https://rgd.mcgill.ca/rgdweb/ontology/view.html?acc_id=DOID:4)). The author is an Honorary  
327 Research Director of the FNRS (Belgium).

## 328 References

- 329 1. Jacob HJ. The rat: a model used in biomedical research. *Methods Mol Biol.* 2010;597:1-11.  
330 Epub 2009/12/17. doi: 10.1007/978-1-60327-389-3\_1. PubMed PMID: 20013222.
- 331 2. Aitman TJ, Critser JK, Cuppen E, Dominiczak A, Fernandez-Suarez XM, Flint J, et al. Progress  
332 and prospects in rat genetics: a community view. *Nat Genet.* 2008;40(5):516-22. Epub 2008/04/30.  
333 doi: 10.1038/ng.147. PubMed PMID: 18443588.
- 334 3. Aitman T, Dhillon P, Geurts AM. A RAtional choice for translational research? *Dis Model*  
335 *Mech.* 2016;9(10):1069-72. Epub 2016/10/14. doi: 10.1242/dmm.027706. PubMed PMID: 27736742;  
336 PubMed Central PMCID: PMC5087836.
- 337 4. James MR, Lindpaintner K. Why map the rat? *Trends Genet.* 1997;13(5):171-3. Epub  
338 1997/05/01. doi: 10.1016/s0168-9525(97)01130-x. PubMed PMID: 9153997.
- 339 5. Parker CC, Chen H, Fligel SB, Geurts AM, Richards JB, Robinson TE, et al. Rats are the smart  
340 choice: Rationale for a renewed focus on rats in behavioral genetics. *Neuropharmacology.* 2014;76  
341 Pt B:250-8. Epub 2013/06/25. doi: 10.1016/j.neuropharm.2013.05.047. PubMed PMID: 23791960;  
342 PubMed Central PMCID: PMC3823679.
- 343 6. Ellenbroek B, Youn J. Rodent models in neuroscience research: is it a rat race? *Dis Model*  
344 *Mech.* 2016;9(10):1079-87. Epub 2016/10/14. doi: 10.1242/dmm.026120. PubMed PMID: 27736744;  
345 PubMed Central PMCID: PMC5087838.
- 346 7. Carter CS, Richardson A, Huffman DM, Austad S. Bring Back the Rat! *J Gerontol A Biol Sci*  
347 *Med Sci.* 2020. Epub 2020/01/03. doi: 10.1093/gerona/glz298. PubMed PMID: 31894235.
- 348 8. Homberg JR, Wohr M, Alenina N. Comeback of the Rat in Biomedical Research. *ACS Chem*  
349 *Neurosci.* 2017;8(5):900-3. Epub 2017/02/10. doi: 10.1021/acschemneuro.6b00415. PubMed PMID:  
350 28182397.
- 351 9. Hashay SA, Wilding LA. Translational potential of rats in research. In: Suckow MA,  
352 Hankenson FC, Wilson RP, Foley PL, editors. *The Laboratory Rat.* Third Edition ed: Elsevier; 2020. p.  
353 77-88.
- 354 10. Szpirer C, Levan G. Rat gene mapping and genomics. In: Denny P, Kole C, editors. *Genome*  
355 *Mapping and Genomics in Laboratory Animals:* Springer; 2012. p. 217-56.
- 356 11. Wang SJ, Lauderkind SJF, Zhao Y, Hayman GT, Smith JR, Tutaj M, et al. Integrated curation  
357 and data mining for disease and phenotype models at the Rat Genome Database. *Database (Oxford).*  
358 2019;2019. Epub 2019/02/13. doi: 10.1093/database/baz014. PubMed PMID: 30753478; PubMed  
359 Central PMCID: PMC6369425.
- 360 12. Shimoyama M, Smith JR, Bryda E, Kuramoto T, Saba L, Dwinell M. Rat Genome and Model  
361 Resources. *ILAR J.* 2017;58(1):42-58. Epub 2017/08/26. doi: 10.1093/ilar/ilw041. PubMed PMID:  
362 28838068; PubMed Central PMCID: PMC6057551.
- 363 13. Mashimo T, Yanagihara K, Tokuda S, Voigt B, Takizawa A, Nakajima R, et al. An ENU-induced  
364 mutant archive for gene targeting in rats. *Nat Genet.* 2008;40(5):514-5. Epub 2008/04/30. doi:  
365 10.1038/ng0508-514. PubMed PMID: 18443587.
- 366 14. Meek S, Mashimo T, Burdon T. From engineering to editing the rat genome. *Mamm*  
367 *Genome.* 2017. Epub 2017/07/29. doi: 10.1007/s00335-017-9705-8  
368 10.1007/s00335-017-9705-8 [pii]. PubMed PMID: 28752194.
- 369 15. Kazuki Y, Kobayashi K, Hirabayashi M, Abe S, Kajitani N, Kazuki K, et al. Humanized UGT2 and  
370 CYP3A transchromosomal rats for improved prediction of human drug metabolism. *Proc Natl Acad*  
371 *Sci U S A.* 2019;116(8):3072-81. Epub 2019/02/06. doi: 10.1073/pnas.1808255116. PubMed PMID:  
372 30718425; PubMed Central PMCID: PMC6386724.
- 373 16. Aitman TJ, Petretto E, Behmoaras J. Genetic mapping and positional cloning. *Methods Mol*  
374 *Biol.* 2010;597:13-32. Epub 2009/12/17. doi: 10.1007/978-1-60327-389-3\_2. PubMed PMID:  
375 20013223.

- 376 17. Moreno-Moral A, Petretto E. From integrative genomics to systems genetics in the rat to link  
377 genotypes to phenotypes. *Dis Model Mech*. 2016;9(10):1097-110. Epub 2016/10/14. doi:  
378 10.1242/dmm.026104. PubMed PMID: 27736746; PubMed Central PMCID: PMC5087832.
- 379 18. Baud A, Flint J. Identifying genes for neurobehavioural traits in rodents: progress and pitfalls.  
380 *Dis Model Mech*. 2017;10(4):373-83. Epub 2017/04/07. doi: 10.1242/dmm.027789. PubMed PMID:  
381 28381599; PubMed Central PMCID: PMC5399566.
- 382 19. Rat Genome S, Mapping C, Baud A, Hermesen R, Guryev V, Stridh P, et al. Combined  
383 sequence-based and genetic mapping analysis of complex traits in outbred rats. *Nat Genet*.  
384 2013;45(7):767-75. Epub 2013/05/28. doi: 10.1038/ng.2644. PubMed PMID: 23708188; PubMed  
385 Central PMCID: PMC3821058.
- 386 20. Aitman TJ, Glazier AM, Wallace CA, Cooper LD, Norsworthy PJ, Wahid FN, et al. Identification  
387 of Cd36 (Fat) as an insulin-resistance gene causing defective fatty acid and glucose metabolism in  
388 hypertensive rats. *Nat Genet*. 1999;21(1):76-83. Epub 1999/01/23. doi: 10.1038/5013. PubMed  
389 PMID: 9916795.
- 390 21. Pravenec M, Churchill PC, Churchill MC, Viklicky O, Kazdova L, Aitman TJ, et al. Identification  
391 of renal Cd36 as a determinant of blood pressure and risk for hypertension. *Nat Genet*.  
392 2008;40(8):952-4. Epub 2008/07/01. doi: 10.1038/ng.164. PubMed PMID: 18587397.
- 393 22. Pravenec M, Landa V, Zidek V, Musilova A, Kren V, Kazdova L, et al. Transgenic rescue of  
394 defective Cd36 ameliorates insulin resistance in spontaneously hypertensive rats. *Nat Genet*.  
395 2001;27(2):156-8. Epub 2001/02/15. doi: 10.1038/84777. PubMed PMID: 11175782.
- 396 23. Corpeleijn E, van der Kallen CJ, Kruijshoop M, Magagnin MG, de Bruin TW, Feskens EJ, et al.  
397 Direct association of a promoter polymorphism in the CD36/FAT fatty acid transporter gene with  
398 Type 2 diabetes mellitus and insulin resistance. *Diabet Med*. 2006;23(8):907-11. Epub 2006/08/17.  
399 doi: 10.1111/j.1464-5491.2006.01888.x. PubMed PMID: 16911630.
- 400 24. Cheng X, Waghulde H, Mell B, Morgan EE, Pruett-Miller SM, Joe B. Positional cloning of  
401 quantitative trait nucleotides for blood pressure and cardiac QT-interval by targeted CRISPR/Cas9  
402 editing of a novel long non-coding RNA. *PLoS Genet*. 2017;13(8):e1006961. Epub 2017/08/23. doi:  
403 10.1371/journal.pgen.1006961. PubMed PMID: 28827789; PubMed Central PMCID:  
404 PMC5578691.
- 405 25. Newton-Cheh C, Eijgelsheim M, Rice KM, de Bakker PI, Yin X, Estrada K, et al. Common  
406 variants at ten loci influence QT interval duration in the QTGEN Study. *Nat Genet*. 2009;41(4):399-  
407 406. Epub 2009/03/24. doi: 10.1038/ng.364. PubMed PMID: 19305408; PubMed Central PMCID:  
408 PMC2701449.
- 409 26. Rubattu S, Stanzione R, Volpe M. Mitochondrial Dysfunction Contributes to Hypertensive  
410 Target Organ Damage: Lessons from an Animal Model of Human Disease. *Oxid Med Cell Longev*.  
411 2016;2016:1067801. Epub 2016/09/07. doi: 10.1155/2016/1067801. PubMed PMID: 27594970;  
412 PubMed Central PMCID: PMC4993945.
- 413 27. Rubattu S, Di Castro S, Schulz H, Geurts AM, Cotugno M, Bianchi F, et al. Ndufc2 Gene  
414 Inhibition Is Associated With Mitochondrial Dysfunction and Increased Stroke Susceptibility in an  
415 Animal Model of Complex Human Disease. *J Am Heart Assoc*. 2016;5(2). Epub 2016/02/19. doi:  
416 10.1161/JAHA.115.002701. PubMed PMID: 26888427; PubMed Central PMCID: PMC4802485.
- 417 28. Olofsson P, Holmberg J, Tordsson J, Lu S, Akerstrom B, Holmdahl R. Positional identification  
418 of Ncf1 as a gene that regulates arthritis severity in rats. *Nat Genet*. 2003;33(1):25-32. Epub  
419 2002/12/04. doi: 10.1038/ng1058. PubMed PMID: 12461526.
- 420 29. Holmdahl R, Sareila O, Olsson LM, Backdahl L, Wing K. Ncf1 polymorphism reveals oxidative  
421 regulation of autoimmune chronic inflammation. *Immunol Rev*. 2016;269(1):228-47. Epub  
422 2015/12/20. doi: 10.1111/imr.12378. PubMed PMID: 26683156.
- 423 30. Visscher PM, Wray NR, Zhang Q, Sklar P, McCarthy MI, Brown MA, et al. 10 Years of GWAS  
424 Discovery: Biology, Function, and Translation. *Am J Hum Genet*. 2017;101(1):5-22. Epub 2017/07/08.  
425 doi: 10.1016/j.ajhg.2017.06.005. PubMed PMID: 28686856; PubMed Central PMCID:  
426 PMC5501872.

- 427 31. Auer PL, Stitzel NO. Genetic association studies in cardiovascular diseases: Do we have  
428 enough power? *Trends Cardiovasc Med*. 2017;27(6):397-404. Epub 2017/05/01. doi:  
429 10.1016/j.tcm.2017.03.005. PubMed PMID: 28456354; PubMed Central PMCID: PMC5642948.
- 430 32. Flister MJ, Tsaih SW, O'Meara CC, Endres B, Hoffman MJ, Geurts AM, et al. Identifying  
431 multiple causative genes at a single GWAS locus. *Genome Res*. 2013;23(12):1996-2002. Epub  
432 2013/09/06. doi: 10.1101/gr.160283.113. PubMed PMID: 24006081; PubMed Central PMCID:  
433 PMC53847770.
- 434 33. Smith M. DNA Sequence Analysis in Clinical Medicine, Proceeding Cautiously. *Front Mol*  
435 *Biosci*. 2017;4:24. Epub 2017/05/19. doi: 10.3389/fmolb.2017.00024. PubMed PMID: 28516087;  
436 PubMed Central PMCID: PMC5413496.
- 437 34. Peng W, Li M, Li H, Tang K, Zhuang J, Zhang J, et al. Dysfunction of Myosin Light-Chain 4  
438 (MYL4) Leads to Heritable Atrial Cardiomyopathy With Electrical, Contractile, and Structural  
439 Components: Evidence From Genetically-Engineered Rats. *J Am Heart Assoc*. 2017;6(11). Epub  
440 2017/10/31. doi: 10.1161/JAHA.117.007030. PubMed PMID: 29080865; PubMed Central PMCID:  
441 PMC5721782.
- 442 35. Harony-Nicolas H, Kay M, du Hoffmann J, Klein ME, Bozdagi-Gunal O, Riad M, et al. Oxytocin  
443 improves behavioral and electrophysiological deficits in a novel Shank3-deficient rat. *Elife*. 2017;6.  
444 Epub 2017/02/01. doi: 10.7554/eLife.18904. PubMed PMID: 28139198; PubMed Central PMCID:  
445 PMC5283828.
- 446 36. St Laurent R, Helm SR, Glenn MJ. Reduced cocaine-seeking behavior in heterozygous BDNF  
447 knockout rats. *Neurosci Lett*. 2013;544:94-9. Epub 2013/04/16. doi: 10.1016/j.neulet.2013.03.050.  
448 PubMed PMID: 23583595; PubMed Central PMCID: PMC3773519.
- 449 37. King CP, Militello L, Hart A, St Pierre CL, Leung E, Versaggi CL, et al. Cdh13 and AdipoQ gene  
450 knockout alter instrumental and Pavlovian drug conditioning. *Genes Brain Behav*. 2017;16(7):686-98.  
451 Epub 2017/04/08. doi: 10.1111/gbb.12382. PubMed PMID: 28387990; PubMed Central PMCID:  
452 PMC5595635.
- 453 38. Gao JT, Jordan CJ, Bi GH, He Y, Yang HJ, Gardner EL, et al. Deletion of the type 2  
454 metabotropic glutamate receptor increases heroin abuse vulnerability in transgenic rats.  
455 *Neuropsychopharmacology*. 2018;43(13):2615-26. Epub 2018/10/05. doi: 10.1038/s41386-018-  
456 0231-5  
457 10.1038/s41386-018-0231-5 [pii]. PubMed PMID: 30283001.
- 458 39. Yang HJ, Zhang HY, Bi GH, He Y, Gao JT, Xi ZX. Deletion of Type 2 Metabotropic Glutamate  
459 Receptor Decreases Sensitivity to Cocaine Reward in Rats. *Cell Rep*. 2017;20(2):319-32. Epub  
460 2017/07/13. doi: 10.1016/j.celrep.2017.06.046. PubMed PMID: 28700935; PubMed Central PMCID:  
461 PMC5555082.
- 462 40. Yamamoto T, Izumi-Yamamoto K, Iizuka Y, Shirota M, Nagase M, Fujita T, et al. A novel link  
463 between Slc22a18 and fat accumulation revealed by a mutation in the spontaneously hypertensive  
464 rat. *Biochem Biophys Res Commun*. 2013;440(4):521-6. Epub 2013/10/09. doi:  
465 10.1016/j.bbrc.2013.09.096. PubMed PMID: 24099777.
- 466 41. Dang R, Sasaki N, Nishino T, Nakanishi M, Torigoe D, Agui T. Lymphopenia in Ednr $\beta$ -deficient  
467 rat was strongly modified by genetic background. *Biomed Res*. 2012;33(4):249-53. Epub 2012/09/15.  
468 doi: 10.2220/biomedres.33.249. PubMed PMID: 22975636.
- 469 42. Garipey CE, Cass DT, Yanagisawa M. Null mutation of endothelin receptor type B gene in  
470 spotting lethal rats causes aganglionic megacolon and white coat color. *Proc Natl Acad Sci U S A*.  
471 1996;93(2):867-72. Epub 1996/01/23. doi: 10.1073/pnas.93.2.867. PubMed PMID: 8570650;  
472 PubMed Central PMCID: PMC40149.
- 473 43. Kunieda T, Kumagai T, Tsuji T, Ozaki T, Karaki H, Ikadai H. A mutation in endothelin-B  
474 receptor gene causes myenteric aganglionosis and coat color spotting in rats. *DNA Res*.  
475 1996;3(2):101-5. Epub 1996/04/30. doi: 10.1093/dnares/3.2.101. PubMed PMID: 8804863.
- 476 44. Dang R, Torigoe D, Sasaki N, Agui T. QTL analysis identifies a modifier locus of aganglionosis  
477 in the rat model of Hirschsprung disease carrying Ednr $\beta$ (sl) mutations. *PLoS One*. 2011;6(11):e27902.

- 478 Epub 2011/12/02. doi: 10.1371/journal.pone.0027902. PubMed PMID: 22132166; PubMed Central  
479 PMCID: PMCPMC3222640.
- 480 45. Huang J, Dang R, Torigoe D, Li A, Lei C, Sasaki N, et al. Genetic variation in the GDNF  
481 promoter affects its expression and modifies the severity of Hirschsprung's disease (HSCR) in rats  
482 carrying Ednrb(sl) mutations. *Gene*. 2016;575(1):144-8. Epub 2015/09/01. doi:  
483 10.1016/j.gene.2015.08.051. PubMed PMID: 26318480.
- 484 46. Wang J, Dang R, Miyasaka Y, Hattori K, Torigoe D, Okamura T, et al. Null mutation of the  
485 endothelin receptor type B gene causes embryonic death in the GK rat. *PLoS One*.  
486 2019;14(6):e0217132. Epub 2019/06/07. doi: 10.1371/journal.pone.0217132. PubMed PMID:  
487 31170185; PubMed Central PMCID: PMCPMC6553694.
- 488 47. Ceccherini I, Zhang AL, Matera I, Yang G, Devoto M, Romeo G, et al. Interstitial deletion of  
489 the endothelin-B receptor gene in the spotting lethal (sl) rat. *Hum Mol Genet*. 1995;4(11):2089-96.  
490 Epub 1995/11/01. doi: 10.1093/hmg/4.11.2089. PubMed PMID: 8589685.
- 491 48. Pridans C, Raper A, Davis GM, Alves J, Sauter KA, Lefevre L, et al. Pleiotropic Impacts of  
492 Macrophage and Microglial Deficiency on Development in Rats with Targeted Mutation of the Csf1r  
493 Locus. *J Immunol*. 2018;201(9):2683-99. Epub 2018/09/27. doi: 10.4049/jimmunol.1701783.  
494 PubMed PMID: 30249809; PubMed Central PMCID: PMCPMC6196293.
- 495 49. Muto T, Miyoshi K, Horiguchi T, Hagita H, Noma T. Novel genetic linkage of rat Sp6 mutation  
496 to Amelogenesis imperfecta. *Orphanet J Rare Dis*. 2012;7:34. Epub 2012/06/09. doi: 10.1186/1750-  
497 1172-7-34. PubMed PMID: 22676574; PubMed Central PMCID: PMCPMC3464675.
- 498 50. Esumi H, Takahashi Y, Sato S, Nagase S, Sugimura T. A seven-base-pair deletion in an intron  
499 of the albumin gene of analbuminemic rats. *Proc Natl Acad Sci U S A*. 1983;80(1):95-9. Epub  
500 1983/01/01. doi: 10.1073/pnas.80.1.95. PubMed PMID: 6572011; PubMed Central PMCID:  
501 PMCPMC393316.
- 502 51. Tsujimura T, Hirota S, Nomura S, Niwa Y, Yamazaki M, Tono T, et al. Characterization of Ws  
503 mutant allele of rats: a 12-base deletion in tyrosine kinase domain of c-kit gene. *Blood*.  
504 1991;78(8):1942-6. Epub 1991/10/15. PubMed PMID: 1912577.
- 505 52. Fleming MD, Romano MA, Su MA, Garrick LM, Garrick MD, Andrews NC. Nramp2 is mutated  
506 in the anemic Belgrade (b) rat: evidence of a role for Nramp2 in endosomal iron transport. *Proc Natl*  
507 *Acad Sci U S A*. 1998;95(3):1148-53. Epub 1998/03/14. doi: 10.1073/pnas.95.3.1148. PubMed PMID:  
508 9448300; PubMed Central PMCID: PMCPMC18702.
- 509 53. Berg EL, Pride MC, Petkova SP, Lee RD, Copping NA, Shen Y, et al. Translational outcomes in  
510 a full gene deletion of ubiquitin protein ligase E3A rat model of Angelman syndrome. *Translational*  
511 *Psychiatry*. 2020;10(1):39. doi: 10.1038/s41398-020-0720-2.
- 512 54. Tokuda S, Kuramoto T, Tanaka K, Kaneko S, Takeuchi IK, Sasa M, et al. The ataxic groggy rat  
513 has a missense mutation in the P/Q-type voltage-gated Ca<sup>2+</sup> channel alpha1A subunit gene and  
514 exhibits absence seizures. *Brain Res*. 2007;1133(1):168-77. Epub 2007/01/02. doi:  
515 10.1016/j.brainres.2006.10.086. PubMed PMID: 17196942.
- 516 55. Quek H, Luff J, Cheung K, Kozlov S, Gatei M, Lee CS, et al. A rat model of ataxia-  
517 telangiectasia: evidence for a neurodegenerative phenotype. *Hum Mol Genet*. 2017;26(1):109-23.  
518 Epub 2016/12/23. doi: 10.1093/hmg/ddw371. PubMed PMID: 28007901.
- 519 56. Quek H, Luff J, Cheung K, Kozlov S, Gatei M, Lee CS, et al. Rats with a missense mutation in  
520 Atm display neuroinflammation and neurodegeneration subsequent to accumulation of cytosolic  
521 DNA following unrepaired DNA damage. *J Leukoc Biol*. 2017;101(4):927-47. Epub 2016/11/30. doi:  
522 10.1189/jlb.4VMA0716-316R. PubMed PMID: 27895165.
- 523 57. Scott KE, Schormans AL, Pacoli KY, De Oliveira C, Allman BL, Schmid S. Altered Auditory  
524 Processing, Filtering, and Reactivity in the Cntnap2 Knock-Out Rat Model for Neurodevelopmental  
525 Disorders. *J Neurosci*. 2018;38(40):8588-604. Epub 2018/08/22. doi: 10.1523/JNEUROSCI.0759-  
526 18.2018. PubMed PMID: 30126973; PubMed Central PMCID: PMCPMC6596223.
- 527 58. Hamilton SM, Green JR, Veeraragavan S, Yuva L, McCoy A, Wu Y, et al. Fmr1 and Nlgn3  
528 knockout rats: novel tools for investigating autism spectrum disorders. *Behav Neurosci*.  
529 2014;128(2):103-9. Epub 2014/04/30. doi: 10.1037/a0035988. PubMed PMID: 24773431.

- 530 59. Thomas AM, Schwartz MD, Saxe MD, Kilduff TS. Sleep/Wake Physiology and Quantitative  
531 Electroencephalogram Analysis of the Neuroligin-3 Knockout Rat Model of Autism Spectrum  
532 Disorder. *Sleep*. 2017;40(10). Epub 2017/09/29. doi: 10.1093/sleep/zsx138. PubMed PMID:  
533 28958035.
- 534 60. Modi ME, Brooks JM, Guilmette ER, Beyna M, Graf R, Reim D, et al. Hyperactivity and  
535 Hypermotivation Associated With Increased Striatal mGluR1 Signaling in a Shank2 Rat Model of  
536 Autism. *Front Mol Neurosci*. 2018;11:107. Epub 2018/07/05. doi: 10.3389/fnmol.2018.00107.  
537 PubMed PMID: 29970986; PubMed Central PMCID: PMC6018399.
- 538 61. Kuwamura M, Muraguchi T, Matsui T, Ueno M, Takenaka S, Yamate J, et al. Mutation at the  
539 Lmx1a locus provokes aberrant brain development in the rat. *Brain Res Dev Brain Res*.  
540 2005;155(2):99-106. Epub 2005/04/05. doi: 10.1016/j.devbrainres.2004.12.009. PubMed PMID:  
541 15804398.
- 542 62. Cotroneo MS, Haag JD, Zan Y, Lopez CC, Thuwajit P, Petukhova GV, et al. Characterizing a rat  
543 Brca2 knockout model. *Oncogene*. 2007;26(11):1626-35. Epub 2006/09/12. doi:  
544 10.1038/sj.onc.1209960. PubMed PMID: 16964288.
- 545 63. van Boxtel R, Toonen PW, van Roekel HS, Verheul M, Smits BM, Korving J, et al. Lack of DNA  
546 mismatch repair protein MSH6 in the rat results in hereditary non-polyposis colorectal cancer-like  
547 tumorigenesis. *Carcinogenesis*. 2008;29(6):1290-7. Epub 2008/04/18. doi: 10.1093/carcin/bgn094.  
548 PubMed PMID: 18417481.
- 549 64. Yan HX, Wu HP, Ashton C, Tong C, Ying QL. Rats deficient for p53 are susceptible to  
550 spontaneous and carcinogen-induced tumorigenesis. *Carcinogenesis*. 2012;33(10):2001-5. Epub  
551 2012/07/14. doi: 10.1093/carcin/bgs238. PubMed PMID: 22791818; PubMed Central PMCID:  
552 PMC3499043.
- 553 65. van Boxtel R, Kuiper RV, Toonen PW, van Heesch S, Hermsen R, de Bruin A, et al.  
554 Homozygous and heterozygous p53 knockout rats develop metastasizing sarcomas with high  
555 frequency. *Am J Pathol*. 2011;179(4):1616-22. Epub 2011/08/23. doi: 10.1016/j.ajpath.2011.06.036.  
556 PubMed PMID: 21854749; PubMed Central PMCID: PMC3181367.
- 557 66. Hansen SA, Hart ML, Busi S, Parker T, Goerndt A, Jones K, et al. Fischer-344 Tp53-knockout  
558 rats exhibit a high rate of bone and brain neoplasia with frequent metastasis. *Dis Model Mech*.  
559 2016;9(10):1139-46. Epub 2016/08/17. doi: 10.1242/dmm.025767. PubMed PMID: 27528400;  
560 PubMed Central PMCID: PMC5087826.
- 561 67. Yoshimi K, Tanaka T, Takizawa A, Kato M, Hirabayashi M, Mashimo T, et al. Enhanced colitis-  
562 associated colon carcinogenesis in a novel Apc mutant rat. *Cancer Sci*. 2009;100(11):2022-7. Epub  
563 2009/08/22. doi: 10.1111/j.1349-7006.2009.01287.x. PubMed PMID: 19694754.
- 564 68. Amos-Landgraf JM, Kwong LN, Kendzierski CM, Reichelderfer M, Torrealba J, Weichert J, et  
565 al. A target-selected Apc-mutant rat kindred enhances the modeling of familial human colon cancer.  
566 *Proc Natl Acad Sci U S A*. 2007;104(10):4036-41. Epub 2007/03/16. doi: 10.1073/pnas.0611690104.  
567 PubMed PMID: 17360473; PubMed Central PMCID: PMC1805486.
- 568 69. Irving AA, Yoshimi K, Hart ML, Parker T, Clipson L, Ford MR, et al. The utility of Apc-mutant  
569 rats in modeling human colon cancer. *Dis Model Mech*. 2014;7(11):1215-25. Epub 2014/10/08. doi:  
570 10.1242/dmm.016980. PubMed PMID: 25288683; PubMed Central PMCID: PMC4213726.
- 571 70. Ding L, Shunkwiler LB, Harper NW, Zhao Y, Hinohara K, Huh SJ, et al. Deletion of Cdkn1b in  
572 ACI rats leads to increased proliferation and pregnancy-associated changes in the mammary gland  
573 due to perturbed systemic endocrine environment. *PLoS Genet*. 2019;15(3):e1008002. Epub  
574 2019/03/21. doi: 10.1371/journal.pgen.1008002. PubMed PMID: 30893315; PubMed Central  
575 PMCID: PMC6443185.
- 576 71. Pellegata NS, Quintanilla-Martinez L, Siggelkow H, Samson E, Bink K, Hofler H, et al. Germ-  
577 line mutations in p27Kip1 cause a multiple endocrine neoplasia syndrome in rats and humans. *Proc*  
578 *Natl Acad Sci U S A*. 2006;103(42):15558-63. Epub 2006/10/13. doi: 10.1073/pnas.0603877103.  
579 PubMed PMID: 17030811; PubMed Central PMCID: PMC1622862.
- 580 72. Okimoto K, Sakurai J, Kobayashi T, Mitani H, Hirayama Y, Nickerson ML, et al. A germ-line  
581 insertion in the Birt-Hogg-Dube (BHD) gene gives rise to the Nihon rat model of inherited renal

- 582 cancer. *Proc Natl Acad Sci U S A*. 2004;101(7):2023-7. Epub 2004/02/11. doi:  
583 10.1073/pnas.0308071100. PubMed PMID: 14769940; PubMed Central PMCID: PMCPMC357045.
- 584 73. Yeung RS, Xiao GH, Jin F, Lee WC, Testa JR, Knudson AG. Predisposition to renal carcinoma in  
585 the Eker rat is determined by germ-line mutation of the tuberous sclerosis 2 (TSC2) gene. *Proc Natl*  
586 *Acad Sci U S A*. 1994;91(24):11413-6. Epub 1994/11/22. doi: 10.1073/pnas.91.24.11413. PubMed  
587 PMID: 7972075; PubMed Central PMCID: PMCPMC45241.
- 588 74. Flister MJ, Hoffman MJ, Lemke A, Prisco SZ, Rudemiller N, O'Meara CC, et al. SH2B3 Is a  
589 Genetic Determinant of Cardiac Inflammation and Fibrosis. *Circ Cardiovasc Genet*. 2015;8(2):294-  
590 304. Epub 2015/01/30. doi: 10.1161/CIRCGENETICS.114.000527. PubMed PMID: 25628389.
- 591 75. Luo C, Xie X, Feng X, Lei B, Fang C, Li Y, et al. Deficiency of Interleukin-36 Receptor Protected  
592 Cardiomyocytes from Ischemia-Reperfusion Injury in Cardiopulmonary Bypass. *Med Sci Monit*.  
593 2020;26:e918933. Epub 2020/02/13. doi: 10.12659/MSM.918933. PubMed PMID: 32048631.
- 594 76. Zhou Q, Peng X, Liu X, Chen L, Xiong Q, Shen Y, et al. FAT10 attenuates hypoxia-induced  
595 cardiomyocyte apoptosis by stabilizing caveolin-3. *J Mol Cell Cardiol*. 2018;116:115-24. Epub  
596 2018/02/14. doi: 10.1016/j.yjmcc.2018.02.008. PubMed PMID: 29438664.
- 597 77. Wu TT, Ma YW, Zhang X, Dong W, Gao S, Wang JZ, et al. Myocardial tissue-specific Dnmt1  
598 knockout in rats protects against pathological injury induced by Adriamycin. *Lab Invest*. 2020. Epub  
599 2020/02/14. doi: 10.1038/s41374-020-0402-y. PubMed PMID: 32051532.
- 600 78. Guo W, Pleitner JM, Saupe KW, Greaser ML. Pathophysiological defects and transcriptional  
601 profiling in the RBM20-/- rat model. *PLoS One*. 2013;8(12):e84281. Epub 2013/12/25. doi:  
602 10.1371/journal.pone.0084281. PubMed PMID: 24367651; PubMed Central PMCID:  
603 PMCPMC3868568.
- 604 79. Zigler JS, Jr., Zhang C, Grebe R, Sehrawat G, Hackler L, Jr., Adhya S, et al. Mutation in the  
605 betaA3/A1-crystallin gene impairs phagosome degradation in the retinal pigmented epithelium of  
606 the rat. *J Cell Sci*. 2011;124(Pt 4):523-31. Epub 2011/01/27. doi: 10.1242/jcs.078790. PubMed PMID:  
607 21266465; PubMed Central PMCID: PMCPMC3031366.
- 608 80. Sinha D, Klise A, Sergeev Y, Hose S, Bhutto IA, Hackler L, Jr., et al. betaA3/A1-crystallin in  
609 astroglial cells regulates retinal vascular remodeling during development. *Mol Cell Neurosci*.  
610 2008;37(1):85-95. Epub 2007/10/13. doi: 10.1016/j.mcn.2007.08.016. PubMed PMID: 17931883;  
611 PubMed Central PMCID: PMCPMC4943342.
- 612 81. Johnson AC, Lee JW, Harmon AC, Morris Z, Wang X, Fratkin J, et al. A mutation in the start  
613 codon of gamma-crystallin D leads to nuclear cataracts in the Dahl SS/Jr-Ctr strain. *Mamm Genome*.  
614 2013;24(3-4):95-104. Epub 2013/02/14. doi: 10.1007/s00335-013-9447-1. PubMed PMID:  
615 23404175; PubMed Central PMCID: PMCPMC3628938.
- 616 82. Yoshida M, Harada Y, Kaidzu S, Ohira A, Masuda J, Nabika T. New genetic model rat for  
617 congenital cataracts due to a connexin 46 (Gja3 ) mutation. *Pathol Int*. 2005;55(11):732-7. Epub  
618 2005/11/08. doi: 10.1111/j.1440-1827.2005.01896.x. PubMed PMID: 16271086.
- 619 83. Liska F, Chylikova B, Martinek J, Kren V. Microphthalmia and cataract in rats with a novel  
620 point mutation in connexin 50 - L7Q. *Mol Vis*. 2008;14:823-8. Epub 2008/05/13. PubMed PMID:  
621 18470322.
- 622 84. Yamashita S, Furumoto K, Nobukiyo A, Kamohara M, Ushijima T, Furukawa T. Mapping of A  
623 gene responsible for cataract formation and its modifier in the UPL rat. *Invest Ophthalmol Vis Sci*.  
624 2002;43(10):3153-9. Epub 2002/10/03. PubMed PMID: 12356818.
- 625 85. Mori M, Li G, Abe I, Nakayama J, Guo Z, Sawashita J, et al. Lanosterol synthase mutations  
626 cause cholesterol deficiency-associated cataracts in the Shumiya cataract rat. *J Clin Invest*.  
627 2006;116(2):395-404. Epub 2006/01/28. doi: 10.1172/JCI20797. PubMed PMID: 16440058; PubMed  
628 Central PMCID: PMCPMC1350995.
- 629 86. Zhao L, Chen XJ, Zhu J, Xi YB, Yang X, Hu LD, et al. Lanosterol reverses protein aggregation in  
630 cataracts. *Nature*. 2015;523(7562):607-11. Epub 2015/07/23. doi: 10.1038/nature14650. PubMed  
631 PMID: 26200341.
- 632 87. Watanabe K, Wada K, Ohashi T, Okubo S, Takekuma K, Hashizume R, et al. A 5-bp insertion in  
633 Mip causes recessive congenital cataract in KFRS4/Kyo rats. *PLoS One*. 2012;7(11):e50737. Epub

- 634 2012/12/12. doi: 10.1371/journal.pone.0050737. PubMed PMID: 23226368; PubMed Central  
635 PMCID: PMCPMC3511373.
- 636 88. Mori M, Nishikawa T, Higuchi K, Nishimura M. Deletion in the beige gene of the beige rat  
637 owing to recombination between LINE1s. *Mamm Genome*. 1999;10(7):692-5. Epub 1999/06/29. doi:  
638 10.1007/s003359901072. PubMed PMID: 10384041.
- 639 89. Kuramoto T, Kuwamura M, Serikawa T. Rat neurological mutations cerebellar vermis defect  
640 and hobble are caused by mutations in the netrin-1 receptor gene *Unc5h3*. *Brain Res Mol Brain Res*.  
641 2004;122(2):103-8. Epub 2004/03/11. doi: 10.1016/j.molbrainres.2003.12.003. PubMed PMID:  
642 15010202.
- 643 90. Mashimo T, Kaneko T, Sakuma T, Kobayashi J, Kunihiro Y, Voigt B, et al. Efficient gene  
644 targeting by TAL effector nucleases coinjected with exonucleases in zygotes. *Sci Rep*. 2013;3:1253.  
645 Epub 2013/02/15. doi: 10.1038/srep01253. PubMed PMID: 23409244; PubMed Central PMCID:  
646 PMCPMC3570776.
- 647 91. Blaszczyk WM, Arning L, Hoffmann KP, Epplen JT. A Tyrosinase missense mutation causes  
648 albinism in the Wistar rat. *Pigment Cell Res*. 2005;18(2):144-5. Epub 2005/03/12. doi:  
649 10.1111/j.1600-0749.2005.00227.x. PubMed PMID: 15760344.
- 650 92. Kuramoto T, Yokoe M, Yagasaki K, Kawaguchi T, Kumafuji K, Serikawa T. Genetic analyses of  
651 fancy rat-derived mutations. *Exp Anim*. 2010;59(2):147-55. Epub 2010/05/21. doi:  
652 10.1538/expanim.59.147. PubMed PMID: 20484848.
- 653 93. Yoshimi K, Kaneko T, Voigt B, Mashimo T. Allele-specific genome editing and correction of  
654 disease-associated phenotypes in rats using the CRISPR-Cas platform. *Nat Commun*. 2014;5:4240.  
655 Epub 2014/06/27. doi: 10.1038/ncomms5240. PubMed PMID: 24967838; PubMed Central PMCID:  
656 PMCPMC4083438.
- 657 94. Kuramoto T, Nomoto T, Sugimura T, Ushijima T. Cloning of the rat agouti gene and  
658 identification of the rat nonagouti mutation. *Mamm Genome*. 2001;12(6):469-71. Epub 2001/05/16.  
659 doi: 10.1007/s003350020010. PubMed PMID: 11353396.
- 660 95. Kuramoto T, Nakanishi S, Ochiai M, Nakagama H, Voigt B, Serikawa T. Origins of albino and  
661 hooded rats: implications from molecular genetic analysis across modern laboratory rat strains. *PLoS*  
662 *One*. 2012;7(8):e43059. Epub 2012/08/24. doi: 10.1371/journal.pone.0043059. PubMed PMID:  
663 22916206; PubMed Central PMCID: PMCPMC3420875.
- 664 96. Xu Y, Wu Z, Liu L, Liu J, Wang Y. Rat Model of Cockayne Syndrome Neurological Disease. *Cell*  
665 *Rep*. 2019;29(4):800-9 e5. Epub 2019/10/24. doi: 10.1016/j.celrep.2019.09.028. PubMed PMID:  
666 31644904.
- 667 97. Gu Y, Wang L, Zhou J, Guo Q, Liu N, Ding Z, et al. A naturally-occurring mutation in *Cacna1f* in  
668 a rat model of congenital stationary night blindness. *Mol Vis*. 2008;14:20-8. Epub 2008/02/05. doi:  
669 v13/a3 [pii]. PubMed PMID: 18246026; PubMed Central PMCID: PMCPMC2267729.
- 670 98. Yokoi N, Namae M, Wang HY, Kojima K, Fuse M, Yasuda K, et al. Rat neurological disease  
671 creeping is caused by a mutation in the *reelin* gene. *Brain Res Mol Brain Res*. 2003;112(1-2):1-7.  
672 Epub 2003/04/03. doi: 10.1016/s0169-328x(02)00650-2. PubMed PMID: 12670697.
- 673 99. Tuggle KL, Birket SE, Cui X, Hong J, Warren J, Reid L, et al. Characterization of defects in ion  
674 transport and tissue development in cystic fibrosis transmembrane conductance regulator (CFTR)-  
675 knockout rats. *PLoS One*. 2014;9(3):e91253. Epub 2014/03/13. doi: 10.1371/journal.pone.0091253.  
676 PubMed PMID: 24608905; PubMed Central PMCID: PMCPMC3946746.
- 677 100. Dreano E, Bacchetta M, Simonin J, Galmiche L, Usal C, Slimani L, et al. Characterization of  
678 two rat models of cystic fibrosis-KO and F508del CFTR-Generated by Crispr-Cas9. *Animal Model Exp*  
679 *Med*. 2019;2(4):297-311. Epub 2020/01/17. doi: 10.1002/ame2.12091. PubMed PMID: 31942562;  
680 PubMed Central PMCID: PMCPMC6930998.
- 681 101. Sinkevicius KW, Morrison TR, Kulkarni P, Caffrey Cagliostro MK, Iriah S, Malmberg S, et al.  
682 *RNaseT2* knockout rats exhibit hippocampal neuropathology and deficits in memory. *Dis Model*  
683 *Mech*. 2018;11(6). Epub 2018/05/13. doi: 10.1242/dmm.032631. PubMed PMID: 29752287;  
684 PubMed Central PMCID: PMCPMC6031352.



- 685 102. Shimizu Y, Yanobu-Takanashi R, Nakano K, Hamase K, Shimizu T, Okamura T. A deletion in  
686 the *Ctns* gene causes renal tubular dysfunction and cystine accumulation in LEA/Tohm rats. *Mamm*  
687 *Genome*. 2019;30(1-2):23-33. Epub 2018/12/29. doi: 10.1007/s00335-018-9790-3. PubMed PMID:  
688 30591971; PubMed Central PMCID: PMC6397714.
- 689 103. Ma S, Zhang M, Zhang S, Wang J, Zhou X, Guo G, et al. Characterisation of Lamp2-deficient  
690 rats for potential new animal model of Danon disease. *Sci Rep*. 2018;8(1):6932. Epub 2018/05/04.  
691 doi: 10.1038/s41598-018-24351-w. PubMed PMID: 29720683; PubMed Central PMCID:  
692 PMC65932014.
- 693 104. Gohma H, Kuramoto T, Kuwamura M, Okajima R, Tanimoto N, Yamasaki K, et al. WTC  
694 deafness Kyoto (dfk): a rat model for extensive investigations of *Kcnq1* functions. *Physiol Genomics*.  
695 2006;24(3):198-206. Epub 2005/12/22. doi: 10.1152/physiolgenomics.00221.2005. PubMed PMID:  
696 16368876.
- 697 105. Smits BM, Peters TA, Mul JD, Croes HJ, Fransen JA, Beynon AJ, et al. Identification of a rat  
698 model for usher syndrome type 1B by N-ethyl-N-nitrosourea mutagenesis-driven forward genetics.  
699 *Genetics*. 2005;170(4):1887-96. Epub 2005/06/21. doi: 10.1534/genetics.105.044222. PubMed  
700 PMID: 15965244; PubMed Central PMCID: PMC6397714.
- 701 106. Naoi K, Kuramoto T, Kuwamura Y, Gohma H, Kuwamura M, Serikawa T. Characterization of  
702 the Kyoto circling (KCI) rat carrying a spontaneous nonsense mutation in the protocadherin 15  
703 (*Pcdh15*) gene. *Exp Anim*. 2009;58(1):1-10. Epub 2009/01/20. doi: 10.1538/expanim.58.1. PubMed  
704 PMID: 19151506.
- 705 107. Held N, Smits BM, Gockeln R, Schubert S, Nave H, Northrup E, et al. A mutation in *Myo15*  
706 leads to Usher-like symptoms in LEW/Ztm-ci2 rats. *PLoS One*. 2011;6(3):e15669. Epub 2011/04/12.  
707 doi: 10.1371/journal.pone.0015669. PubMed PMID: 21479269; PubMed Central PMCID:  
708 PMC6397714.
- 709 108. Nishitani A, Tanaka M, Shimizu S, Kunisawa N, Yokoe M, Yoshida Y, et al. Involvement of  
710 aspartoacylase in tremor expression in rats. *Exp Anim*. 2016;65(3):293-301. Epub 2016/03/31. doi:  
711 10.1538/expanim.16-0007. PubMed PMID: 27026062; PubMed Central PMCID: PMC6397714.
- 712 109. O'Connor LT, Goetz BD, Kwiczen JM, Delaney KH, Fletch AL, Duncan ID. Insertion of a  
713 retrotransposon in *Mbp* disrupts mRNA splicing and myelination in a new mutant rat. *J Neurosci*.  
714 1999;19(9):3404-13. Epub 1999/04/23. PubMed PMID: 10212300; PubMed Central PMCID:  
715 PMC6397714.
- 716 110. Kuramoto T, Kuwamura M, Tokuda S, Izawa T, Nakane Y, Kitada K, et al. A mutation in the  
717 gene encoding mitochondrial Mg<sup>2+</sup> channel *MRS2* results in demyelination in the rat. *PLoS Genet*.  
718 2011;7(1):e1001262. Epub 2011/01/22. doi: 10.1371/journal.pgen.1001262. PubMed PMID:  
719 21253565; PubMed Central PMCID: PMC6397714.
- 720 111. Boison D, Stoffel W. Myelin-deficient rat: a point mutation in exon III (A----C, Thr75----Pro) of  
721 the myelin proteolipid protein causes dysmyelination and oligodendrocyte death. *EMBO J*.  
722 1989;8(11):3295-302. Epub 1989/11/01. PubMed PMID: 2479544; PubMed Central PMCID:  
723 PMC6397714.
- 724 112. Duncan ID, Bugiani M, Radcliff AB, Moran JJ, Lopez-Anido C, Duong P, et al. A mutation in the  
725 *Tubb4a* gene leads to microtubule accumulation with hypomyelination and demyelination. *Ann*  
726 *Neurol*. 2017;81(5):690-702. Epub 2017/04/11. doi: 10.1002/ana.24930. PubMed PMID: 28393430;  
727 PubMed Central PMCID: PMC6397714.
- 728 113. Geddes BJ, Harding TC, Lightman SL, Uney JB. Long-term gene therapy in the CNS: reversal of  
729 hypothalamic diabetes insipidus in the Brattleboro rat by using an adenovirus expressing arginine  
730 vasopressin. *Nat Med*. 1997;3(12):1402-4. Epub 1997/12/13. doi: 10.1038/nm1297-1402. PubMed  
731 PMID: 9396613.
- 732 114. Schmale H, Richter D. Single base deletion in the vasopressin gene is the cause of diabetes  
733 insipidus in Brattleboro rats. *Nature*. 1984;308:705-9.
- 734 115. Takagishi Y, Murata Y. Myosin Va mutation in rats is an animal model for the human  
735 hereditary neurological disease, Griscelli syndrome type 1. *Ann N Y Acad Sci*. 2006;1086:66-80. Epub  
736 2006/12/23. doi: 10.1196/annals.1377.006. PubMed PMID: 17185506.

- 737 116. Landrock KK, Sullivan P, Martini-Stoica H, Goldstein DS, Graham BH, Yamamoto S, et al.  
738 Pleiotropic neuropathological and biochemical alterations associated with Myo5a mutation in a rat  
739 Model. *Brain Res.* 2018;1679:155-70. Epub 2017/12/09. doi: S0006-8993(17)30534-6 [pii]  
10.1016/j.brainres.2017.11.029. PubMed PMID: 29217155.
- 740 117. Larcher T, Lafoux A, Tesson L, Remy S, Thepenier V, Francois V, et al. Characterization of  
741 dystrophin deficient rats: a new model for Duchenne muscular dystrophy. *PLoS One.*  
742 2014;9(10):e110371. Epub 2014/10/14. doi: 10.1371/journal.pone.0110371  
743 PONE-D-14-34606 [pii]. PubMed PMID: 25310701.
- 744 118. Nakamura K, Fujii W, Tsuboi M, Tanihata J, Teramoto N, Takeuchi S, et al. Generation of  
745 muscular dystrophy model rats with a CRISPR/Cas system. *Sci Rep.* 2014;4:5635. Epub 2014/07/10.  
746 doi: 10.1038/srep05635. PubMed PMID: 25005781; PubMed Central PMCID: PMC4088098.
- 747 119. Clifford PS, Rodriguez J, Schul D, Hughes S, Kniffin T, Hart N, et al. Attenuation of cocaine-  
748 induced locomotor sensitization in rats sustaining genetic or pharmacologic antagonism of ghrelin  
749 receptors. *Addict Biol.* 2012;17(6):956-63. Epub 2011/07/28. doi: 10.1111/j.1369-  
750 1600.2011.00339.x. PubMed PMID: 21790898; PubMed Central PMCID: PMC3204336.
- 751 120. Chu X, Zhang Z, Yabut J, Horwitz S, Levorse J, Li XQ, et al. Characterization of multidrug  
752 resistance 1a/P-glycoprotein knockout rats generated by zinc finger nucleases. *Mol Pharmacol.*  
753 2012;81(2):220-7. Epub 2011/11/04. doi: 10.1124/mol.111.074179. PubMed PMID: 22049154.
- 754 121. Zamek-Glisczynski MJ, Bedwell DW, Bao JQ, Higgins JW. Characterization of SAGE Mdr1a (P-  
755 gp), Bcrp, and Mrp2 knockout rats using loperamide, paclitaxel, sulfasalazine, and  
756 carboxydichlorofluorescein pharmacokinetics. *Drug Metab Dispos.* 2012;40(9):1825-33. Epub  
757 2012/06/20. doi: 10.1124/dmd.112.046508. PubMed PMID: 22711747.
- 758 122. Fuchs H, Kishimoto W, Gansser D, Tanswell P, Ishiguro N. Brain penetration of WEB 2086  
759 (Apafant) and dantrolene in Mdr1a (P-glycoprotein) and Bcrp knockout rats. *Drug Metab Dispos.*  
760 2014;42(10):1761-5. Epub 2014/07/24. doi: 10.1124/dmd.114.058545. PubMed PMID: 25053619.
- 761 123. Liu X, Cheong J, Ding X, Deshmukh G. Use of cassette dosing approach to examine the effects  
762 of P-glycoprotein on the brain and cerebrospinal fluid concentrations in wild-type and P-  
763 glycoprotein knockout rats. *Drug Metab Dispos.* 2014;42(4):482-91. Epub 2014/01/09. doi:  
764 dmd.113.055590 [pii]  
765 10.1124/dmd.113.055590. PubMed PMID: 24398459.
- 766 124. Wei Y, Yang L, Zhang X, Sui D, Wang C, Wang K, et al. Generation and Characterization of a  
767 CYP2C11-Null Rat Model by Using the CRISPR/Cas9 Method. *Drug Metab Dispos.* 2018;46(5):525-31.  
768 Epub 2018/02/16. doi: 10.1124/dmd.117.078444. PubMed PMID: 29444903.
- 769 125. Wang RL, Xia QQ, Baerson SR, Ren Y, Wang J, Su YJ, et al. A novel cytochrome P450  
770 CYP6AB14 gene in *Spodoptera litura* (Lepidoptera: Noctuidae) and its potential role in plant  
771 allelochemical detoxification. *J Insect Physiol.* 2015;75:54-62. Epub 2015/03/19. doi:  
772 10.1016/j.jinsphys.2015.02.013. PubMed PMID: 25783953.
- 773 126. Lu J, Shao Y, Qin X, Liu D, Chen A, Li D, et al. CRISPR knockout rat cytochrome P450 3A1/2  
774 model for advancing drug metabolism and pharmacokinetics research. *Sci Rep.* 2017;7:42922. Epub  
775 2017/02/22. doi: srep42922 [pii]  
776 10.1038/srep42922. PubMed PMID: 28218310.
- 777 127. Takeuchi T, Suzuki H, Sakurai S, Nogami H, Okuma S, Ishikawa H. Molecular mechanism of  
778 growth hormone (GH) deficiency in the spontaneous dwarf rat: detection of abnormal splicing of GH  
779 messenger ribonucleic acid by the polymerase chain reaction. *Endocrinology.* 1990;126(1):31-8.  
780 Epub 1990/01/01. doi: 10.1210/endo-126-1-31. PubMed PMID: 2152867.
- 781 128. Chikuda H, Kugimiya F, Hoshi K, Ikeda T, Ogasawara T, Shimoaka T, et al. Cyclic GMP-  
782 dependent protein kinase II is a molecular switch from proliferation to hypertrophic differentiation  
783 of chondrocytes. *Genes Dev.* 2004;18(19):2418-29. Epub 2004/10/07. doi: 10.1101/gad.1224204.  
784 PubMed PMID: 15466490; PubMed Central PMCID: PMC522991.  
785

- 786 129. Bonnet C, Andrieux J, Beri-Dexheimer M, Leheup B, Boute O, Manouvrier S, et al.  
787 Microdeletion at chromosome 4q21 defines a new emerging syndrome with marked growth  
788 restriction, mental retardation and absent or severely delayed speech. *J Med Genet.* 2010;47(6):377-  
789 84. Epub 2010/06/05. doi: 10.1136/jmg.2009.071902. PubMed PMID: 20522426.
- 790 130. Tsuchida A, Yokoi N, Namae M, Fuse M, Masuyama T, Sasaki M, et al. Phenotypic  
791 characterization of the Komeda miniature rat Ishikawa, an animal model of dwarfism caused by a  
792 mutation in *Prkg2*. *Comp Med.* 2008;58(6):560-7. Epub 2009/01/20. PubMed PMID: 19149413;  
793 PubMed Central PMCID: PMCPMC2710756.
- 794 131. Hishinuma A, Furudate S, Oh-Ishi M, Nagakubo N, Namatame T, Ieiri T. A novel missense  
795 mutation (G2320R) in thyroglobulin causes hypothyroidism in rdw rats. *Endocrinology.*  
796 2000;141(11):4050-5. Epub 2000/11/23. doi: 10.1210/endo.141.11.7794. PubMed PMID: 11089535.
- 797 132. Furudate S, Ono M, Shibayama K, Ohyama Y, Kuwada M, Kimura T, et al. Rescue from  
798 dwarfism by thyroid function compensation in rdw rats. *Exp Anim.* 2005;54(5):455-60. Epub  
799 2005/12/21. doi: 10.1538/expanim.54.455. PubMed PMID: 16365524.
- 800 133. Yu-Taeger L, Ott T, Bonsi P, Tomczak C, Wassouf Z, Martella G, et al. Impaired dopamine- and  
801 adenosine-mediated signaling and plasticity in a novel rodent model for DYT25 dystonia. *Neurobiol*  
802 *Dis.* 2020;134:104634. Epub 2019/11/05. doi: 10.1016/j.nbd.2019.104634. PubMed PMID:  
803 31678405.
- 804 134. Quina LA, Kuramoto T, Luquetti DV, Cox TC, Serikawa T, Turner EE. Deletion of a conserved  
805 regulatory element required for *Hmx1* expression in craniofacial mesenchyme in the dumbo rat: a  
806 newly identified cause of congenital ear malformation. *Dis Model Mech.* 2012;5(6):812-22. Epub  
807 2012/06/28. doi: 10.1242/dmm.009910. PubMed PMID: 22736458; PubMed Central PMCID:  
808 PMCPMC3484864.
- 809 135. Mori M, Li G, Hashimoto M, Nishio A, Tomozawa H, Suzuki N, et al. Pivotal Advance:  
810 Eosinophilia in the MES rat strain is caused by a loss-of-function mutation in the gene for  
811 cytochrome b(-245), alpha polypeptide (*Cyba*). *J Leukoc Biol.* 2009;86(3):473-8. Epub 2009/05/02.  
812 doi: 10.1189/jlb.1108715. PubMed PMID: 19406829.
- 813 136. Sarkisian MR, Li W, Di Cunto F, D'Mello SR, LoTurco JJ. Citron-kinase, a protein essential to  
814 cytokinesis in neuronal progenitors, is deleted in the flathead mutant rat. *J Neurosci.*  
815 2002;22(8):RC217. Epub 2002/04/05. doi: 20026283. PubMed PMID: 11932363; PubMed Central  
816 PMCID: PMCPMC6757530.
- 817 137. Sarkisian MR, Rattan S, D'Mello SR, LoTurco JJ. Characterization of seizures in the flathead  
818 rat: a new genetic model of epilepsy in early postnatal development. *Epilepsia.* 1999;40(4):394-400.  
819 Epub 1999/04/29. doi: 10.1111/j.1528-1157.1999.tb00732.x. PubMed PMID: 10219263.
- 820 138. Thomas AM, Schwartz MD, Saxe MD, Kilduff TS. *Cntnap2* Knockout Rats and Mice Exhibit  
821 Epileptiform Activity and Abnormal Sleep-Wake Physiology. *Sleep.* 2017;40(1). Epub 2017/04/02.  
822 doi: 10.1093/sleep/zsw026. PubMed PMID: 28364455.
- 823 139. Baulac S, Ishida S, Mashimo T, Boillot M, Fumoto N, Kuwamura M, et al. A rat model for  
824 LGI1-related epilepsies. *Hum Mol Genet.* 2012;21(16):3546-57. Epub 2012/05/17. doi:  
825 10.1093/hmg/dds184. PubMed PMID: 22589250.
- 826 140. Kinboshi M, Shimizu S, Mashimo T, Serikawa T, Ito H, Ikeda A, et al. Down-Regulation of  
827 Astrocytic Kir4.1 Channels during the Audiogenic Epileptogenesis in Leucine-Rich Glioma-Inactivated  
828 1 (*Lgi1*) Mutant Rats. *Int J Mol Sci.* 2019;20(5). Epub 2019/03/01. doi: 10.3390/ijms20051013.  
829 PubMed PMID: 30813600; PubMed Central PMCID: PMCPMC6429235.
- 830 141. Ishida S, Sakamoto Y, Nishio T, Baulac S, Kuwamura M, Ohno Y, et al. *Kcna1*-mutant rats  
831 dominantly display myokymia, neuromyotonia and spontaneous epileptic seizures. *Brain Res.*  
832 2012;1435:154-66. Epub 2011/12/31. doi: 10.1016/j.brainres.2011.11.023. PubMed PMID:  
833 22206926.
- 834 142. Mashimo T, Ohmori I, Ouchida M, Ohno Y, Tsurumi T, Miki T, et al. A missense mutation of  
835 the gene encoding voltage-dependent sodium channel (*Nav1.1*) confers susceptibility to febrile  
836 seizures in rats. *J Neurosci.* 2010;30(16):5744-53. Epub 2010/04/23. doi: 10.1523/JNEUROSCI.3360-  
837 09.2010. PubMed PMID: 20410126; PubMed Central PMCID: PMCPMC6632336.

- 838 143. Tokudome K, Okumura T, Shimizu S, Mashimo T, Takizawa A, Serikawa T, et al. Synaptic  
839 vesicle glycoprotein 2A (SV2A) regulates kindling epileptogenesis via GABAergic neurotransmission.  
840 Sci Rep. 2016;6:27420. Epub 2016/06/07. doi: 10.1038/srep27420. PubMed PMID: 27265781;  
841 PubMed Central PMCID: PMC4893657.
- 842 144. Miller JJ, Aoki K, Moehring F, Murphy CA, O'Hara CL, Tiemeyer M, et al. Neuropathic pain in a  
843 Fabry disease rat model. JCI Insight. 2018;3(6). Epub 2018/03/23. doi: 10.1172/jci.insight.99171.  
844 PubMed PMID: 29563343; PubMed Central PMCID: PMC5926911.
- 845 145. Bulbul M, Babygirija R, Zheng J, Ludwig K, Xu H, Lazar J, et al. Food intake and interdigestive  
846 gastrointestinal motility in ghrelin receptor mutant rats. J Gastroenterol. 2011;46(4):469-78. Epub  
847 2011/01/25. doi: 10.1007/s00535-010-0366-6. PubMed PMID: 21258824.
- 848 146. MacKay H, Charbonneau VR, St-Onge V, Murray E, Watts A, Wellman MK, et al. Rats with a  
849 truncated ghrelin receptor (GHSR) do not respond to ghrelin, and show reduced intake of palatable,  
850 high-calorie food. Physiol Behav. 2016;163:88-96. Epub 2016/05/01. doi:  
851 10.1016/j.physbeh.2016.04.048. PubMed PMID: 27129673.
- 852 147. Zallar LJ, Tunstall BJ, Richie CT, Zhang YJ, You ZB, Gardner EL, et al. Development and initial  
853 characterization of a novel ghrelin receptor CRISPR/Cas9 knockout wistar rat model. Int J Obes  
854 (Lond). 2019;43(2):344-54. Epub 2018/02/18. doi: 10.1038/s41366-018-0013-5. PubMed PMID:  
855 29453460; PubMed Central PMCID: PMC6066458.
- 856 148. Tian Y, Yang C, Shang S, Cai Y, Deng X, Zhang J, et al. Loss of FMRP Impaired Hippocampal  
857 Long-Term Plasticity and Spatial Learning in Rats. Front Mol Neurosci. 2017;10:269. Epub  
858 2017/09/13. doi: 10.3389/fnmol.2017.00269. PubMed PMID: 28894415; PubMed Central PMCID:  
859 PMC5581399.
- 860 149. Berzhanskaya J, Phillips MA, Shen J, Colonnese MT. Sensory hypo-excitability in a rat model  
861 of fetal development in Fragile X Syndrome. Sci Rep. 2016;6:30769. Epub 2016/07/29. doi:  
862 10.1038/srep30769. PubMed PMID: 27465362; PubMed Central PMCID: PMC4964352.
- 863 150. Golden CEM, Breen MS, Koro L, Sonar S, Niblo K, Browne A, et al. Deletion of the KH1  
864 Domain of Fmr1 Leads to Transcriptional Alterations and Attentional Deficits in Rats. Cereb Cortex.  
865 2019;29(5):2228-44. Epub 2019/03/17. doi: 10.1093/cercor/bhz029. PubMed PMID: 30877790;  
866 PubMed Central PMCID: PMC6458915.
- 867 151. Kiyozumi D, Nakano I, Takahashi KL, Hojo H, Aoyama H, Sekiguchi K. Fused pulmonary lobes  
868 is a rat model of human Fraser syndrome. Biochem Biophys Res Commun. 2011;411(2):440-4. Epub  
869 2011/07/16. doi: 10.1016/j.bbrc.2011.06.174. PubMed PMID: 21756877.
- 870 152. Kobayashi T, Kobayashi H, Goto T, Takashima T, Oikawa M, Ikeda H, et al. Germline  
871 development in rat revealed by visualization and deletion of Prdm14. Development. 2020. Epub  
872 2020/02/01. doi: 10.1242/dev.183798. PubMed PMID: 32001439.
- 873 153. Maichele AJ, Burwinkel B, Maire I, Sovik O, Kilimann MW. Mutations in the testis/liver  
874 isoform of the phosphorylase kinase gamma subunit (PHKG2) cause autosomal liver glycogenosis in  
875 the gsd rat and in humans. Nat Genet. 1996;14(3):337-40. Epub 1996/11/01. doi: 10.1038/ng1196-  
876 337. PubMed PMID: 8896567.
- 877 154. Kuramoto T, Kuwamura M, Tagami F, Mashimo T, Nose M, Serikawa T. Kyoto rhino rats  
878 derived by ENU mutagenesis undergo congenital hair loss and exhibit focal glomerulosclerosis. Exp  
879 Anim. 2011;60(1):57-63. Epub 2011/02/18. doi: 10.1538/expanim.60.57. PubMed PMID: 21325752.
- 880 155. Nanashima N, Akita M, Yamada T, Shimizu T, Nakano H, Fan Y, et al. The hairless phenotype  
881 of the Hirosaki hairless rat is due to the deletion of an 80-kb genomic DNA containing five basic  
882 keratin genes. J Biol Chem. 2008;283(24):16868-75. Epub 2008/04/19. doi:  
883 10.1074/jbc.M802539200. PubMed PMID: 18420582.
- 884 156. Kuramoto T, Hirano R, Kuwamura M, Serikawa T. Identification of the rat Rex mutation as a  
885 7-bp deletion at splicing acceptor site of the Krt71 gene. J Vet Med Sci. 2010;72(7):909-12. Epub  
886 2010/02/25. doi: 10.1292/jvms.09-0554. PubMed PMID: 20179389.
- 887 157. Ahearn K, Akkouris G, Berry PR, Chrisluis RR, Crooks IM, Dull AK, et al. The Charles River  
888 "hairless" rat mutation maps to chromosome 1: allelic with fuzzy and a likely orthologue of mouse

- 889 frizzy. *J Hered.* 2002;93(3):210-3. Epub 2002/08/27. doi: 10.1093/jhered/93.3.210. PubMed PMID:  
890 12195039.
- 891 158. Spacek DV, Perez AF, Ferranti KM, Wu LK, Moy DM, Magnan DR, et al. The mouse frizzy (fr)  
892 and rat 'hairless' (frCR) mutations are natural variants of protease serine S1 family member 8 (Prss8).  
893 *Exp Dermatol.* 2010;19(6):527-32. Epub 2010/03/06. doi: 10.1111/j.1600-0625.2009.01054.x.  
894 PubMed PMID: 20201958.
- 895 159. Asakawa M, Yoshioka T, Matsutani T, Hikita I, Suzuki M, Oshima I, et al. Association of a  
896 mutation in TRPV3 with defective hair growth in rodents. *J Invest Dermatol.* 2006;126(12):2664-72.  
897 Epub 2006/07/22. doi: 10.1038/sj.jid.5700468. PubMed PMID: 16858425.
- 898 160. Bartnikas TB, Wildt SJ, Wineinger AE, Schmitz-Abe K, Markianos K, Cooper DM, et al. A novel  
899 rat model of hereditary hemochromatosis due to a mutation in transferrin receptor 2. *Comp Med.*  
900 2013;63(2):143-55. Epub 2013/04/16. PubMed PMID: 23582421; PubMed Central PMCID:  
901 PMCPMC3625055.
- 902 161. Booth CJ, Brooks MB, Rockwell S, Murphy JW, Rinder HM, Zelterman D, et al. WAG-  
903 F8(m1Ycb) rats harboring a factor VIII gene mutation provide a new animal model for hemophilia A. *J*  
904 *Thromb Haemost.* 2010;8(11):2472-7. Epub 2010/07/16. doi: 10.1111/j.1538-7836.2010.03978.x.  
905 PubMed PMID: 20626616.
- 906 162. Nielsen LN, Wiinberg B, Hager M, Holmberg HL, Hansen JJ, Roepstorff K, et al. A novel F8 -/-  
907 rat as a translational model of human hemophilia A. *J Thromb Haemost.* 2014;12(8):1274-82. Epub  
908 2014/06/17. doi: 10.1111/jth.12635. PubMed PMID: 24931420.
- 909 163. Sorensen KR, Roepstorff K, Wiinberg B, Hansen AK, Tranholm M, Nielsen LN, et al. The F8(-/-)  
910 rat as a model of hemophilic arthropathy. *J Thromb Haemost.* 2016;14(6):1216-25. Epub  
911 2016/04/10. doi: 10.1111/jth.13328. PubMed PMID: 27060449.
- 912 164. Shi Q, Mattson JG, Fahs SA, Geurts AM, Weiler H, Montgomery RR. The severe spontaneous  
913 bleeding phenotype in a novel hemophilia A rat model is rescued by platelet FVIII expression. *Blood*  
914 *Adv.* 2020;4(1):55-65. Epub 2020/01/04. doi: 10.1182/bloodadvances.2019000944. PubMed PMID:  
915 31899798.
- 916 165. Zhang L, Shao Y, Li L, Tian F, Cen J, Chen X, et al. Efficient liver repopulation of transplanted  
917 hepatocyte prevents cirrhosis in a rat model of hereditary tyrosinemia type I. *Sci Rep.* 2016;6:31460.  
918 Epub 2016/08/12. doi: 10.1038/srep31460. PubMed PMID: 27510266; PubMed Central PMCID:  
919 PMCPMC4980609.
- 920 166. Shao Y, Wang L, Guo N, Wang S, Yang L, Li Y, et al. Cas9-nickase-mediated genome editing  
921 corrects hereditary tyrosinemia in rats. *J Biol Chem.* 2018;293(18):6883-92. Epub 2018/03/07. doi:  
922 10.1074/jbc.RA117.000347. PubMed PMID: 29507093; PubMed Central PMCID: PMCPMC5936814.
- 923 167. Oiso N, Riddle SR, Serikawa T, Kuramoto T, Spritz RA. The rat Ruby (R) locus is Rab38:  
924 identical mutations in Fawn-hooded and Tester-Moriyama rats derived from an ancestral Long Evans  
925 rat sub-strain. *Mamm Genome.* 2004;15(4):307-14. Epub 2004/04/28. doi: 10.1007/s00335-004-  
926 2337-9. PubMed PMID: 15112108.
- 927 168. Osanai K, Higuchi J, Oikawa R, Kobayashi M, Tsuchihara K, Iguchi M, et al. Altered lung  
928 surfactant system in a Rab38-deficient rat model of Hermansky-Pudlak syndrome. *Am J Physiol Lung*  
929 *Cell Mol Physiol.* 2010;298(2):L243-51. Epub 2009/11/10. doi: 10.1152/ajplung.00242.2009. PubMed  
930 PMID: 19897744.
- 931 169. Emmert AS, Iwasawa E, Shula C, Schultz P, Lindquist D, Dunn RS, et al. Impaired neural  
932 differentiation and glymphatic CSF flow in the Ccdc39 rat model of neonatal hydrocephalus: genetic  
933 interaction with L1cam. *Dis Model Mech.* 2019;12(11). Epub 2019/11/28. doi:  
934 10.1242/dmm.040972. PubMed PMID: 31771992.
- 935 170. Konishi S, Tanaka N, Mashimo T, Yamamoto T, Sakuma T, Kaneko T, et al. Pathological  
936 characteristics of Ccdc85c knockout rats: a rat model of genetic hydrocephalus. *Exp Anim.* 2019.  
937 Epub 2019/07/26. doi: 10.1538/expanim.19-0005. PubMed PMID: 31341137.
- 938 171. Emmert AS, Vuong SM, Shula C, Lindquist D, Yuan W, Hu YC, et al. Characterization of a novel  
939 rat model of X-linked hydrocephalus by CRISPR-mediated mutation in L1cam. *J Neurosurg.* 2019:1-  
940 14. Epub 2019/02/10. doi: 10.3171/2018.10.JNS181015. PubMed PMID: 30738385.

- 941 172. Wada M, Toh S, Taniguchi K, Nakamura T, Uchiumi T, Kohno K, et al. Mutations in the  
942 canalicular multispecific organic anion transporter (cMOAT) gene, a novel ABC transporter, in  
943 patients with hyperbilirubinemia II/Dubin-Johnson syndrome. *Hum Mol Genet.* 1998;7(2):203-7.  
944 Epub 1998/03/21. doi: 10.1093/hmg/7.2.203. PubMed PMID: 9425227.
- 945 173. Paulusma CC, Bosma PJ, Zaman GJ, Bakker CT, Otter M, Scheffer GL, et al. Congenital  
946 jaundice in rats with a mutation in a multidrug resistance-associated protein gene. *Science.*  
947 1996;271(5252):1126-8. Epub 1996/02/23. doi: 10.1126/science.271.5252.1126. PubMed PMID:  
948 8599091.
- 949 174. Ito K, Suzuki H, Hirohashi T, Kume K, Shimizu T, Sugiyama Y. Molecular cloning of canalicular  
950 multispecific organic anion transporter defective in EHBR. *Am J Physiol.* 1997;272(1 Pt 1):G16-22.  
951 Epub 1997/01/01. doi: 10.1152/ajpgi.1997.272.1.G16. PubMed PMID: 9038871.
- 952 175. Ma X, Shang X, Qin X, Lu J, Liu M, Wang X. Characterization of organic anion transporting  
953 polypeptide 1b2 knockout rats generated by CRISPR/Cas9: a novel model for drug transport and  
954 yperbilirubinemia disease. *Acta Pharmaceutica Sinica B.* 2020. Epub 2019/11/14. doi:  
955 10.1016/j.apsb.2019.11.007.
- 956 176. Iyanagi T. Molecular basis of multiple UDP-glucuronosyltransferase isoenzyme deficiencies in  
957 the hyperbilirubinemic rat (Gunn rat). *J Biol Chem.* 1991;266(35):24048-52. Epub 1991/12/15.  
958 PubMed PMID: 1748678.
- 959 177. Takahashi M, Ilan Y, Chowdhury NR, Guida J, Horwitz M, Chowdhury JR. Long term  
960 correction of bilirubin-UDP-glucuronosyltransferase deficiency in Gunn rats by administration of a  
961 recombinant adenovirus during the neonatal period. *J Biol Chem.* 1996;271(43):26536-42. Epub  
962 1996/10/25. doi: 10.1074/jbc.271.43.26536. PubMed PMID: 8900123.
- 963 178. Zhao Y, Yang Y, Xing R, Cui X, Xiao Y, Xie L, et al. Hyperlipidemia induces typical  
964 atherosclerosis development in Ldlr and Apoe deficient rats. *Atherosclerosis.* 2018;271:26-35. Epub  
965 2018/02/21. doi: 10.1016/j.atherosclerosis.2018.02.015. PubMed PMID: 29459263.
- 966 179. Phillips EH, Chang MS, Gorman S, Qureshi HJ, Ejendal KFK, Kinzer-Ursem TL, et al.  
967 Angiotensin infusion does not cause abdominal aortic aneurysms in apolipoprotein E-deficient rats. *J*  
968 *Vasc Res.* 2018;55:1-12.
- 969 180. Lee JG, Ha CH, Yoon B, Cheong SA, Kim G, Lee DJ, et al. Knockout rat models mimicking  
970 human atherosclerosis created by Cpf1-mediated gene targeting. *Sci Rep.* 2019;9(1):2628. Epub  
971 2019/02/24. doi: 10.1038/s41598-019-38732-2
- 972 10.1038/s41598-019-38732-2 [pii]. PubMed PMID: 30796231.
- 973 181. Asahina M, Mashimo T, Takeyama M, Tozawa R, Hashimoto T, Takizawa A, et al.  
974 Hypercholesterolemia and atherosclerosis in low density lipoprotein receptor mutant rats. *Biochem*  
975 *Biophys Res Commun.* 2012;418(3):553-8. Epub 2012/02/02. doi: 10.1016/j.bbrc.2012.01.067.  
976 PubMed PMID: 22293196.
- 977 182. Wang HY, Quan C, Hu C, Xie B, Du Y, Chen L, et al. A lipidomics study reveals hepatic lipid  
978 signatures associating with deficiency of the LDL receptor in a rat model. *Biol Open.* 2016;5(7):979-  
979 86. Epub 2016/07/06. doi: 10.1242/bio.019802. PubMed PMID: 27378433; PubMed Central PMCID:  
980 PMC4958281.
- 981 183. Asahina M, Haruyama W, Ichida Y, Sakamoto M, Sato M, Imaizumi K. Identification of SMEK2  
982 as a candidate gene for regulation of responsiveness to dietary cholesterol in rats. *J Lipid Res.*  
983 2009;50(1):41-6. Epub 2008/08/30. doi: 10.1194/jlr.M800135-JLR200. PubMed PMID: 18753676.
- 984 184. Liska F, Gosele C, Rivkin E, Tres L, Cardoso MC, Domaing P, et al. Rat hd mutation reveals an  
985 essential role of centrobilin in spermatid head shaping and assembly of the head-tail coupling  
986 apparatus. *Biol Reprod.* 2009a;81(6):1196-205. Epub 2009/08/28. doi: biolreprod.109.078980 [pii]
- 987 10.1095/biolreprod.109.078980. PubMed PMID: 19710508.
- 988 185. Kuramoto T, Yokoe M, Hashimoto R, Hiai H, Serikawa T. A rat model of hypohidrotic  
989 ectodermal dysplasia carries a missense mutation in the Edaradd gene. *BMC Genet.* 2011;12:91.

- 990 Epub 2011/10/22. doi: 10.1186/1471-2156-12-91. PubMed PMID: 22013926; PubMed Central  
991 PMCID: PMCPMC3224228.
- 992 186. Weber M, Wu T, Meilandt WJ, Dominguez SL, Solanoy HO, Maloney JA, et al. BACE1 across  
993 species: a comparison of the in vivo consequences of BACE1 deletion in mice and rats. *Sci Rep.*  
994 2017;7:44249. Epub 2017/03/11. doi: 10.1038/srep44249. PubMed PMID: 28281673; PubMed  
995 Central PMCID: PMCPMC5345047.
- 996 187. Yang J, Yi N, Zhang J, He W, He D, Wu W, et al. Generation and characterization of a  
997 hypothyroidism rat model with truncated thyroid stimulating hormone receptor. *Sci Rep.*  
998 2018;8(1):4004. Epub 2018/03/07. doi: 10.1038/s41598-018-22405-7. PubMed PMID: 29507327;  
999 PubMed Central PMCID: PMCPMC5838214.
- 1000 188. Jahoda CA, Kljuic A, O'Shaughnessy R, Crossley N, Whitehouse CJ, Robinson M, et al. The  
1001 lanceolate hair rat phenotype results from a missense mutation in a calcium coordinating site of the  
1002 desmoglein 4 gene. *Genomics.* 2004;83(5):747-56. Epub 2004/04/15. doi:  
1003 10.1016/j.ygeno.2003.11.015. PubMed PMID: 15081105.
- 1004 189. Bazzi H, Kljuic A, Christiano AM, Christiano AM, Panteleyev AA. Intragenic deletion in the  
1005 Desmoglein 4 gene underlies the skin phenotype in the Iffa Credo "hairless" rat. *Differentiation.*  
1006 2004;72(8):450-64. Epub 2004/12/21. doi: 10.1111/j.1432-0436.2004.07208010.x. PubMed PMID:  
1007 15606503.
- 1008 190. Meyer B, Bazzi H, Zidek V, Musilova A, Pravenec M, Kurtz TW, et al. A spontaneous mutation  
1009 in the desmoglein 4 gene underlies hypotrichosis in a new lanceolate hair rat model. *Differentiation.*  
1010 2004;72(9-10):541-7. Epub 2004/12/25. doi: 10.1111/j.1432-0436.2004.07209007.x. PubMed PMID:  
1011 15617564.
- 1012 191. Menoret S, Iscache AL, Tesson L, Remy S, Usal C, Osborn MJ, et al. Characterization of  
1013 immunoglobulin heavy chain knockout rats. *Eur J Immunol.* 2010;40(10):2932-41. Epub 2010/11/03.  
1014 doi: 10.1002/eji.201040939. PubMed PMID: 21038471.
- 1015 192. Osborn MJ, Ma B, Avis S, Binnie A, Dilley J, Yang X, et al. High-affinity IgG antibodies develop  
1016 naturally in Ig-knockout rats carrying germline human IgH/Igkappa/Iglambda loci bearing the rat CH  
1017 region. *J Immunol.* 2013;190(4):1481-90. Epub 2013/01/11. doi: 10.4049/jimmunol.1203041.  
1018 PubMed PMID: 23303672; PubMed Central PMCID: PMCPMC3566577.
- 1019 193. Nehls M, Pfeifer D, Schorpp M, Hedrich H, Boehm T. New member of the winged-helix  
1020 protein family disrupted in mouse and rat nude mutations. *Nature.* 1994;372(6501):103-7. Epub  
1021 1994/11/03. doi: 10.1038/372103a0. PubMed PMID: 7969402.
- 1022 194. Segre JA, Nemhauser JL, Taylor BA, Nadeau JH, Lander ES. Positional cloning of the nude  
1023 locus: genetic, physical, and transcription maps of the region and mutations in the mouse and rat.  
1024 *Genomics.* 1995;28(3):549-59. Epub 1995/08/10. doi: 10.1006/geno.1995.1187. PubMed PMID:  
1025 7490093.
- 1026 195. Goto T, Hara H, Nakauchi H, Hoshi S, Hirabayashi M. Hypomorphic phenotype of Foxn1  
1027 gene-modified rats by CRISPR/Cas9 system. *Transgenic Res.* 2016;25(4):533-44. Epub 2016/03/05.  
1028 doi: 10.1007/s11248-016-9941-9. PubMed PMID: 26931321.
- 1029 196. Mashimo T, Takizawa A, Kobayashi J, Kunihiro Y, Yoshimi K, Ishida S, et al. Generation and  
1030 characterization of severe combined immunodeficiency rats. *Cell Rep.* 2012;2(3):685-94. Epub  
1031 2012/09/18. doi: 10.1016/j.celrep.2012.08.009. PubMed PMID: 22981234.
- 1032 197. Beldick SR, Hong J, Altamentova S, Khazaei M, Hundal A, Zavvarian MM, et al. Severe-  
1033 combined immunodeficient rats can be used to generate a model of perinatal hypoxic-ischemic  
1034 brain injury to facilitate studies of engrafted human neural stem cells. *PLoS One.*  
1035 2018;13(11):e0208105. Epub 2018/11/30. doi: 10.1371/journal.pone.0208105. PubMed PMID:  
1036 30485360; PubMed Central PMCID: PMCPMC6261629.
- 1037 198. Zschemisch NH, Glage S, Wedekind D, Weinstein EJ, Cui X, Dorsch M, et al. Zinc-finger  
1038 nuclease mediated disruption of Rag1 in the LEW/Ztm rat. *BMC Immunol.* 2012;13:60. Epub  
1039 2012/11/10. doi: 10.1186/1471-2172-13-60. PubMed PMID: 23136839; PubMed Central PMCID:  
1040 PMCPMC3522011.

- 1041 199. Noto FK, Adjan-Steffey V, Tong M, Ravichandran K, Zhang W, Arey A, et al. Sprague Dawley  
1042 Rag2-Null Rats Created from Engineered Spermatogonial Stem Cells Are Immunodeficient and  
1043 Permissive to Human Xenografts. *Mol Cancer Ther.* 2018;17(11):2481-9. Epub 2018/09/13. doi:  
1044 10.1158/1535-7163.MCT-18-0156. PubMed PMID: 30206106; PubMed Central PMCID:  
1045 PMCPMC6215516.
- 1046 200. He D, Zhang J, Wu W, Yi N, He W, Lu P, et al. A novel immunodeficient rat model supports  
1047 human lung cancer xenografts. *FASEB J.* 2019;33(1):140-50. Epub 2018/06/27. doi:  
1048 10.1096/fj.201800102RR. PubMed PMID: 29944447.
- 1049 201. Mashimo T, Takizawa A, Voigt B, Yoshimi K, Hiai H, Kuramoto T, et al. Generation of  
1050 knockout rats with X-linked severe combined immunodeficiency (X-SCID) using zinc-finger nucleases.  
1051 *PLoS One.* 2010;5(1):e8870. Epub 2010/01/30. doi: 10.1371/journal.pone.0008870. PubMed PMID:  
1052 20111598; PubMed Central PMCID: PMCPMC2810328.
- 1053 202. Menoret S, Ouisse LH, Tesson L, Delbos F, Garnier D, Remy S, et al. Generation of  
1054 Immunodeficient Rats With Rag1 and Il2rg Gene Deletions and Human Tissue Grafting Models.  
1055 *Transplantation.* 2018;102(8):1271-8. Epub 2018/04/25. doi: 10.1097/TP.0000000000002251.  
1056 PubMed PMID: 29688994.
- 1057 203. Abdul-Majeed S, Mell B, Nauli SM, Joe B. Cryptorchidism and infertility in rats with targeted  
1058 disruption of the Adamts16 locus. *PLoS One.* 2014;9(7):e100967. Epub 2014/07/02. doi:  
1059 10.1371/journal.pone.0100967. PubMed PMID: 24983376; PubMed Central PMCID:  
1060 PMCPMC4077762.
- 1061 204. Yarbrough WG, Quarmby VE, Simental JA, Joseph DR, Sar M, Lubahn DB, et al. A single base  
1062 mutation in the androgen receptor gene causes androgen insensitivity in the testicular feminized rat.  
1063 *J Biol Chem.* 1990;265(15):8893-900. Epub 1990/05/25. PubMed PMID: 2341409.
- 1064 205. Ebihara C, Ebihara K, Aizawa-Abe M, Mashimo T, Tomita T, Zhao M, et al. Seipin is necessary  
1065 for normal brain development and spermatogenesis in addition to adipogenesis. *Hum Mol Genet.*  
1066 2015;24(15):4238-49. Epub 2015/05/03. doi: 10.1093/hmg/ddv156. PubMed PMID: 25934999.
- 1067 206. Zhang C, Zhou Y, Xie S, Yin Q, Tang C, Ni Z, et al. CRISPR/Cas9-mediated genome editing  
1068 reveals the synergistic effects of beta-defensin family members on sperm maturation in rat  
1069 epididymis. *FASEB J.* 2018;32(3):1354-63. Epub 2017/11/17. doi: 10.1096/fj.201700936R. PubMed  
1070 PMID: 29141997.
- 1071 207. Kawai Y, Noguchi J, Akiyama K, Takeno Y, Fujiwara Y, Kajita S, et al. A missense mutation of  
1072 the Dhh gene is associated with male pseudohermaphroditic rats showing impaired Leydig cell  
1073 development. *Reproduction.* 2011;141(2):217-25. Epub 2010/11/11. doi: 10.1530/REP-10-0006.  
1074 PubMed PMID: 21062903.
- 1075 208. Rumi MA, Dhakal P, Kubota K, Chakraborty D, Lei T, Larson MA, et al. Generation of Esr1-  
1076 knockout rats using zinc finger nuclease-mediated genome editing. *Endocrinology.*  
1077 2014;155(5):1991-9. Epub 2014/02/11. doi: 10.1210/en.2013-2150. PubMed PMID: 24506075;  
1078 PubMed Central PMCID: PMCPMC3990838.
- 1079 209. Rumi MAK, Singh P, Roby KF, Zhao X, Iqbal K, Ratri A, et al. Defining the Role of Estrogen  
1080 Receptor beta in the Regulation of Female Fertility. *Endocrinology.* 2017;158(7):2330-43. Epub  
1081 2017/05/19. doi: 10.1210/en.2016-1916. PubMed PMID: 28520870; PubMed Central PMCID:  
1082 PMCPMC5505218.
- 1083 210. Khristi V, Chakravarthi VP, Singh P, Ghosh S, Pramanik A, Ratri A, et al. ESR2 regulates  
1084 granulosa cell genes essential for follicle maturation and ovulation. *Mol Cell Endocrinol.*  
1085 2018;474:214-26. Epub 2018/03/28. doi: 10.1016/j.mce.2018.03.012. PubMed PMID: 29580824.
- 1086 211. Khristi V, Ghosh S, Chakravarthi VP, Wolfe MW, Rumi MAK. Transcriptome data analyses of  
1087 prostatic hyperplasia in Esr2 knockout rats. *Data Brief.* 2019;24:103826. Epub 2019/04/25. doi:  
1088 10.1016/j.dib.2019.103826. PubMed PMID: 31016213; PubMed Central PMCID: PMCPMC6475810.
- 1089 212. Uenoyama Y, Nakamura S, Hayakawa Y, Ikegami K, Watanabe Y, Deura C, et al. Lack of pulse  
1090 and surge modes and glutamatergic stimulation of luteinising hormone release in Kiss1 knockout  
1091 rats. *J Neuroendocrinol.* 2015;27(3):187-97. Epub 2015/01/15. doi: 10.1111/jne.12257. PubMed  
1092 PMID: 25582792.



- 1093 213. Liska F, Chylikova B, Janku M, Seda O, Vernerova Z, Pravenec M, et al. Splicing mutation in  
1094 Sbf1 causes nonsyndromic male infertility in the rat. *Reproduction*. 2016;152(3):215-23. Epub  
1095 2016/06/24. doi: REP-16-0042 [pii]  
  
1096 10.1530/REP-16-0042. PubMed PMID: 27335132.  
1097 214. Ishishita S, Inui T, Matsuda Y, Serikawa T, Kitada K. Infertility associated with meiotic failure  
1098 in the tremor rat (tm/tm) is caused by the deletion of spermatogenesis associated 22. *Exp Anim*.  
1099 2013;62(3):219-27. Epub 2013/08/02. doi: 10.1538/expanim.62.219. PubMed PMID: 23903057;  
1100 PubMed Central PMCID: PMCPMC4160939.  
1101 215. Mul JD, Nadra K, Jagalur NB, Nijman IJ, Toonen PW, Medard JJ, et al. A hypomorphic  
1102 mutation in Lpin1 induces progressively improving neuropathy and lipodystrophy in the rat. *J Biol*  
1103 *Chem*. 2011;286(30):26781-93. Epub 2011/07/01. doi: 10.1074/jbc.M110.197947. PubMed PMID:  
1104 21715287; PubMed Central PMCID: PMCPMC3143639.  
1105 216. Chabod M, Pedros C, Lamouroux L, Colacios C, Bernard I, Lagrange D, et al. A spontaneous  
1106 mutation of the rat Themis gene leads to impaired function of regulatory T cells linked to  
1107 inflammatory bowel disease. *PLoS Genet*. 2012;8(1):e1002461. Epub 2012/01/26. doi:  
1108 10.1371/journal.pgen.1002461. PubMed PMID: 22275874; PubMed Central PMCID:  
1109 PMCPMC3261907.  
1110 217. Shaheen R, Hashem A, Abdel-Salam GM, Al-Fadhli F, Ewida N, Alkuraya FS. Mutations in CIT,  
1111 encoding citron rho-interacting serine/threonine kinase, cause severe primary microcephaly in  
1112 humans. *Hum Genet*. 2016;135(10):1191-7. Epub 2016/08/10. doi: 10.1007/s00439-016-1722-2.  
1113 PubMed PMID: 27503289.  
1114 218. van Boxtel R, Vroliing B, Toonen P, Nijman IJ, van Roekel H, Verheul M, et al. Systematic  
1115 generation of in vivo G protein-coupled receptor mutants in the rat. *Pharmacogenomics J*.  
1116 2011;11(5):326-36. Epub 2010/06/10. doi: 10.1038/tpj.2010.44. PubMed PMID: 20531371; PubMed  
1117 Central PMCID: PMCPMC3194067.  
1118 219. Marsan E, Ishida S, Schramm A, Weckhuysen S, Muraca G, Lecas S, et al. Depdc5 knockout  
1119 rat: A novel model of mTORopathy. *Neurobiol Dis*. 2016;89:180-9. Epub 2016/02/14. doi:  
1120 10.1016/j.nbd.2016.02.010. PubMed PMID: 26873552.  
1121 220. Kunieda T, Simonaro CM, Yoshida M, Ikadai H, Levan G, Desnick RJ, et al.  
1122 Mucopolysaccharidosis type VI in rats: isolation of cDNAs encoding arylsulfatase B, chromosomal  
1123 localization of the gene, and identification of the mutation. *Genomics*. 1995;29(3):582-7. Epub  
1124 1995/10/10. doi: 10.1006/geno.1995.9962. PubMed PMID: 8575749.  
1125 221. Eliyahu E, Wolfson T, Ge Y, Jepsen KJ, Schuchman EH, Simonaro CM. Anti-TNF-alpha therapy  
1126 enhances the effects of enzyme replacement therapy in rats with mucopolysaccharidosis type VI.  
1127 *PLoS One*. 2011;6(8):e22447. Epub 2011/09/03. doi: 10.1371/journal.pone.0022447. PubMed PMID:  
1128 21887218; PubMed Central PMCID: PMCPMC3159569.  
1129 222. Yang X, Lu D, Zhang X, Chen W, Gao S, Dong W, et al. Knockout of ISCA1 causes early  
1130 embryonic death in rats. *Animal Model Exp Med*. 2019;2(1):18-24. Epub 2019/04/25. doi:  
1131 10.1002/ame2.12059. PubMed PMID: 31016283; PubMed Central PMCID: PMCPMC6431120.  
1132 223. Fan F, Geurts AM, Pabbidi MR, Smith SV, Harder DR, Jacob H, et al. Zinc-finger nuclease  
1133 knockout of dual-specificity protein phosphatase-5 enhances the myogenic response and  
1134 autoregulation of cerebral blood flow in FHH.1BN rats. *PLoS One*. 2014;9(11):e112878. Epub  
1135 2014/11/15. doi: 10.1371/journal.pone.0112878. PubMed PMID: 25397684; PubMed Central  
1136 PMCID: PMCPMC4232417.  
1137 224. Zigler JS, Jr., Hodgkinson CA, Wright M, Klise A, Sundin O, Broman KW, et al. A Spontaneous  
1138 Missense Mutation in Branched Chain Keto Acid Dehydrogenase Kinase in the Rat Affects Both the  
1139 Central and Peripheral Nervous Systems. *PLoS One*. 2016;11(7):e0160447. Epub 2016/07/30. doi:  
1140 10.1371/journal.pone.0160447. PubMed PMID: 27472223; PubMed Central PMCID:  
1141 PMCPMC4966912.  
1142 225. Xu J, Zhang L, Xie M, Li Y, Huang P, Saunders TL, et al. Role of Complement in a Rat Model of  
1143 Paclitaxel-Induced Peripheral Neuropathy. *J Immunol*. 2018;200(12):4094-101. Epub 2018/04/27.

- 1144 doi: 10.4049/jimmunol.1701716. PubMed PMID: 29695418; PubMed Central PMCID:  
1145 PMCPMC5988965.
- 1146 226. Wiedemann T, Bielohuby M, Muller TD, Bidlingmaier M, Pellegata NS. Obesity in MENX Rats  
1147 Is Accompanied by High Circulating Levels of Ghrelin and Improved Insulin Sensitivity. *Diabetes*.  
1148 2016;65(2):406-20. Epub 2015/10/30. doi: 10.2337/db15-0374. PubMed PMID: 26512025.
- 1149 227. Aizawa-Abe M, Ebihara K, Ebihara C, Mashimo T, Takizawa A, Tomita T, et al. Generation of  
1150 leptin-deficient Lepmkyo/Lepmkyo rats and identification of leptin-responsive genes in the liver.  
1151 *Physiol Genomics*. 2013;45(17):786-93. Epub 2013/06/27. doi:  
1152 10.1152/physiolgenomics.00040.2013. PubMed PMID: 23800849.
- 1153 228. Vaira S, Yang C, McCoy A, Keys K, Xue S, Weinstein EJ, et al. Creation and preliminary  
1154 characterization of a leptin knockout rat. *Endocrinology*. 2012;153(11):5622-8. Epub 2012/09/06.  
1155 doi: 10.1210/en.2012-1462. PubMed PMID: 22948215; PubMed Central PMCID: PMCPMC3473197.
- 1156 229. Wu-Peng XS, Chua SC, Jr., Okada N, Liu SM, Nicolson M, Leibel RL. Phenotype of the obese  
1157 Koletsky (f) rat due to Tyr763Stop mutation in the extracellular domain of the leptin receptor (Lepr):  
1158 evidence for deficient plasma-to-CSF transport of leptin in both the Zucker and Koletsky obese rat.  
1159 *Diabetes*. 1997;46(3):513-8. Epub 1997/03/01. doi: 10.2337/diab.46.3.513. PubMed PMID: 9032111.
- 1160 230. Chua SC, Jr., White DW, Wu-Peng XS, Liu SM, Okada N, Kershaw EE, et al. Phenotype of fatty  
1161 due to Gln269Pro mutation in the leptin receptor (Lepr). *Diabetes*. 1996;45(8):1141-3. Epub  
1162 1996/08/01. doi: 10.2337/diab.45.8.1141. PubMed PMID: 8690163.
- 1163 231. Bao D, Ma Y, Zhang X, Guan F, Chen W, Gao K, et al. Preliminary Characterization of a Leptin  
1164 Receptor Knockout Rat Created by CRISPR/Cas9 System. *Sci Rep*. 2015;5:15942. Epub 2015/11/06.  
1165 doi: 10.1038/srep15942. PubMed PMID: 26537785; PubMed Central PMCID: PMCPMC4633582.
- 1166 232. Mul JD, van Boxtel R, Bergen DJ, Brans MA, Brakkee JH, Toonen PW, et al. Melanocortin  
1167 receptor 4 deficiency affects body weight regulation, grooming behavior, and substrate preference  
1168 in the rat. *Obesity (Silver Spring)*. 2012;20(3):612-21. Epub 2011/04/30. doi: 10.1038/oby.2011.81.  
1169 PubMed PMID: 21527895; PubMed Central PMCID: PMCPMC3286758.
- 1170 233. Katayama K, Sasaki T, Goto S, Ogasawara K, Maru H, Suzuki K, et al. Insertional mutation in  
1171 the *Golgb1* gene is associated with osteochondrodysplasia and systemic edema in the OCD rat.  
1172 *Bone*. 2011;49(5):1027-36. Epub 2011/08/20. doi: 10.1016/j.bone.2011.08.001. PubMed PMID:  
1173 21851869.
- 1174 234. Van Wesenbeeck L, Odgren PR, Coxon FP, Frattini A, Moens P, Perdu B, et al. Involvement of  
1175 PLEKHM1 in osteoclastic vesicular transport and osteopetrosis in incisors absent rats and humans. *J*  
1176 *Clin Invest*. 2007;117(4):919-30. Epub 2007/04/04. doi: 10.1172/JCI30328. PubMed PMID:  
1177 17404618; PubMed Central PMCID: PMCPMC1838941.
- 1178 235. Ubles JL, Diegel CR, Foxa GE, Ethen NJ, Lensing JN, Madaj ZB, et al. Low-density Lipoprotein  
1179 Receptor-related Protein 5 (LRP5)-deficient Rats Have Reduced Bone Mass and Abnormal  
1180 Development of the Retinal Vasculature. *bioRxiv*. 2020. doi: 10.1101/2020.01.06.895797.
- 1181 236. Baptista MA, Dave KD, Frasier MA, Sherer TB, Greeley M, Beck MJ, et al. Loss of leucine-rich  
1182 repeat kinase 2 (LRRK2) in rats leads to progressive abnormal phenotypes in peripheral organs. *PLoS*  
1183 *One*. 2013;8(11):e80705. Epub 2013/11/19. doi: 10.1371/journal.pone.0080705. PubMed PMID:  
1184 24244710; PubMed Central PMCID: PMCPMC3828242.
- 1185 237. Ness D, Ren Z, Gardai S, Sharpnack D, Johnson VJ, Brennan RJ, et al. Leucine-rich repeat  
1186 kinase 2 (LRRK2)-deficient rats exhibit renal tubule injury and perturbations in metabolic and  
1187 immunological homeostasis. *PLoS One*. 2013;8(6):e66164. Epub 2013/06/27. doi:  
1188 10.1371/journal.pone.0066164. PubMed PMID: 23799078; PubMed Central PMCID:  
1189 PMCPMC3682960.
- 1190 238. Rouillard C, Baillargeon J, Paquet B, St-Hilaire M, Maheux J, Levesque C, et al. Genetic  
1191 disruption of the nuclear receptor Nur77 (Nr4a1) in rat reduces dopamine cell loss and l-Dopa-  
1192 induced dyskinesia in experimental Parkinson's disease. *Exp Neurol*. 2018;304:143-53. Epub  
1193 2018/03/14. doi: 10.1016/j.expneurol.2018.03.008. PubMed PMID: 29530712.
- 1194 239. Sun J, Kouranova E, Cui X, Mach RH, Xu J. Regulation of dopamine presynaptic markers and  
1195 receptors in the striatum of DJ-1 and Pink1 knockout rats. *Neurosci Lett*. 2013;557 Pt B:123-8. Epub

- 1196 2013/10/26. doi: 10.1016/j.neulet.2013.10.034. PubMed PMID: 24157858; PubMed Central PMCID:  
1197 PMCPMC4144334.
- 1198 240. Dave KD, De Silva S, Sheth NP, Ramboz S, Beck MJ, Quang C, et al. Phenotypic  
1199 characterization of recessive gene knockout rat models of Parkinson's disease. *Neurobiol Dis.*  
1200 2014;70:190-203. Epub 2014/06/28. doi: 10.1016/j.nbd.2014.06.009. PubMed PMID: 24969022.
- 1201 241. Villeneuve LM, Purnell PR, Boska MD, Fox HS. Early Expression of Parkinson's Disease-  
1202 Related Mitochondrial Abnormalities in PINK1 Knockout Rats. *Mol Neurobiol.* 2016;53(1):171-86.  
1203 Epub 2014/11/26. doi: 10.1007/s12035-014-8927-y. PubMed PMID: 25421206; PubMed Central  
1204 PMCID: PMCPMC4442772.
- 1205 242. Guatteo E, Rizzo FR, Federici M, Cordella A, Ledonne A, Latini L, et al. Functional alterations  
1206 of the dopaminergic and glutamatergic systems in spontaneous alpha-synuclein overexpressing rats.  
1207 *Exp Neurol.* 2017;287(Pt 1):21-33. Epub 2016/10/28. doi: 10.1016/j.expneurol.2016.10.009. PubMed  
1208 PMID: 27771352.
- 1209 243. Stoica G, Lungu G, Bjorklund NL, Tagliatela G, Zhang X, Chiu V, et al. Potential role of alpha-  
1210 synuclein in neurodegeneration: studies in a rat animal model. *J Neurochem.* 2012;122(4):812-22.  
1211 Epub 2012/05/30. doi: 10.1111/j.1471-4159.2012.07805.x. PubMed PMID: 22639889.
- 1212 244. Kuramoto T, Gohma H, Kimura K, Wedekind D, Hedrich HJ, Serikawa T. The rat pink-eyed  
1213 dilution (p) mutation: an identical intragenic deletion in pink-eye dilute-coat strains and several  
1214 Wistar-derived albino strains. *Mamm Genome.* 2005;16(9):712-9. Epub 2005/10/26. doi:  
1215 10.1007/s00335-005-0061-8. PubMed PMID: 16245028.
- 1216 245. Brown JH, Bihoreau MT, Hoffmann S, Kranzlin B, Tychinskaya I, Obermuller N, et al. Missense  
1217 mutation in sterile alpha motif of novel protein SamCystin is associated with polycystic kidney  
1218 disease in (cy/+) rat. *J Am Soc Nephrol.* 2005;16(12):3517-26. Epub 2005/10/07. doi:  
1219 10.1681/ASN.2005060601. PubMed PMID: 16207829.
- 1220 246. Neudecker S, Walz R, Menon K, Maier E, Bihoreau MT, Obermuller N, et al. Transgenic  
1221 overexpression of Anks6(p.R823W) causes polycystic kidney disease in rats. *Am J Pathol.*  
1222 2010;177(6):3000-9. Epub 2010/12/02. doi: 10.2353/ajpath.2010.100569. PubMed PMID: 21119215;  
1223 PubMed Central PMCID: PMCPMC2993307.
- 1224 247. Hoff S, Halbritter J, Epting D, Frank V, Nguyen TM, van Reeuwijk J, et al. ANKS6 is a central  
1225 component of a nephronophthisis module linking NEK8 to INVS and NPHP3. *Nat Genet.*  
1226 2013;45(8):951-6. Epub 2013/06/26. doi: 10.1038/ng.2681. PubMed PMID: 23793029; PubMed  
1227 Central PMCID: PMCPMC3786259.
- 1228 248. McCooke JK, Appels R, Barrero RA, Ding A, Ozimek-Kulik JE, Bellgard MI, et al. A novel  
1229 mutation causing nephronophthisis in the Lewis polycystic kidney rat localises to a conserved RCC1  
1230 domain in Nek8. *BMC Genomics.* 2012;13:393. Epub 2012/08/18. doi: 10.1186/1471-2164-13-393.  
1231 PubMed PMID: 22899815; PubMed Central PMCID: PMCPMC3441220.
- 1232 249. Arkhipov SN, Potter DL, Geurts AM, Pavlov TS. Knockout of P2rx7 purinergic receptor  
1233 attenuates cyst growth in a rat model of ARPKD. *Am J Physiol Renal Physiol.* 2019;317(6):F1649-F55.  
1234 Epub 2019/10/22. doi: 10.1152/ajprenal.00395.2019. PubMed PMID: 31630543.
- 1235 250. Ward CJ, Hogan MC, Rossetti S, Walker D, Sneddon T, Wang X, et al. The gene mutated in  
1236 autosomal recessive polycystic kidney disease encodes a large, receptor-like protein. *Nat Genet.*  
1237 2002;30(3):259-69. Epub 2002/03/29. doi: 10.1038/ng833. PubMed PMID: 11919560.
- 1238 251. Smith UM, Consugar M, Tee LJ, McKee BM, Maina EN, Whelan S, et al. The transmembrane  
1239 protein meckelin (MKS3) is mutated in Meckel-Gruber syndrome and the wpk rat. *Nat Genet.*  
1240 2006;38(2):191-6. Epub 2006/01/18. doi: 10.1038/ng1713. PubMed PMID: 16415887.
- 1241 252. Liska F, Snajdr P, Sedova L, Seda O, Chylikova B, Slamova P, et al. Deletion of a conserved  
1242 noncoding sequence in Plzf intron leads to Plzf down-regulation in limb bud and polydactyly in the  
1243 rat. *Dev Dyn.* 2009b;238(3):673-84. Epub 2009/02/05. doi: 10.1002/dvdy.21859. PubMed PMID:  
1244 19191224.
- 1245 253. Liska F, Peterkova R, Peterka M, Landa V, Zidek V, Mlejnek P, et al. Targeting of the Plzf Gene  
1246 in the Rat by Transcription Activator-Like Effector Nuclease Results in Caudal Regression Syndrome

- 1247 in Spontaneously Hypertensive Rats. PLoS One. 2016;11(10):e0164206. Epub 2016/10/12. doi:  
1248 10.1371/journal.pone.0164206
- 1249 PONE-D-16-20235 [pii]. PubMed PMID: 27727328.  
1250 254. Li Q, Kingman J, van de Wetering K, Tannouri S, Sundberg JP, Uitto J. Abcc6 Knockout Rat  
1251 Model Highlights the Role of Liver in PPI Homeostasis in Pseudoxanthoma Elasticum. J Invest  
1252 Dermatol. 2017;137(5):1025-32. Epub 2017/01/24. doi: S0022-202X(17)30033-7 [pii]  
1253 10.1016/j.jid.2016.11.042. PubMed PMID: 28111129.  
1254 255. Yu D, Zhong Y, Li X, Li Y, Li X, Cao J, et al. Generation of TALEN-mediated FH knockout rat  
1255 model. Oncotarget. 2016;7(38):61656-69. Epub 2016/08/25. doi: 10.18632/oncotarget.11429.  
1256 PubMed PMID: 27556703; PubMed Central PMCID: PMC5308680.  
1257 256. D'Cruz PM, Yasumura D, Weir J, Matthes MT, Abderrahim H, LaVail MM, et al. Mutation of  
1258 the receptor tyrosine kinase gene *Mertk* in the retinal dystrophic RCS rat. Hum Mol Genet.  
1259 2000;9(4):645-51. Epub 2000/03/04. doi: 10.1093/hmg/9.4.645. PubMed PMID: 10699188.  
1260 257. Ostergaard E, Duno M, Batbayli M, Vilhelmsen K, Rosenberg T. A novel *MERTK* deletion is a  
1261 common founder mutation in the Faroe Islands and is responsible for a high proportion of retinitis  
1262 pigmentosa cases. Mol Vis. 2011;17:1485-92. Epub 2011/06/17. doi: 167 [pii]. PubMed PMID:  
1263 21677792; PubMed Central PMCID: PMC3110495.  
1264 258. Vollrath D, Feng W, Duncan JL, Yasumura D, D'Cruz PM, Chappelow A, et al. Correction of the  
1265 retinal dystrophy phenotype of the RCS rat by viral gene transfer of *Mertk*. Proc Natl Acad Sci U S A.  
1266 2001;98(22):12584-9. Epub 2001/10/11. doi: 10.1073/pnas.221364198. PubMed PMID: 11592982;  
1267 PubMed Central PMCID: PMC60097.  
1268 259. Zhao M, Andrieu-Soler C, Kowalczyk L, Paz Cortes M, Berdugo M, Dernigoghossian M, et al. A  
1269 new *CRB1* rat mutation links Muller glial cells to retinal telangiectasia. J Neurosci. 2015;35(15):6093-  
1270 106. Epub 2015/04/17. doi: 10.1523/JNEUROSCI.3412-14.2015. PubMed PMID: 25878282; PubMed  
1271 Central PMCID: PMC4397606.  
1272 260. Yeo JH, Jung BK, Lee H, Baek IJ, Sung YH, Shin HS, et al. Development of a *Pde6b* Gene  
1273 Knockout Rat Model for Studies of Degenerative Retinal Diseases. Invest Ophthalmol Vis Sci.  
1274 2019;60(5):1519-26. Epub 2019/04/23. doi: 10.1167/iovs.18-25556. PubMed PMID: 31009522.  
1275 261. Patterson KC, Hawkins VE, Arps KM, Mulkey DK, Olsen ML. *MeCP2* deficiency results in  
1276 robust Rett-like behavioural and motor deficits in male and female rats. Hum Mol Genet.  
1277 2016;25(24):5514-5. Epub 2017/02/16. doi: 10.1093/hmg/ddw435. PubMed PMID: 28201743;  
1278 PubMed Central PMCID: PMC5953509.  
1279 262. Patterson KC, Hawkins VE, Arps KM, Mulkey DK, Olsen ML. *MeCP2* deficiency results in  
1280 robust Rett-like behavioural and motor deficits in male and female rats. Hum Mol Genet.  
1281 2016;25(15):3303-20. Epub 2016/06/23. doi: ddw179 [pii]  
1282 10.1093/hmg/ddw179. PubMed PMID: 27329765.  
1283 263. Wu Y, Zhong W, Cui N, Johnson CM, Xing H, Zhang S, et al. Characterization of Rett  
1284 Syndrome-like phenotypes in *Mecp2*-knockout rats. J Neurodev Disord. 2016;8:23. Epub  
1285 2016/06/18. doi: 10.1186/s11689-016-9156-7. PubMed PMID: 27313794; PubMed Central PMCID:  
1286 PMC4910223.  
1287 264. Chen J, Batta A, Zheng S, Fitzgibbon WR, Ullian ME, Yu H, et al. The missense mutation in  
1288 *Abcg5* gene in spontaneously hypertensive rats (SHR) segregates with phytosterolemia but not  
1289 hypertension. BMC Genet. 2005;6:40. Epub 2005/07/20. doi: 10.1186/1471-2156-6-40. PubMed  
1290 PMID: 16026620; PubMed Central PMCID: PMC1190168.  
1291 265. Umeda T, Takashima N, Nakagawa R, Maekawa M, Ikegami S, Yoshikawa T, et al. Evaluation  
1292 of *Pax6* mutant rat as a model for autism. PLoS One. 2010;5(12):e15500. Epub 2011/01/05. doi:  
1293 10.1371/journal.pone.0015500. PubMed PMID: 21203536; PubMed Central PMCID:  
1294 PMC3006426.

- 1295 266. Matsuo T, Osumi-Yamashita N, Noji S, Ohuchi H, Koyama E, Myokai F, et al. A mutation in  
1296 the Pax-6 gene in rat small eye is associated with impaired migration of midbrain crest cells. *Nat*  
1297 *Genet.* 1993;3(4):299-304. Epub 1993/04/01. doi: 10.1038/ng0493-299. PubMed PMID: 7981749.
- 1298 267. Abe K, Takamatsu N, Ishikawa K, Tsurumi T, Tanimoto S, Sakurai Y, et al. Novel ENU-Induced  
1299 Mutation in Tbx6 Causes Dominant Spondylocostal Dysostosis-Like Vertebral Malformations in the  
1300 Rat. *PLoS One.* 2015;10(6):e0130231. Epub 2015/06/20. doi: 10.1371/journal.pone.0130231.  
1301 PubMed PMID: 26090680; PubMed Central PMCID: PMC4474719.
- 1302 268. Suzuki H, Ito Y, Shinohara M, Yamashita S, Ichinose S, Kishida A, et al. Gene targeting of the  
1303 transcription factor Mohawk in rats causes heterotopic ossification of Achilles tendon via failed  
1304 tenogenesis. *Proc Natl Acad Sci U S A.* 2016;113(28):7840-5. Epub 2016/07/03. doi:  
1305 10.1073/pnas.1522054113. PubMed PMID: 27370800; PubMed Central PMCID: PMC4948356.
- 1306 269. Northrup E, Zschemisch NH, Eisenblatter R, Glage S, Wedekind D, Cuppen E, et al. The ter  
1307 mutation in the rat Dnd1 gene initiates gonadal teratomas and infertility in both genders. *PLoS One.*  
1308 2012;7(5):e38001. Epub 2012/06/02. doi: 10.1371/journal.pone.0038001. PubMed PMID: 22655094;  
1309 PubMed Central PMCID: PMC3360017.
- 1310 270. Asano A, Tsubomatsu K, Jung CG, Sasaki N, Agui T. A deletion mutation of the protein  
1311 tyrosine phosphatase kappa (Ptpkr) gene is responsible for T-helper immunodeficiency (thid) in the  
1312 LEC rat. *Mamm Genome.* 2007;18(11):779-86. Epub 2007/10/03. doi: 10.1007/s00335-007-9062-0.  
1313 PubMed PMID: 17909891.
- 1314 271. Kose H, Sakai T, Tsukumo S, Wei K, Yamada T, Yasutomo K, et al. Maturational arrest of  
1315 thymocyte development is caused by a deletion in the receptor-like protein tyrosine phosphatase  
1316 kappa gene in LEC rats. *Genomics.* 2007;89(6):673-7. Epub 2007/04/17. doi:  
1317 10.1016/j.ygeno.2007.03.001. PubMed PMID: 17434290.
- 1318 272. Van Wesenbeeck L, Odgren PR, MacKay CA, D'Angelo M, Safadi FF, Popoff SN, et al. The  
1319 osteopetrotic mutation toothless (tl) is a loss-of-function frameshift mutation in the rat Csf1 gene:  
1320 Evidence of a crucial role for CSF-1 in osteoclastogenesis and endochondral ossification. *Proc Natl*  
1321 *Acad Sci U S A.* 2002;99(22):14303-8. Epub 2002/10/16. doi: 10.1073/pnas.202332999. PubMed  
1322 PMID: 12379742; PubMed Central PMCID: PMC137879.
- 1323 273. Dobbins DE, Sood R, Hashiramoto A, Hansen CT, Wilder RL, Remmers EF. Mutation of  
1324 macrophage colony stimulating factor (Csf1) causes osteopetrosis in the tl rat. *Biochem Biophys Res*  
1325 *Commun.* 2002;294(5):1114-20. Epub 2002/06/21. doi: 10.1016/S0006-291X(02)00598-3. PubMed  
1326 PMID: 12074592.
- 1327 274. Taguchi K, Takaku M, Egner PA, Morita M, Kaneko T, Mashimo T, et al. Generation of a New  
1328 Model Rat: Nrf2 Knockout Rats Are Sensitive to Aflatoxin B1 Toxicity. *Toxicol Sci.* 2016;152(1):40-52.  
1329 Epub 2016/04/14. doi: 10.1093/toxsci/kfw065. PubMed PMID: 27071940; PubMed Central PMCID:  
1330 PMC4922541.
- 1331 275. Newman ZL, Printz MP, Liu S, Crown D, Breen L, Miller-Randolph S, et al. Susceptibility to  
1332 anthrax lethal toxin-induced rat death is controlled by a single chromosome 10 locus that includes  
1333 rNlrp1. *PLoS Pathog.* 2010;6(5):e1000906. Epub 2010/05/27. doi: 10.1371/journal.ppat.1000906.  
1334 PubMed PMID: 20502689; PubMed Central PMCID: PMC2873920.
- 1335 276. Cirelli KM, Gorfu G, Hassan MA, Printz M, Crown D, Leppla SH, et al. Inflammasome sensor  
1336 NLRP1 controls rat macrophage susceptibility to *Toxoplasma gondii*. *PLoS Pathog.*  
1337 2014;10(3):e1003927. Epub 2014/03/15. doi: 10.1371/journal.ppat.1003927. PubMed PMID:  
1338 24626226; PubMed Central PMCID: PMC3953412.
- 1339 277. Kitada K, Akimitsu T, Shigematsu Y, Kondo A, Maihara T, Yokoi N, et al. Accumulation of N-  
1340 acetyl-L-aspartate in the brain of the tremor rat, a mutant exhibiting absence-like seizure and  
1341 spongiform degeneration in the central nervous system. *J Neurochem.* 2000;74(6):2512-9. Epub  
1342 2000/05/23. doi: 10.1046/j.1471-4159.2000.0742512.x. PubMed PMID: 10820213.
- 1343 278. Kuramoto T, Kitada K, Inui T, Sasaki Y, Ito K, Hase T, et al. Attractin/mahogany/zitter plays a  
1344 critical role in myelination of the central nervous system. *Proc Natl Acad Sci U S A.* 2001;98(2):559-  
1345 64. Epub 2001/02/24. doi: 10.1073/pnas.98.2.559. PubMed PMID: 11209055; PubMed Central  
1346 PMCID: PMC14626.

- 1347 279. Kuwamura M, Maeda M, Kuramoto T, Kitada K, Kanehara T, Moriyama M, et al. The myelin  
1348 vacuolation (mv) rat with a null mutation in the attractin gene. *Lab Invest.* 2002;82(10):1279-86.  
1349 Epub 2002/10/16. doi: 10.1097/01.lab.0000032375.70196.26. PubMed PMID: 12379762.
- 1350 280. Tanaka M, Izawa T, Yamate J, Franklin RJ, Kuramoto T, Serikawa T, et al. The VF rat with  
1351 abnormal myelinogenesis has a mutation in *Dopey1*. *Glia.* 2014;62(9):1530-42. Epub 2014/05/28.  
1352 doi: 10.1002/glia.22698. PubMed PMID: 24863653.
- 1353 281. Kuramoto T, Yokoe M, Kunisawa N, Ohashi K, Miyake T, Higuchi Y, et al. Tremor dominant  
1354 Kyoto (Trdk) rats carry a missense mutation in the gene encoding the SK2 subunit of small-  
1355 conductance Ca(2+)-activated K(+) channel. *Brain Res.* 2017;1676:38-45. Epub 2017/09/18. doi:  
1356 10.1016/j.brainres.2017.09.012. PubMed PMID: 28917524.
- 1357 282. Samanas NB, Commers TW, Dennison KL, Harenda QE, Kurz SG, Lachel CM, et al. Genetic  
1358 etiology of renal agenesis: fine mapping of *Renag1* and identification of *Kit* as the candidate  
1359 functional gene. *PLoS One.* 2015;10(2):e0118147. Epub 2015/02/19. doi:  
1360 10.1371/journal.pone.0118147. PubMed PMID: 25693193; PubMed Central PMCID:  
1361 PMCPMC4333340.
- 1362 283. Rost S, Fregin A, Ivaskevicius V, Conzelmann E, Hortnagel K, Pelz HJ, et al. Mutations in  
1363 *VKORC1* cause warfarin resistance and multiple coagulation factor deficiency type 2. *Nature.*  
1364 2004;427(6974):537-41. Epub 2004/02/07. doi: 10.1038/nature02214. PubMed PMID: 14765194.
- 1365 284. Li T, Chang CY, Jin DY, Lin PJ, Khvorova A, Stafford DW. Identification of the gene for vitamin  
1366 K epoxide reductase. *Nature.* 2004;427(6974):541-4. Epub 2004/02/07. doi: 10.1038/nature02254  
1367 nature02254 [pii]. PubMed PMID: 14765195.
- 1368 285. Sasaki N, Hayashizaki Y, Muramatsu M, Matsuda Y, Ando Y, Kuramoto T, et al. The gene  
1369 responsible for LEC hepatitis, located on rat chromosome 16, is the homolog to the human Wilson  
1370 disease gene. *Biochem Biophys Res Commun.* 1994;202(1):512-8. Epub 1994/07/15. doi:  
1371 10.1006/bbrc.1994.1958. PubMed PMID: 8037756.
- 1372 286. Wu J, Forbes JR, Chen HS, Cox DW. The LEC rat has a deletion in the copper transporting  
1373 ATPase gene homologous to the Wilson disease gene. *Nat Genet.* 1994;7(4):541-5. Epub  
1374 1994/08/01. doi: 10.1038/ng0894-541. PubMed PMID: 7951327.
- 1375 287. Plaas M, Seppa K, Reimets R, Jagomae T, Toots M, Koppel T, et al. *Wfs1*- deficient rats  
1376 develop primary symptoms of Wolfram syndrome: insulin-dependent diabetes, optic nerve atrophy  
1377 and medullary degeneration. *Sci Rep.* 2017;7(1):10220. Epub 2017/09/02. doi: 10.1038/s41598-017-  
1378 09392-x. PubMed PMID: 28860598; PubMed Central PMCID: PMCPMC5579261.
- 1379 288. Toots M, Seppa K, Jagomae T, Koppel T, Pallase M, Heinla I, et al. Preventive treatment with  
1380 liraglutide protects against development of glucose intolerance in a rat model of Wolfram syndrome.  
1381 *Sci Rep.* 2018;8(1):10183. Epub 2018/07/07. doi: 10.1038/s41598-018-28314-z. PubMed PMID:  
1382 29976929; PubMed Central PMCID: PMCPMC6033861.
- 1383 289. Nakagawa H, Matsubara S, Kuriyama M, Yoshidome H, Fujiyama J, Yoshida H, et al. Cloning  
1384 of rat lysosomal acid lipase cDNA and identification of the mutation in the rat model of Wolman's  
1385 disease. *J Lipid Res.* 1995;36(10):2212-8. Epub 1995/10/01. PubMed PMID: 8576647.
- 1386 290. Spence JP, Reiter JL, Qiu B, Gu H, Garcia DK, Zhang L, et al. Estrogen-Dependent  
1387 Upregulation of *Adcyap1r1* Expression in Nucleus Accumbens Is Associated With Genetic  
1388 Predisposition of Sex-Specific QTL for Alcohol Consumption on Rat Chromosome 4. *Front Genet.*  
1389 2018;9:513. Epub 2018/12/20. doi: 10.3389/fgene.2018.00513. PubMed PMID: 30564267; PubMed  
1390 Central PMCID: PMCPMC6288178.
- 1391 291. Zhou Z, Karlsson C, Liang T, Xiong W, Kimura M, Tapocik JD, et al. Loss of metabotropic  
1392 glutamate receptor 2 escalates alcohol consumption. *Proc Natl Acad Sci U S A.* 2013;110(42):16963-  
1393 8. Epub 2013/10/02. doi: 10.1073/pnas.1309839110. PubMed PMID: 24082084; PubMed Central  
1394 PMCID: PMCPMC3800985.
- 1395 292. Wood CM, Nicolas CS, Choi SL, Roman E, Nylander I, Fernandez-Teruel A, et al. Prevalence  
1396 and influence of *cys407\** *Grm2* mutation in Hannover-derived Wistar rats: mGlu2 receptor loss links

- 1397 to alcohol intake, risk taking and emotional behaviour. *Neuropharmacology*. 2017;115:128-38. Epub  
1398 2016/03/19. doi: 10.1016/j.neuropharm.2016.03.020. PubMed PMID: 26987983.
- 1399 293. Ding ZM, Ingraham CM, Hauser SR, Lasek AW, Bell RL, McBride WJ. Reduced Levels of mGlu2  
1400 Receptors within the Prelimbic Cortex Are Not Associated with Elevated Glutamate Transmission or  
1401 High Alcohol Drinking. *Alcohol Clin Exp Res*. 2017;41(11):1896-906. Epub 2017/09/01. doi:  
1402 10.1111/acer.13488. PubMed PMID: 28858384; PubMed Central PMCID: PMC5659915.
- 1403 294. Yong W, Spence JP, Eskay R, Fitz SD, Damadzic R, Lai D, et al. Alcohol-preferring rats show  
1404 decreased corticotropin-releasing hormone-2 receptor expression and differences in HPA activation  
1405 compared to alcohol-nonpreferring rats. *Alcohol Clin Exp Res*. 2014;38(5):1275-83. Epub  
1406 2014/03/13. doi: 10.1111/acer.12379. PubMed PMID: 24611993; PubMed Central PMCID:  
1407 PMC54015136.
- 1408 295. Lo CL, Lossie AC, Liang T, Liu Y, Xuei X, Lumeng L, et al. High Resolution Genomic Scans  
1409 Reveal Genetic Architecture Controlling Alcohol Preference in Bidirectionally Selected Rat Model.  
1410 *PLoS Genet*. 2016;12(8):e1006178. Epub 2016/08/05. doi: 10.1371/journal.pgen.1006178
- 1411 PGENETICS-D-16-00489 [pii]. PubMed PMID: 27490364.
- 1412 296. Qiu B, Bell RL, Cao Y, Zhang L, Stewart RB, Graves T, et al. Npy deletion in an alcohol non-  
1413 preferring rat model elicits differential effects on alcohol consumption and body weight. *J Genet  
1414 Genomics*. 2016;43(7):421-30. Epub 2016/07/28. doi: 10.1016/j.jgg.2016.04.010. PubMed PMID:  
1415 27461754; PubMed Central PMCID: PMC5055068.
- 1416 297. Izumi R, Kusakabe T, Noguchi M, Iwakura H, Tanaka T, Miyazawa T, et al. CRISPR/Cas9-  
1417 mediated Angptl8 knockout suppresses plasma triglyceride concentrations and adiposity in rats. *J  
1418 Lipid Res*. 2018;59(9):1575-85. Epub 2018/07/26. doi: 10.1194/jlr.M082099. PubMed PMID:  
1419 30042156; PubMed Central PMCID: PMC6121927.
- 1420 298. Zhou LB, Zheng YM, Liao WJ, Song LJ, Meng X, Gong X, et al. MUC1 deficiency promotes  
1421 nasal epithelial barrier dysfunction in subjects with allergic rhinitis. *J Allergy Clin Immunol*.  
1422 2019;144(6):1716-9 e5. Epub 2019/08/20. doi: 10.1016/j.jaci.2019.07.042. PubMed PMID:  
1423 31425778.
- 1424 299. Wang M, Sips P, Khin E, Rotival M, Sun X, Ahmed R, et al. Wars2 is a determinant of  
1425 angiogenesis. *Nat Commun*. 2016;7:12061. Epub 2016/07/09. doi: 10.1038/ncomms12061. PubMed  
1426 PMID: 27389904; PubMed Central PMCID: PMC54941120.
- 1427 300. Falak S, Schafer S, Baud A, Hummel O, Schulz H, Gauguier D, et al. Protease inhibitor 15, a  
1428 candidate gene for abdominal aortic internal elastic lamina ruptures in the rat. *Physiol Genomics*.  
1429 2014;46(12):418-28. Epub 2014/05/03. doi: 10.1152/physiolgenomics.00004.2014. PubMed PMID:  
1430 24790086; PubMed Central PMCID: PMC4060037.
- 1431 301. Lorentzen JC, Flornes L, Eklow C, Backdahl L, Ribbhammar U, Guo JP, et al. Association of  
1432 arthritis with a gene complex encoding C-type lectin-like receptors. *Arthritis Rheum*.  
1433 2007;56(8):2620-32. Epub 2007/08/01. doi: 10.1002/art.22813. PubMed PMID: 17665455.
- 1434 302. Rintisch C, Kelkka T, Norin U, Lorentzen JC, Olofsson P, Holmdahl R. Finemapping of the  
1435 arthritis QTL Pia7 reveals co-localization with Oia2 and the APLEC locus. *Genes Immun*.  
1436 2010;11(3):239-45. Epub 2010/03/05. doi: 10.1038/gene.2010.2. PubMed PMID: 20200546.
- 1437 303. Backdahl L, Ekman D, Jagodic M, Olsson T, Holmdahl R. Identification of candidate risk gene  
1438 variations by whole-genome sequence analysis of four rat strains commonly used in inflammation  
1439 research. *BMC Genomics*. 2014;15:391. Epub 2014/06/03. doi: 10.1186/1471-2164-15-391. PubMed  
1440 PMID: 24885425; PubMed Central PMCID: PMC4041999.
- 1441 304. Swanberg M, Lidman O, Padyukov L, Eriksson P, Akesson E, Jagodic M, et al. MHC2TA is  
1442 associated with differential MHC molecule expression and susceptibility to rheumatoid arthritis,  
1443 multiple sclerosis and myocardial infarction. *Nat Genet*. 2005;37(5):486-94. Epub 2005/04/12. doi:  
1444 10.1038/ng1544. PubMed PMID: 15821736.
- 1445 305. Li H, Guan SB, Lu Y, Wang F, Liu YH, Liu QY. Genetic deletion of GIT2 prolongs functional  
1446 recovery and suppresses chondrocyte differentiation in rats with rheumatoid arthritis. *J Cell*

- 1447 Biochem. 2018;119(2):1538-47. Epub 2017/08/05. doi: 10.1002/jcb.26313. PubMed PMID:  
1448 28777475.
- 1449 306. Laragione T, Brenner M, Lahiri A, Gao E, Harris C, Gulko PS. Huntingtin-interacting protein 1  
1450 (HIP1) regulates arthritis severity and synovial fibroblast invasiveness by altering PDGFR and Rac1  
1451 signalling. *Ann Rheum Dis.* 2018;77(11):1627-35. Epub 2018/07/28. doi: annrheumdis-2018-213498  
1452 [pii]  
10.1136/annrheumdis-2018-213498. PubMed PMID: 30049830.
- 1453 307. Hultqvist M, Sareila O, Vilhardt F, Norin U, Olsson LM, Olofsson P, et al. Positioning of a  
1454 polymorphic quantitative trait nucleotide in the Ncf1 gene controlling oxidative burst response and  
1455 arthritis severity in rats. *Antioxid Redox Signal.* 2011;14(12):2373-83. Epub 2011/02/01. doi:  
1456 10.1089/ars.2010.3440. PubMed PMID: 21275845.
- 1457 308. Olsson LM, Lindqvist AK, Kallberg H, Padyukov L, Burkhardt H, Alfredsson L, et al. A case-  
1458 control study of rheumatoid arthritis identifies an associated single nucleotide polymorphism in the  
1459 NCF4 gene, supporting a role for the NADPH-oxidase complex in autoimmunity. *Arthritis Res Ther.*  
1460 2007;9(5):R98. Epub 2007/09/28. doi: 10.1186/ar2299. PubMed PMID: 17897462; PubMed Central  
1461 PMCID: PMCPMC2212587.
- 1462 309. Yau AC, Tuncel J, Haag S, Norin U, Houtman M, Padyukov L, et al. Conserved 33-kb haplotype  
1463 in the MHC class III region regulates chronic arthritis. *Proc Natl Acad Sci U S A.* 2016;113(26):E3716-  
1464 24. Epub 2016/06/16. doi: 10.1073/pnas.1600567113. PubMed PMID: 27303036; PubMed Central  
1465 PMCID: PMCPMC4932949.
- 1466 310. Yau ACY, Tuncel J, Holmdahl R. The Major Histocompatibility Complex Class III Haplotype  
1467 Ltab-Ncr3 Regulates Adjuvant-Induced but Not Antigen-Induced Autoimmunity. *Am J Pathol.*  
1468 2017;187(5):987-98. Epub 2017/03/21. doi: 10.1016/j.ajpath.2016.12.022. PubMed PMID:  
1469 28315676.
- 1470 311. Haag S, Tuncel J, Thordardottir S, Mason DE, Yau AC, Dobritzsch D, et al. Positional  
1471 identification of RT1-B (HLA-DQ) as susceptibility locus for autoimmune arthritis. *J Immunol.*  
1472 2015;194(6):2539-50. Epub 2015/02/13. doi: 10.4049/jimmunol.1402238. PubMed PMID: 25672758.
- 1473 312. Guerreiro-Cacais AO, Norin U, Gyllenberg A, Berglund R, Beyeen AD, Rheumatoid Arthritis  
1474 Consortium I, et al. VAV1 regulates experimental autoimmune arthritis and is associated with anti-  
1475 CCP negative rheumatoid arthritis. *Genes Immun.* 2017;18(1):48-56. Epub 2017/01/06. doi:  
1476 10.1038/gene.2016.49. PubMed PMID: 28053322.
- 1477 313. Reese RM, Dourado M, Anderson K, Warming S, Stark KL, Balestrini A, et al. Behavioral  
1478 characterization of a CRISPR-generated TRPA1 knockout rat in models of pain, itch, and asthma. *Sci*  
1479 *Rep.* 2020;10(1):979. Epub 2020/01/24. doi: 10.1038/s41598-020-57936-5. PubMed PMID:  
1480 31969645; PubMed Central PMCID: PMCPMC6976688.
- 1481 314. Xu Y, Zhao XM, Liu J, Wang YY, Xiong LL, He XY, et al. Complexin I knockout rats exhibit a  
1482 complex neurobehavioral phenotype including profound ataxia and marked deficits in lifespan.  
1483 *Pflugers Arch.* 2019. Epub 2019/12/26. doi: 10.1007/s00424-019-02337-5. PubMed PMID:  
1484 31875236.
- 1485 315. Serikawa T, Kunisawa N, Shimizu S, Kato M, Alves Iha H, Kinboshi M, et al. Increased seizure  
1486 sensitivity, emotional defects and cognitive impairment in PHD finger protein 24 (Phf24)-null rats.  
1487 *Behav Brain Res.* 2019;369:111922. Epub 2019/05/01. doi: 10.1016/j.bbr.2019.111922. PubMed  
1488 PMID: 31039378.
- 1489 316. Regan SL, Hufgard JR, Pitzer EM, Sugimoto C, Hu YC, Williams MT, et al. Knockout of  
1490 latrophilin-3 in Sprague-Dawley rats causes hyperactivity, hyper-reactivity, under-response to  
1491 amphetamine, and disrupted dopamine markers. *Neurobiol Dis.* 2019;130:104494. Epub  
1492 2019/06/10. doi: 10.1016/j.nbd.2019.104494. PubMed PMID: 31176715; PubMed Central PMCID:  
1493 PMCPMC6689430.
- 1494 317. Peeters DGA, de Boer SF, Terneusen A, Newman-Tancredi A, Varney MA, Verkes RJ, et al.  
1495 Enhanced aggressive phenotype of Tph2 knockout rats is associated with diminished 5-HT1A  
1496



- 1497 receptor sensitivity. *Neuropharmacology*. 2019;153:134-41. Epub 2019/05/13. doi:  
1498 10.1016/j.neuropharm.2019.05.004. PubMed PMID: 31078489.
- 1499 318. Schroeder M, Weller A. Anxiety-like behavior and locomotion in CCK1 knockout rats as a  
1500 function of strain, sex and early maternal environment. *Behav Brain Res*. 2010;211(2):198-207. Epub  
1501 2010/03/30. doi: 10.1016/j.bbr.2010.03.038. PubMed PMID: 20347877.
- 1502 319. Nivard MG, Mbarek H, Hottenga JJ, Smit JH, Jansen R, Penninx BW, et al. Further  
1503 confirmation of the association between anxiety and CTNND2: replication in humans. *Genes Brain  
1504 Behav*. 2014;13(2):195-201. Epub 2013/11/22. doi: 10.1111/gbb.12095. PubMed PMID: 24256404.
- 1505 320. Baud A, Flint J, Fernandez-Teruel A, Consortium TRGSM. Identification of genetic variants  
1506 underlying anxiety and multiple sclerosis in heterogeneous stock rats. *World J Neurosci*. 2014;4:216-  
1507 24.
- 1508 321. Olivier JD, Van Der Hart MG, Van Swelm RP, Dederen PJ, Homberg JR, Cremers T, et al. A  
1509 study in male and female 5-HT transporter knockout rats: an animal model for anxiety and  
1510 depression disorders. *Neuroscience*. 2008;152(3):573-84. Epub 2008/02/26. doi:  
1511 10.1016/j.neuroscience.2007.12.032. PubMed PMID: 18295409.
- 1512 322. van der Doelen RHA, Robroch B, Arnoldussen IA, Schulpen M, Homberg JR, Kozicz T.  
1513 Serotonin and urocortin 1 in the dorsal raphe and Edinger-Westphal nuclei after early life stress in  
1514 serotonin transporter knockout rats. *Neuroscience*. 2017;340:345-58. Epub 2016/11/09. doi:  
1515 10.1016/j.neuroscience.2016.10.072. PubMed PMID: 27826101.
- 1516 323. Rutten K, De Vry J, Bruckmann W, Tzschentke TM. Pharmacological blockade or genetic  
1517 knockout of the NOP receptor potentiates the rewarding effect of morphine in rats. *Drug Alcohol  
1518 Depend*. 2011;114(2-3):253-6. Epub 2010/11/26. doi: 10.1016/j.drugalcdep.2010.10.004. PubMed  
1519 PMID: 21095077.
- 1520 324. Rizzi A, Molinari S, Marti M, Marzola G, Calo G. Nociceptin/orphanin FQ receptor knockout  
1521 rats: in vitro and in vivo studies. *Neuropharmacology*. 2011;60(4):572-9. Epub 2010/12/28. doi:  
1522 10.1016/j.neuropharm.2010.12.010. PubMed PMID: 21184763.
- 1523 325. Esclassan F, Francois J, Phillips KG, Loomis S, Gilmour G. Phenotypic characterization of  
1524 nonsocial behavioral impairment in neurexin 1alpha knockout rats. *Behav Neurosci*. 2015;129(1):74-  
1525 85. Epub 2014/11/25. doi: 10.1037/bne0000024. PubMed PMID: 25420124.
- 1526 326. Homberg JR, Olivier JD, VandenBroeke M, Youn J, Ellenbroek AK, Karel P, et al. The role of  
1527 the dopamine D1 receptor in social cognition: studies using a novel genetic rat model. *Dis Model  
1528 Mech*. 2016;9(10):1147-58. Epub 2016/08/03. doi: 10.1242/dmm.024752. PubMed PMID: 27483345;  
1529 PubMed Central PMCID: PMC5087833.
- 1530 327. Leo D, Sukhanov I, Gainetdinov RR. Novel translational rat models of dopamine transporter  
1531 deficiency. *Neural Regen Res*. 2018;13(12):2091-3. Epub 2018/10/17. doi:  
1532 [10.4103/1673-5374.241453](https://doi.org/10.4103/1673-5374.241453) [pii]
- 1533 10.4103/1673-5374.241453. PubMed PMID: 30323131.
- 1534 328. Vengeliene V, Bernalov A, Rossmanith M, Horschitz S, Berger S, Relo AL, et al. Towards trans-  
1535 diagnostic mechanisms in psychiatry: neurobehavioral profile of rats with a loss-of-function point  
1536 mutation in the dopamine transporter gene. *Dis Model Mech*. 2017;10(4):451-61. Epub 2017/02/09.  
1537 doi: 10.1242/dmm.027623. PubMed PMID: 28167616; PubMed Central PMCID: PMC5399565.
- 1538 329. Rasmus KC, O'Neill CE, Bachtell RK, Cooper DC. Cocaine self-administration in rats lacking a  
1539 functional trpc4 gene. *F1000Res*. 2013;2:110. Epub 2014/02/21. doi: 10.12688/f1000research.2-  
1540 110.v1. PubMed PMID: 24555056; PubMed Central PMCID: PMC3901450.
- 1541 330. Scheimann JR, Moloney RD, Mahbod P, Morano RL, Fitzgerald M, Hoskins O, et al.  
1542 Conditional deletion of glucocorticoid receptors in rat brain results in sex-specific deficits in fear and  
1543 coping behaviors. *Elife*. 2019;8. Epub 2019/07/23. doi: 10.7554/eLife.44672. PubMed PMID:  
1544 31329100; PubMed Central PMCID: PMC6645713.
- 1545 331. Barnett BR, Torres-Velazquez M, Yi SY, Rowley PA, Sawin EA, Rubinstein CD, et al. Sex-  
1546 specific deficits in neurite density and white matter integrity are associated with targeted disruption

- 1547 of exon 2 of the *Disc1* gene in the rat. *Transl Psychiatry*. 2019;9(1):82. Epub 2019/02/13. doi:  
1548 10.1038/s41398-019-0429-2. PubMed PMID: 30745562; PubMed Central PMCID: PMC6370885.  
1549 332. Kisko TM, Braun MD, Michels S, Witt SH, Rietschel M, Culmsee C, et al. *Cacna1c*  
1550 haploinsufficiency leads to pro-social 50-kHz ultrasonic communication deficits in rats. *Dis Model*  
1551 *Mech*. 2018;11(6). Epub 2018/05/10. doi: 10.1242/dmm.034116. PubMed PMID: 29739816;  
1552 PubMed Central PMCID: PMC6031367.  
1553 333. Braun MD, Kisko TM, Vecchia DD, Andreatini R, Schwarting RKW, Wöhr M. Sex-specific  
1554 effects of *Cacna1c* haploinsufficiency on object recognition, spatial memory, and reversal learning  
1555 capabilities in rats. *Neurobiol Learn Mem*. 2018;155:543-55. Epub 2018/05/26. doi:  
1556 10.1016/j.nlm.2018.05.012. PubMed PMID: 29800644.  
1557 334. Golub Y, Schildbach EM, Touma C, Kratz O, Moll GH, von Horsten S, et al. Role of  
1558 hypothalamus-pituitary-adrenal axis modulation in the stress-resilient phenotype of *DPP4*-deficient  
1559 rats. *Behav Brain Res*. 2019;356:243-9. Epub 2018/09/04. doi: 10.1016/j.bbr.2018.08.029. PubMed  
1560 PMID: 30176267.  
1561 335. Taylor SB, Taylor AR, Markham JA, Geurts AM, Kanaskie BZ, Koenig JI. Disruption of the  
1562 neuregulin 1 gene in the rat alters HPA axis activity and behavioral responses to environmental  
1563 stimuli. *Physiol Behav*. 2011;104(2):205-14. Epub 2010/11/26. doi: 10.1016/j.physbeh.2010.11.015.  
1564 PubMed PMID: 21092742; PubMed Central PMCID: PMC3081908.  
1565 336. Ferdaus MZ, Xiao B, Ohara H, Nemoto K, Harada Y, Saar K, et al. Identification of *Stim1* as a  
1566 candidate gene for exaggerated sympathetic response to stress in the stroke-prone spontaneously  
1567 hypertensive rat. *PLoS One*. 2014;9(4):e95091. Epub 2014/04/17. doi:  
1568 10.1371/journal.pone.0095091. PubMed PMID: 24736434; PubMed Central PMCID:  
1569 PMC3988177.  
1570 337. Ohara H, Nabika T. A nonsense mutation of *Stim1* identified in stroke-prone spontaneously  
1571 hypertensive rats decreased the store-operated calcium entry in astrocytes. *Biochem Biophys Res*  
1572 *Commun*. 2016;476(4):406-11. Epub 2016/05/31. doi: 10.1016/j.bbrc.2016.05.134. PubMed PMID:  
1573 27237974.  
1574 338. Deruyver Y, Weyne E, Dewulf K, Rietjens R, Pinto S, Van Ranst N, et al. Intravesical Activation  
1575 of the Cation Channel TRPV4 Improves Bladder Function in a Rat Model for Detrusor Underactivity.  
1576 *Eur Urol*. 2018;74(3):336-45. Epub 2018/06/08. doi: 10.1016/j.eururo.2018.05.020. PubMed PMID:  
1577 29875065.  
1578 339. Gopalakrishnan K, Kumarasamy S, Abdul-Majeed S, Kalinoski AL, Morgan EE, Gohara AF, et  
1579 al. Targeted disruption of *Adamts16* gene in a rat genetic model of hypertension. *Proc Natl Acad Sci*  
1580 *U S A*. 2012. Epub 2012/11/28. doi: 1211290109 [pii]  
1581 10.1073/pnas.1211290109. PubMed PMID: 23185005.  
1582 340. Joe B, Saad Y, Dhindaw S, Lee NH, Frank BC, Achinike OH, et al. Positional identification of  
1583 variants of *Adamts16* linked to inherited hypertension. *Hum Mol Genet*. 2009;18(15):2825-38. Epub  
1584 2009/05/09. doi: 10.1093/hmg/ddp218. PubMed PMID: 19423552; PubMed Central PMCID:  
1585 PMC2706685.  
1586 341. Citterio L, Lanzani C, Manunta P, Bianchi G. Genetics of primary hypertension: the clinical  
1587 impact of adducin polymorphisms. *Biochim Biophys Acta*. 2010;1802(12):1285-98. Epub 2010/04/13.  
1588 doi: 10.1016/j.bbdis.2010.03.014. PubMed PMID: 20382219.  
1589 342. Tripodi G, Florio M, Ferrandi M, Modica R, Zimdahl H, Hubner N, et al. Effect of *Add1* gene  
1590 transfer on blood pressure in reciprocal congenic strains of Milan rats. *Biochem Biophys Res*  
1591 *Commun*. 2004;324(2):562-8. Epub 2004/10/12. doi: 10.1016/j.bbrc.2004.09.079. PubMed PMID:  
1592 15474463.  
1593 343. Woon PY, Kaisaki PJ, Braganca J, Bihoreau MT, Levy JC, Farrall M, et al. Aryl hydrocarbon  
1594 receptor nuclear translocator-like (*BMAL1*) is associated with susceptibility to hypertension and type  
1595 2 diabetes. *Proc Natl Acad Sci U S A*. 2007;104(36):14412-7. Epub 2007/08/31. doi:  
1596 10.1073/pnas.0703247104. PubMed PMID: 17728404; PubMed Central PMCID: PMC1958818.

- 1597 344. Rudemiller N, Lund H, Jacob HJ, Geurts AM, Mattson DL, PhysGen Knockout P. CD247  
1598 modulates blood pressure by altering T-lymphocyte infiltration in the kidney. *Hypertension*.  
1599 2014;63(3):559-64. Epub 2013/12/18. doi: 10.1161/HYPERTENSIONAHA.113.02191. PubMed PMID:  
1600 24343121; PubMed Central PMCID: PMC3945169.
- 1601 345. Ehret GB, O'Connor AA, Weder A, Cooper RS, Chakravarti A. Follow-up of a major linkage  
1602 peak on chromosome 1 reveals suggestive QTLs associated with essential hypertension: GenNet  
1603 study. *Eur J Hum Genet*. 2009;17(12):1650-7. Epub 2009/06/19. doi: 10.1038/ejhg.2009.94. PubMed  
1604 PMID: 19536175; PubMed Central PMCID: PMC2783544.
- 1605 346. Deng AY, deBlois D, Laporte SA, Gelinis D, Tardif JC, Thorin E, et al. Novel Pathogenesis of  
1606 Hypertension and Diastolic Dysfunction Caused by M3R (Muscarinic Cholinergic 3 Receptor)  
1607 Signaling. *Hypertension*. 2018;72(3):755-64. Epub 2018/10/26. doi:  
1608 10.1161/HYPERTENSIONAHA.118.11385. PubMed PMID: 30354759.
- 1609 347. Prisco SZ, Prokop JW, Sarkis AB, Yeo NC, Hoffman MJ, Hansen CC, et al. Refined mapping of a  
1610 hypertension susceptibility locus on rat chromosome 12. *Hypertension*. 2014;64(4):883-90. Epub  
1611 2014/07/09. doi: 10.1161/HYPERTENSIONAHA.114.03550. PubMed PMID: 25001272; PubMed  
1612 Central PMCID: PMC4162822.
- 1613 348. Garrett MR, Rapp JP. Defining the blood pressure QTL on chromosome 7 in Dahl rats by a  
1614 177-kb congenic segment containing Cyp11b1. *Mamm Genome*. 2003;14(4):268-73. Epub  
1615 2003/04/12. doi: 10.1007/s00335-002-2245-9. PubMed PMID: 12682779.
- 1616 349. Low TY, van Heesch S, van den Toorn H, Giansanti P, Cristobal A, Toonen P, et al.  
1617 Quantitative and qualitative proteome characteristics extracted from in-depth integrated genomics  
1618 and proteomics analysis. *Cell Rep*. 2013;5(5):1469-78. Epub 2013/12/03. doi: S2211-1247(13)00640-  
1619 2 [pii]  
10.1016/j.celrep.2013.10.041. PubMed PMID: 24290761.
- 1620 350. Seda O, Liska F, Pravenec M, Vernerova Z, Kazdova L, Krenova D, et al. Connexin 50 mutation  
1621 lowers blood pressure in spontaneously hypertensive rat. *Physiol Res*. 2017;66(1):15-28. Epub  
1622 2016/10/27. doi: 10.33549/physiolres.933432. PubMed PMID: 27782748.
- 1623 351. Waghulde H, Cheng X, Galla S, Mell B, Cai J, Pruett-Miller SM, et al. Attenuation of  
1624 Microbial Dysbiosis and Hypertension in a CRISPR/Cas9 Gene Ablation Rat Model of GPER1.  
1625 *Hypertension*. 2018;72(5):1125-32. Epub 2018/10/26. doi: 10.1161/HYPERTENSIONAHA.118.11175.  
1626 PubMed PMID: 30354811; PubMed Central PMCID: PMC6208154.
- 1627 352. Mullins LJ, Kenyon CJ, Bailey MA, Conway BR, Diaz ME, Mullins JJ. Mineralocorticoid Excess  
1628 or Glucocorticoid Insufficiency: Renal and Metabolic Phenotypes in a Rat Hsd11b2 Knockout Model.  
1629 *Hypertension*. 2015;66(3):667-73. Epub 2015/06/17. doi: 10.1161/HYPERTENSIONAHA.115.05262.  
1630 PubMed PMID: 26077568; PubMed Central PMCID: PMC4847935.
- 1631 353. Seitz BM, Demireva EY, Xie H, Fink GD, Krieger-Burke T, Burke WM, et al. 5-HT does not  
1632 lower blood pressure in the 5-HT7 knockout rat. *Physiol Genomics*. 2019;51(7):302-10. Epub  
1633 2019/05/28. doi: 10.1152/physiolgenomics.00031.2019. PubMed PMID: 31125292; PubMed Central  
1634 PMCID: PMC6689729.
- 1635 354. Zhou X, Zhang Z, Shin MK, Horwitz SB, Levorse JM, Zhu L, et al. Heterozygous disruption of  
1636 renal outer medullary potassium channel in rats is associated with reduced blood pressure.  
1637 *Hypertension*. 2013;62(2):288-94. Epub 2013/06/12. doi: 10.1161/HYPERTENSIONAHA.111.01051.  
1638 PubMed PMID: 23753405.
- 1639 355. Palygin O, Levchenko V, Ilatovskaya DV, Pavlov TS, Pochynyuk OM, Jacob HJ, et al. Essential  
1640 role of Kir5.1 channels in renal salt handling and blood pressure control. *JCI Insight*. 2017;2(18). Epub  
1641 2017/09/22. doi: 10.1172/jci.insight.92331. PubMed PMID: 28931751; PubMed Central PMCID:  
1642 PMC5621918.
- 1643 356. Feng D, Yang C, Geurts AM, Kurth T, Liang M, Lazar J, et al. Increased expression of NAD(P)H  
1644 oxidase subunit p67(phox) in the renal medulla contributes to excess oxidative stress and salt-  
1645 sensitive hypertension. *Cell Metab*. 2012;15(2):201-8. Epub 2012/02/14. doi:  
1646 10.1016/j.cmet.2012.01.003. PubMed PMID: 22326221; PubMed Central PMCID: PMC3280886.

- 1648 357. Zheleznova NN, Yang C, Cowley AW, Jr. Role of Nox4 and p67phox subunit of Nox2 in ROS  
1649 production in response to increased tubular flow in the mTAL of Dahl salt-sensitive rats. *Am J Physiol*  
1650 *Renal Physiol.* 2016;311(2):F450-8. Epub 2016/06/10. doi: 10.1152/ajprenal.00187.2016. PubMed  
1651 PMID: 27279484; PubMed Central PMCID: PMC5243222.
- 1652 358. Cowley AW, Jr., Yang C, Zheleznova NN, Staruschenko A, Kurth T, Rein L, et al. Evidence of  
1653 the Importance of Nox4 in Production of Hypertension in Dahl Salt-Sensitive Rats. *Hypertension.*  
1654 2016;67(2):440-50. Epub 2015/12/09. doi: 10.1161/HYPERTENSIONAHA.115.06280. PubMed PMID:  
1655 26644237; PubMed Central PMCID: PMC4713301.
- 1656 359. Holditch SJ, Schreiber CA, Nini R, Tonne JM, Peng KW, Geurts A, et al. B-Type Natriuretic  
1657 Peptide Deletion Leads to Progressive Hypertension, Associated Organ Damage, and Reduced  
1658 Survival: Novel Model for Human Hypertension. *Hypertension.* 2015;66(1):199-210. Epub  
1659 2015/06/13. doi: 10.1161/HYPERTENSIONAHA.115.05610. PubMed PMID: 26063669; PubMed  
1660 Central PMCID: PMC4467451.
- 1661 360. Kumarasamy S, Waghulde H, Gopalakrishnan K, Mell B, Morgan E, Joe B. Mutation within the  
1662 hinge region of the transcription factor Nr2f2 attenuates salt-sensitive hypertension. *Nat Commun.*  
1663 2015;6:6252. Epub 2015/02/18. doi: 10.1038/ncomms7252. PubMed PMID: 25687237; PubMed  
1664 Central PMCID: PMC4486351.
- 1665 361. Cowley AW, Jr., Yang C, Kumar V, Lazar J, Jacob H, Geurts AM, et al. Pappa2 is linked to salt-  
1666 sensitive hypertension in Dahl S rats. *Physiol Genomics.* 2016;48(1):62-72. Epub 2015/11/05. doi:  
1667 10.1152/physiolgenomics.00097.2015. PubMed PMID: 26534937; PubMed Central PMCID:  
1668 PMC4757026.
- 1669 362. Endres BT, Priestley JR, Palygin O, Flister MJ, Hoffman MJ, Weinberg BD, et al. Mutation of  
1670 *Plekha7* attenuates salt-sensitive hypertension in the rat. *Proc Natl Acad Sci U S A.*  
1671 2014;111(35):12817-22. Epub 2014/08/20. doi: 10.1073/pnas.1410745111. PubMed PMID:  
1672 25136115; PubMed Central PMCID: PMC4156702.
- 1673 363. Mahal Z, Fujikawa K, Matsuo H, Zahid HM, Koike M, Misumi M, et al. Effects of the *Prdx2*  
1674 depletion on blood pressure and life span in spontaneously hypertensive rats. *Hypertens Res.*  
1675 2019;42(5):610-7. Epub 2019/01/19. doi: 10.1038/s41440-019-0207-9. PubMed PMID: 30655626.
- 1676 364. Mattson DL, Lund H, Guo C, Rudemiller N, Geurts AM, Jacob H. Genetic mutation of  
1677 recombination activating gene 1 in Dahl salt-sensitive rats attenuates hypertension and renal  
1678 damage. *Am J Physiol Regul Integr Comp Physiol.* 2013;304(6):R407-14. Epub 2013/02/01. doi:  
1679 10.1152/ajpregu.00304.2012. PubMed PMID: 23364523; PubMed Central PMCID:  
1680 PMC3602820.
- 1681 365. Watts SW, Darios ES, Mullick AE, Garver H, Saunders TL, Hughes ED, et al. The chemerin  
1682 knockout rat reveals chemerin dependence in female, but not male, experimental hypertension.  
1683 *FASEB J.* 2018:fj201800479. Epub 2018/06/16. doi: 10.1096/fj.201800479. PubMed PMID:  
1684 29906243; PubMed Central PMCID: PMC6219827.
- 1685 366. Moreno C, Hoffman M, Stodola TJ, Didier DN, Lazar J, Geurts AM, et al. Creation and  
1686 characterization of a renin knockout rat. *Hypertension.* 2011;57(3):614-9. Epub 2011/01/19. doi:  
1687 10.1161/HYPERTENSIONAHA.110.163840. PubMed PMID: 21242461; PubMed Central PMCID:  
1688 PMC3513323.
- 1689 367. Raff H, Gehrand A, Bruder ED, Hoffman MJ, Engeland WC, Moreno C. Renin knockout rat:  
1690 control of adrenal aldosterone and corticosterone synthesis in vitro and adrenal gene expression.  
1691 *Am J Physiol Regul Integr Comp Physiol.* 2015;308(1):R73-7. Epub 2014/11/15. doi:  
1692 10.1152/ajpregu.00440.2014. PubMed PMID: 25394830; PubMed Central PMCID:  
1693 PMC4281677.
- 1694 368. Kumarasamy S, Waghulde H, Cheng X, Haller ST, Mell B, Abhijith B, et al. Targeted disruption  
1695 of regulated endocrine-specific protein ( *Resp18*) in Dahl SS/Mcw rats aggravates salt-induced  
1696 hypertension and renal injury. *Physiol Genomics.* 2018;50(5):369-75. Epub 2018/03/24. doi:  
1697 10.1152/physiolgenomics.00008.2018. PubMed PMID: 29570433; PubMed Central PMCID:  
1698 PMC6008117.

- 1699 369. Rudemiller NP, Lund H, Priestley JR, Endres BT, Prokop JW, Jacob HJ, et al. Mutation of  
1700 SH2B3 (LNK), a genome-wide association study candidate for hypertension, attenuates Dahl salt-  
1701 sensitive hypertension via inflammatory modulation. *Hypertension*. 2015;65(5):1111-7. Epub  
1702 2015/03/18. doi: 10.1161/HYPERTENSIONAHA.114.04736. PubMed PMID: 25776069; PubMed  
1703 Central PMCID: PMC4412596.
- 1704 370. Ely D, Milsted A, Dunphy G, Boehme S, Dunmire J, Hart M, et al. Delivery of sry1, but not  
1705 sry2, to the kidney increases blood pressure and sns indices in normotensive wky rats. *BMC Physiol*.  
1706 2009;9:10. Epub 2009/06/09. doi: 10.1186/1472-6793-9-10. PubMed PMID: 19500370; PubMed  
1707 Central PMCID: PMC4412596.
- 1708 371. Liska F, Mancini M, Krupkova M, Chylikova B, Krenova D, Seda O, et al. Plzf as a candidate  
1709 gene predisposing the spontaneously hypertensive rat to hypertension, left ventricular hypertrophy,  
1710 and interstitial fibrosis. *Am J Hypertens*. 2014;27(1):99-106. Epub 2013/08/27. doi: hpt156 [pii]  
1711 10.1093/ajh/hpt156. PubMed PMID: 23975223.
- 1712 372. Liska F, Landa V, Zidek V, Mlejnek P, Silhavy J, Simakova M, et al. Downregulation of Plzf  
1713 Gene Ameliorates Metabolic and Cardiac Traits in the Spontaneously Hypertensive Rat.  
1714 *Hypertension*. 2017;69(6):1084-91. Epub 2017/04/12. doi: HYPERTENSIONAHA.116.08798 [pii]  
1715 10.1161/HYPERTENSIONAHA.116.08798. PubMed PMID: 28396530.
- 1716 373. Zicha J, Dobesova Z, Zidek V, Silhavy J, Simakova M, Mlejnek P, et al. Pharmacogenetic  
1717 analysis of captopril effects on blood pressure: possible role of the Ednrb (endothelin receptor type  
1718 B) candidate gene. *Physiol Res*. 2014;63(2):263-5. Epub 2014/05/02. doi: 932732 [pii]. PubMed  
1719 PMID: 24779608.
- 1720 374. Wang D, Li H, Weir EK, Xu Y, Xu D, Chen Y. Dimethylarginine dimethylaminohydrolase 1  
1721 deficiency aggravates monocrotaline-induced pulmonary oxidative stress, pulmonary arterial  
1722 hypertension and right heart failure in rats. *Int J Cardiol*. 2019;295:14-20. Epub 2019/08/14. doi:  
1723 10.1016/j.ijcard.2019.07.078. PubMed PMID: 31402164.
- 1724 375. Lambert M, Capuano V, Boet A, Tesson L, Bertero T, Nakhleh MK, et al. Characterization of  
1725 Kcnk3-Mutated Rat, a Novel Model of Pulmonary Hypertension. *Circ Res*. 2019. Epub 2019/07/28.  
1726 doi: 10.1161/CIRCRESAHA.119.314793. PubMed PMID: 31347976.
- 1727 376. Gao W, Shao R, Zhang X, Liu D, Liu Y, Fa X. Up-regulation of caveolin-1 by DJ-1 attenuates rat  
1728 pulmonary arterial hypertension by inhibiting TGFbeta/Smad signaling pathway. *Exp Cell Res*.  
1729 2017;361(1):192-8. Epub 2017/10/27. doi: 10.1016/j.yexcr.2017.10.019. PubMed PMID: 29069575.
- 1730 377. Zhao L, Oliver E, Maratou K, Atanur SS, Dubois OD, Cotroneo E, et al. The zinc transporter  
1731 ZIP12 regulates the pulmonary vascular response to chronic hypoxia. *Nature*. 2015;524(7565):356-  
1732 60. Epub 2015/08/11. doi: 10.1038/nature14620. PubMed PMID: 26258299; PubMed Central  
1733 PMCID: PMC4412596.
- 1734 378. Xu D, Guo H, Xu X, Lu Z, Fassett J, Hu X, et al. Exacerbated pulmonary arterial hypertension  
1735 and right ventricular hypertrophy in animals with loss of function of extracellular superoxide  
1736 dismutase. *Hypertension*. 2011;58(2):303-9. Epub 2011/07/07. doi:  
1737 10.1161/HYPERTENSIONAHA.110.166819. PubMed PMID: 21730301; PubMed Central PMCID:  
1738 PMC4412596.
- 1739 379. Alzoubi A, Almalouf P, Toba M, O'Neill K, Qian X, Francis M, et al. TRPC4 inactivation confers  
1740 a survival benefit in severe pulmonary arterial hypertension. *Am J Pathol*. 2013;183(6):1779-88.  
1741 Epub 2013/10/12. doi: 10.1016/j.ajpath.2013.08.016. PubMed PMID: 24113457; PubMed Central  
1742 PMCID: PMC4412596.
- 1743 380. Nomoto S, Ohta M, Kanai S, Yoshida Y, Takiguchi S, Funakoshi A, et al. Absence of the  
1744 cholecystikinin-A receptor deteriorates homeostasis of body temperature in response to changes in  
1745 ambient temperature. *Am J Physiol Regul Integr Comp Physiol*. 2004;287(3):R556-61. Epub  
1746 2004/06/05. doi: 10.1152/ajpregu.00542.2003. PubMed PMID: 15178543.

- 1747 381. Takiguchi S, Takata Y, Funakoshi A, Miyasaka K, Kataoka K, Fujimura Y, et al. Disrupted  
1748 cholecystikinin type-A receptor (CCKAR) gene in OLETF rats. *Gene*. 1997;197(1-2):169-75. Epub  
1749 1997/10/23. doi: 10.1016/s0378-1119(97)00259-x. PubMed PMID: 9332364.
- 1750 382. Gu H, Cao Y, Qiu B, Zhou Z, Deng R, Chen Z, et al. Establishment and phenotypic analysis of  
1751 an Mstn knockout rat. *Biochem Biophys Res Commun*. 2016;477(1):115-22. Epub 2016/06/12. doi:  
1752 10.1016/j.bbrc.2016.06.030. PubMed PMID: 27289021.
- 1753 383. Mendias CL, Lynch EB, Gumucio JP, Flood MD, Rittman DS, Van Pelt DW, et al. Changes in  
1754 skeletal muscle and tendon structure and function following genetic inactivation of myostatin in  
1755 rats. *J Physiol*. 2015;593(8):2037-52. Epub 2015/02/03. doi: 10.1113/jphysiol.2014.287144. PubMed  
1756 PMID: 25640143; PubMed Central PMCID: PMC4405758.
- 1757 384. Fan Z, Li L, Li X, Zhang M, Zhong Y, Li Y, et al. Generation of an oxoglutarate dehydrogenase  
1758 knockout rat model and effect of high-fat diet  
  
1759 RSC Adv. 2018;8:16636-44.
- 1760 385. Stalvey MS, Havasi V, Tuggle KL, Wang D, Birket S, Rowe SM, et al. Reduced bone length,  
1761 growth plate thickness, bone content, and IGF-I as a model for poor growth in the CFTR-deficient rat.  
1762 *PLoS One*. 2017;12(11):e0188497. Epub 2017/12/01. doi: 10.1371/journal.pone.0188497. PubMed  
1763 PMID: 29190650; PubMed Central PMCID: PMC5708703.
- 1764 386. Fujii T, Hirota K, Yasoda A, Takizawa A, Morozumi N, Nakamura R, et al. Rats deficient C-type  
1765 natriuretic peptide suffer from impaired skeletal growth without early death. *PLoS One*.  
1766 2018;13(3):e0194812. Epub 2018/03/23. doi: 10.1371/journal.pone.0194812. PubMed PMID:  
1767 29566041; PubMed Central PMCID: PMC5864047.
- 1768 387. Lambert LJ, Challa AK, Niu A, Zhou L, Tucholski J, Johnson MS, et al. Increased trabecular  
1769 bone and improved biomechanics in an osteocalcin-null rat model created by CRISPR/Cas9  
1770 technology. *Dis Model Mech*. 2016;9(10):1169-79. Epub 2016/08/03. doi: dmm.025247 [pii]  
  
1771 10.1242/dmm.025247. PubMed PMID: 27483347.
- 1772 388. Liu E, Sun L, Zhang Y, Wang A, Yan J. Aquaporin4 Knockout Aggravates Early Brain Injury  
1773 Following Subarachnoid Hemorrhage Through Impairment of the Glymphatic System in Rat Brain.  
1774 *Acta Neurochir Suppl*. 2020;127:59-64. Epub 2019/08/14. doi: 10.1007/978-3-030-04615-6\_10.  
1775 PubMed PMID: 31407064.
- 1776 389. Cheng X, Waghulde H, Mell B, Smedlund K, Vazquez G, Joe B. Pleiotropic Effect of a High  
1777 Resolution Mapped Blood Pressure QTL on Tumorigenesis. *PLoS One*. 2016;11(4):e0153519. Epub  
1778 2016/04/14. doi: 10.1371/journal.pone.0153519. PubMed PMID: 27073989; PubMed Central  
1779 PMCID: PMC4830557.
- 1780 390. Smits BM, Haag JD, Rissman AI, Sharma D, Tran A, Schoenborn AA, et al. The gene desert  
1781 mammary carcinoma susceptibility locus *Mcs1a* regulates *Nr2f1* modifying mammary epithelial cell  
1782 differentiation and proliferation. *PLoS Genet*. 2013;9(6):e1003549. Epub 2013/06/21. doi:  
1783 10.1371/journal.pgen.1003549. PubMed PMID: 23785296; PubMed Central PMCID:  
1784 PMC43681674.
- 1785 391. denDekker AD, Xu X, Vaughn MD, Puckett AH, Gardner LL, Lambring CJ, et al. Rat *Mcs1b* is  
1786 concordant to the genome-wide association-identified breast cancer risk locus at human 5q11.2 and  
1787 *MIER3* is a candidate cancer susceptibility gene. *Cancer Res*. 2012;72(22):6002-12. Epub 2012/09/21.  
1788 doi: 10.1158/0008-5472.CAN-12-0748. PubMed PMID: 22993404; PubMed Central PMCID:  
1789 PMC3500408.
- 1790 392. Xu X, Powell DW, Lambring CJ, Puckett AH, Deschenes L, Prough RA, et al. Human *MCS5A1*  
1791 candidate breast cancer susceptibility gene *FBXO10* is induced by cellular stress and correlated with  
1792 lens epithelium-derived growth factor (LEDGF). *Mol Carcinog*. 2014;53(4):300-13. Epub 2012/11/10.  
1793 doi: 10.1002/mc.21977. PubMed PMID: 23138933.
- 1794 393. Samuelson DJ, Hesselson SE, Aperavich BA, Zan Y, Haag JD, Trentham-Dietz A, et al. Rat  
1795 *Mcs5a* is a compound quantitative trait locus with orthologous human loci that associate with breast

- 1796 cancer risk. *Proc Natl Acad Sci U S A*. 2007;104(15):6299-304. Epub 2007/04/04. doi:  
1797 10.1073/pnas.0701687104. PubMed PMID: 17404222; PubMed Central PMCID: PMCPMC1847458.  
1798 394. Veillet AL, Haag JD, Remfert JL, Meilahn AL, Samuelson DJ, Gould MN. Mcs5c: a mammary  
1799 carcinoma susceptibility locus located in a gene desert that associates with tenascin C expression.  
1800 *Cancer Prev Res (Phila)*. 2011;4(1):97-106. Epub 2011/01/06. doi: 10.1158/1940-6207.CAPR-10-  
1801 0187. PubMed PMID: 21205740; PubMed Central PMCID: PMCPMC3447625.  
1802 395. Henning AN, Haag JD, Smits BM, Gould MN. The Non-coding Mammary Carcinoma  
1803 Susceptibility Locus, Mcs5c, Regulates Pappa Expression via Age-Specific Chromatin Folding and  
1804 Allele-Dependent DNA Methylation. *PLoS Genet*. 2016;12(8):e1006261. Epub 2016/08/19. doi:  
1805 10.1371/journal.pgen.1006261. PubMed PMID: 27537370; PubMed Central PMCID:  
1806 PMCPMC4990333.  
1807 396. Ren X, Graham JC, Jing L, Mikheev AM, Gao Y, Lew JP, et al. Mapping of Mcs30, a new  
1808 mammary carcinoma susceptibility quantitative trait locus (QTL30) on rat chromosome 12:  
1809 identification of fry as a candidate Mcs gene. *PLoS One*. 2013;8(9):e70930. Epub 2013/09/12. doi:  
1810 10.1371/journal.pone.0070930. PubMed PMID: 24023717; PubMed Central PMCID:  
1811 PMCPMC3759375.  
1812 397. Coan PM, Barrier M, Alfazema N, Carter RN, Marion de Proce S, Dopico XC, et al.  
1813 Complement Factor B Is a Determinant of Both Metabolic and Cardiovascular Features of Metabolic  
1814 Syndrome. *Hypertension*. 2017. Epub 2017/07/26. doi: 10.1161/HYPERTENSIONAHA.117.09242.  
1815 PubMed PMID: 28739975; PubMed Central PMCID: PMCPMC5548512.  
1816 398. McDermott-Roe C, Ye J, Ahmed R, Sun XM, Serafin A, Ware J, et al. Endonuclease G is a novel  
1817 determinant of cardiac hypertrophy and mitochondrial function. *Nature*. 2011;478(7367):114-8.  
1818 Epub 2011/10/08. doi: 10.1038/nature10490. PubMed PMID: 21979051; PubMed Central PMCID:  
1819 PMCPMC3189541.  
1820 399. Petretto E, Sarwar R, Grieve I, Lu H, Kumaran MK, Muckett PJ, et al. Integrated genomic  
1821 approaches implicate osteoglycin (Ogn) in the regulation of left ventricular mass. *Nat Genet*.  
1822 2008;40(5):546-52. Epub 2008/04/30. doi: 10.1038/ng.134. PubMed PMID: 18443592; PubMed  
1823 Central PMCID: PMCPMC2742198.  
1824 400. Pravenec M, Kazdova L, Landa V, Zidek V, Mlejnek P, Simakova M, et al. Identification of  
1825 mutated Srebf1 as a QTL influencing risk for hepatic steatosis in the spontaneously hypertensive rat.  
1826 *Hypertension*. 2008;51(1):148-53. Epub 2007/12/12. doi: 10.1161/HYPERTENSIONAHA.107.100743.  
1827 PubMed PMID: 18071061.  
1828 401. Paterson MR, Geurts AM, Kriegel AJ. miR-146b-5p has a sex-specific role in renal and cardiac  
1829 pathology in a rat model of chronic kidney disease. *Kidney Int*. 2019;96(6):1332-45. Epub  
1830 2019/11/02. doi: 10.1016/j.kint.2019.07.017. PubMed PMID: 31668631; PubMed Central PMCID:  
1831 PMCPMC6941490.  
1832 402. Guo H, Xu D, Kuroki M, Lu Z, Xu X, Geurts A, et al. Kidney injury, arterial hypertension and  
1833 left ventricular hypertrophy in rats with loss of function mutation of SOD3. *Free Radic Biol Med*.  
1834 2020. Epub 2020/01/24. doi: 10.1016/j.freeradbiomed.2020.01.023. PubMed PMID: 31972339.  
1835 403. Yokoi N, Komeda K, Wang HY, Yano H, Kitada K, Saitoh Y, et al. Cblb is a major susceptibility  
1836 gene for rat type 1 diabetes mellitus. *Nat Genet*. 2002;31(4):391-4. Epub 2002/07/16. doi:  
1837 10.1038/ng927. PubMed PMID: 12118252.  
1838 404. Arndt T, Wedekind D, Jorns A, Tsiavaliaris G, Cuppen E, Hedrich HJ, et al. A novel Dock8 gene  
1839 mutation confers diabetogenic susceptibility in the LEW.1AR1/Ztm-iddm rat, an animal model of  
1840 human type 1 diabetes. *Diabetologia*. 2015;58(12):2800-9. Epub 2015/09/14. doi: 10.1007/s00125-  
1841 015-3757-7. PubMed PMID: 26363782.  
1842 405. MacMurray AJ, Moralejo DH, Kwitek AE, Rutledge EA, Van Yserloo B, Gohlke P, et al.  
1843 Lymphopenia in the BB rat model of type 1 diabetes is due to a mutation in a novel immune-  
1844 associated nucleotide (Ian)-related gene. *Genome Res*. 2002;12(7):1029-39. Epub 2002/07/05. doi:  
1845 10.1101/gr.412702. PubMed PMID: 12097339; PubMed Central PMCID: PMCPMC186618.

- 1846 406. Hornum L, Romer J, Markholst H. The diabetes-prone BB rat carries a frameshift mutation in  
1847 *Ian4*, a positional candidate of *Iddm1*. *Diabetes*. 2002;51(6):1972-9. Epub 2002/05/29. doi:  
1848 10.2337/diabetes.51.6.1972. PubMed PMID: 12031988.
- 1849 407. Hellquist A, Zucchelli M, Kivinen K, Saarialho-Kere U, Koskenmies S, Widen E, et al. The  
1850 human *GIMAP5* gene has a common polyadenylation polymorphism increasing risk to systemic lupus  
1851 erythematosus. *J Med Genet*. 2007;44(5):314-21. Epub 2007/01/16. doi: 10.1136/jmg.2006.046185.  
1852 PubMed PMID: 17220214; PubMed Central PMCID: PMCPMC2597989.
- 1853 408. Qaisar N, Lin S, Ryan G, Yang C, Oikemus SR, Brodsky MH, et al. A Critical Role for the Type I  
1854 Interferon Receptor in Virus-Induced Autoimmune Diabetes in Rats. *Diabetes*. 2017;66(1):145-57.  
1855 Epub 2016/12/22. doi: db16-0462 [pii]  
1856 10.2337/db16-0462. PubMed PMID: 27999109.
- 1857 409. Rosengren AH, Jokubka R, Tojjar D, Granhall C, Hansson O, Li DQ, et al. Overexpression of  
1858  $\alpha$ 2A-adrenergic receptors contributes to type 2 diabetes. *Science*. 2010;327(5962):217-20. Epub  
1859 2009/12/08. doi: 10.1126/science.1176827. PubMed PMID: 19965390.
- 1860 410. Zhou X, Zhang R, Zou Z, Shen X, Xie T, Xu C, et al. Hypoglycaemic effects of glimepiride in  
1861 sulfonylurea receptor 1 deficient rat. *Br J Pharmacol*. 2019;176(3):478-90. Epub 2018/11/25. doi:  
1862 10.1111/bph.14553. PubMed PMID: 30471094; PubMed Central PMCID: PMCPMC6329628.
- 1863 411. Zhou X, Xu C, Zou Z, Shen X, Xie T, Zhang R, et al. The characteristics of glucose metabolism  
1864 in the sulfonylurea receptor 1 knockout rat model. *Mol Med*. 2019;25(1):2. Epub 2019/01/09. doi:  
1865 10.1186/s10020-018-0067-9. PubMed PMID: 30616503; PubMed Central PMCID: PMCPMC6322298.
- 1866 412. Kanemoto N, Kondo M, Iwanaga T, Hishigaki H, Ono T, Mizoguchi-Miyakita A, et al. Genetic  
1867 analysis of pancreatic duct hyperplasia in Otsuka Long-Evans Tokushima Fatty rats: possible  
1868 association with a region on rat chromosome 14 that includes the disrupted cholecystokinin-A  
1869 receptor gene. *Pathol Int*. 2001;51(3):133-9. Epub 2001/05/01. doi: 10.1046/j.1440-  
1870 1827.2001.01176.x. PubMed PMID: 11328527.
- 1871 413. Takiguchi S, Takata Y, Takahashi N, Kataoka K, Hirashima T, Kawano K, et al. A disrupted  
1872 cholecystokinin A receptor gene induces diabetes in obese rats synergistically with *ODB1* gene. *Am J*  
1873 *Physiol*. 1998;274(2):E265-70. Epub 1998/03/05. doi: 10.1152/ajpendo.1998.274.2.E265. PubMed  
1874 PMID: 9486157.
- 1875 414. Marion E, Kaisaki PJ, Pouillon V, Gueydan C, Levy JC, Bodson A, et al. The gene *INPPL1*,  
1876 encoding the lipid phosphatase *SHIP2*, is a candidate for type 2 diabetes in rat and man. *Diabetes*.  
1877 2002;51(7):2012-7. Epub 2002/06/28. doi: 10.2337/diabetes.51.7.2012. PubMed PMID: 12086927.
- 1878 415. Yagil C, Varadi-Levi R, Yagil Y. A novel mutation in the NADH dehydrogenase (ubiquinone) 1  
1879  $\alpha$  subcomplex 4 (*Ndufa4*) gene links mitochondrial dysfunction to the development of diabetes  
1880 in a rodent model. *Dis Model Mech*. 2018;11(11). Epub 2018/10/27. doi: 10.1242/dmm.036699.  
1881 PubMed PMID: 30361421; PubMed Central PMCID: PMCPMC6262808.
- 1882 416. Gumbilai V, Ebihara K, Aizawa-Abe M, Ebihara C, Zhao M, Yamamoto Y, et al. Fat Mass  
1883 Reduction With Adipocyte Hypertrophy and Insulin Resistance in Heterozygous *PPAR $\gamma$*  Mutant  
1884 Rats. *Diabetes*. 2016;65(10):2954-65. Epub 2016/07/07. doi: 10.2337/db15-1422. PubMed PMID:  
1885 27381370.
- 1886 417. Watanabe TK, Suzuki M, Yamasaki Y, Okuno S, Hishigaki H, Ono T, et al. Mutated G-protein-  
1887 coupled receptor *GPR10* is responsible for the hyperphagia/dyslipidaemia/obesity locus of *Dmo1* in  
1888 the *OETF* rat. *Clin Exp Pharmacol Physiol*. 2005;32(5-6):355-66. Epub 2005/04/28. doi:  
1889 10.1111/j.1440-1681.2005.04196.x. PubMed PMID: 15854142.
- 1890 418. Chen X, Yan Y, Weng Z, Chen C, Lv M, Lin Q, et al. TAK-875 Mitigates  $\beta$ -Cell Lipotoxicity-  
1891 Induced Metaflammation  
1892 Damage through Inhibiting the TLR4-NF- $\kappa$ B Pathway. *J Diabetes Res*. 2019.
- 1893 419. Tsaih SW, Holl K, Jia S, Kaldunski M, Tschannen M, He H, et al. Identification of a novel gene  
1894 for diabetic traits in rats, mice, and humans. *Genetics*. 2014;198(1):17-29. Epub 2014/09/23. doi:



- 1895 10.1534/genetics.114.162982. PubMed PMID: 25236446; PubMed Central PMCID:  
1896 PMCPMC4174929.
- 1897 420. Spires D, Ilatovskaya DV, Levchenko V, North PE, Geurts AM, Palygin O, et al. Protective role  
1898 of Trpc6 knockout in the progression of diabetic kidney disease. *Am J Physiol Renal Physiol*.  
1899 2018;315(4):F1091-F7. Epub 2018/06/21. doi: 10.1152/ajprenal.00155.2018. PubMed PMID:  
1900 29923767; PubMed Central PMCID: PMCPMC6230750.
- 1901 421. Camara M, Beyersdorf N, Fischer HJ, Herold MJ, Ip CW, van den Brandt J, et al. CD8(+) T cell  
1902 help is required for efficient induction of EAE in Lewis rats. *J Neuroimmunol*. 2013;260(1-2):17-27.  
1903 Epub 2013/05/15. doi: 10.1016/j.jneuroim.2013.04.014. PubMed PMID: 23664330.
- 1904 422. Stridh P, Ruhmann S, Bergman P, Thessen Hedreul M, Flytzani S, Beyeen AD, et al. Parent-  
1905 of-origin effects implicate epigenetic regulation of experimental autoimmune encephalomyelitis and  
1906 identify imprinted Dlk1 as a novel risk gene. *PLoS Genet*. 2014;10(3):e1004265. Epub 2014/03/29.  
1907 doi: 10.1371/journal.pgen.1004265. PubMed PMID: 24676147; PubMed Central PMCID:  
1908 PMCPMC3967983.
- 1909 423. Nohra R, Beyeen AD, Guo JP, Khademi M, Sundqvist E, Hedreul MT, et al. RGMA and IL21R  
1910 show association with experimental inflammation and multiple sclerosis. *Genes Immun*.  
1911 2010;11(4):279-93. Epub 2010/01/15. doi: 10.1038/gene.2009.111. PubMed PMID: 20072140.
- 1912 424. Jagodic M, Colacios C, Nohra R, Dejean AS, Beyeen AD, Khademi M, et al. A role for VAV1 in  
1913 experimental autoimmune encephalomyelitis and multiple sclerosis. *Sci Transl Med*.  
1914 2009;1(10):10ra21. Epub 2010/04/07. doi: 10.1126/scitranslmed.3000278. PubMed PMID:  
1915 20368159.
- 1916 425. Beyeen AD, Adzemovic MZ, Ockinger J, Stridh P, Becanovic K, Laaksonen H, et al. IL-22RA2  
1917 associates with multiple sclerosis and macrophage effector mechanisms in experimental  
1918 neuroinflammation. *J Immunol*. 2010;185(11):6883-90. Epub 2010/11/03. doi:  
1919 10.4049/jimmunol.1001392. PubMed PMID: 21041731.
- 1920 426. Huberle A, Beyeen AD, Ockinger J, Ayturan M, Jagodic M, de Graaf KL, et al. Advanced  
1921 intercross line mapping suggests that ncf1 (ean6) regulates severity in an animal model of guillain-  
1922 barre syndrome. *J Immunol*. 2009;182(7):4432-8. Epub 2009/03/21. doi:  
1923 10.4049/jimmunol.0803847. PubMed PMID: 19299744.
- 1924 427. Powell KL, Cain SM, Ng C, Sirdesai S, David LS, Kyi M, et al. A Cav3.2 T-type calcium channel  
1925 point mutation has splice-variant-specific effects on function and segregates with seizure expression  
1926 in a polygenic rat model of absence epilepsy. *J Neurosci*. 2009;29(2):371-80. Epub 2009/01/16. doi:  
1927 10.1523/JNEUROSCI.5295-08.2009. PubMed PMID: 19144837; PubMed Central PMCID:  
1928 PMCPMC6664949.
- 1929 428. Ohno Y, Shimizu S, Tatara A, Imaoku T, Ishii T, Sasa M, et al. Hcn1 is a tremorgenic genetic  
1930 component in a rat model of essential tremor. *PLoS One*. 2015;10(5):e0123529. Epub 2015/05/15.  
1931 doi: 10.1371/journal.pone.0123529. PubMed PMID: 25970616; PubMed Central PMCID:  
1932 PMCPMC4430019.
- 1933 429. Nishitani A, Kunisawa N, Sugimura T, Sato K, Yoshida Y, Suzuki T, et al. Loss of HCN1 subunits  
1934 causes absence epilepsy in rats. *Brain Res*. 2019;1706:209-17. Epub 2018/11/09. doi:  
1935 10.1016/j.brainres.2018.11.004. PubMed PMID: 30408474.
- 1936 430. Chen TD, Rotival M, Chiu LY, Bagnati M, Ko JH, Srivastava PK, et al. Identification of  
1937 Ceruloplasmin as a Gene that Affects Susceptibility to Glomerulonephritis Through Macrophage  
1938 Function. *Genetics*. 2017;206(2):1139-51. Epub 2017/04/30. doi: 10.1534/genetics.116.197376.  
1939 PubMed PMID: 28450461; PubMed Central PMCID: PMCPMC5499168.
- 1940 431. Aitman TJ, Dong R, Vyse TJ, Norsworthy PJ, Johnson MD, Smith J, et al. Copy number  
1941 polymorphism in Fcgr3 predisposes to glomerulonephritis in rats and humans. *Nature*.  
1942 2006;439(7078):851-5. Epub 2006/02/17. doi: 10.1038/nature04489. PubMed PMID: 16482158.
- 1943 432. Page TH, D'Souza Z, Nakanishi S, Serikawa T, Pusey CD, Aitman TJ, et al. Role of novel rat-  
1944 specific Fc receptor in macrophage activation associated with crescentic glomerulonephritis. *J Biol*  
1945 *Chem*. 2012;287(8):5710-9. Epub 2011/12/21. doi: 10.1074/jbc.M111.260695. PubMed PMID:  
1946 22184119; PubMed Central PMCID: PMCPMC3285343.

- 1947 433. Behmoaras J, Bhangal G, Smith J, McDonald K, Mutch B, Lai PC, et al. Jund is a determinant  
1948 of macrophage activation and is associated with glomerulonephritis susceptibility. *Nat Genet.*  
1949 2008;40(5):553-9. Epub 2008/04/30. doi: 10.1038/ng.137. PubMed PMID: 18443593; PubMed  
1950 Central PMCID: PMCPMC2742200.
- 1951 434. Kang H, Kerloc'h A, Rotival M, Xu X, Zhang Q, D'Souza Z, et al. Kcnn4 is a regulator of  
1952 macrophage multinucleation in bone homeostasis and inflammatory disease. *Cell Rep.*  
1953 2014;8(4):1210-24. Epub 2014/08/19. doi: 10.1016/j.celrep.2014.07.032. PubMed PMID: 25131209;  
1954 PubMed Central PMCID: PMCPMC4471813.
- 1955 435. Kosfeld A, Kreuzer M, Daniel C, Brand F, Schafer AK, Chadt A, et al. Whole-exome sequencing  
1956 identifies mutations of TBC1D1 encoding a Rab-GTPase-activating protein in patients with congenital  
1957 anomalies of the kidneys and urinary tract (CAKUT). *Hum Genet.* 2016;135(1):69-87. Epub  
1958 2015/11/18. doi: 10.1007/s00439-015-1610-1. PubMed PMID: 26572137.
- 1959 436. Paglialunga S, Simnett G, Robson H, Hoang M, Pillai R, Arkell AM, et al. The Rab-GTPase  
1960 activating protein, TBC1D1, is critical for maintaining normal glucose homeostasis and beta-cell  
1961 mass. *Appl Physiol Nutr Metab.* 2017;42(6):647-55. Epub 2017/02/09. doi: 10.1139/apnm-2016-  
1962 0585. PubMed PMID: 28177704.
- 1963 437. Whitfield J, Paglialunga S, Smith BK, Miotto PM, Simnett G, Robson HL, et al. Ablating the  
1964 protein TBC1D1 impairs contraction-induced sarcolemmal glucose transporter 4 redistribution but  
1965 not insulin-mediated responses in rats. *J Biol Chem.* 2017;292(40):16653-64. Epub 2017/08/16. doi:  
1966 10.1074/jbc.M117.806786. PubMed PMID: 28808062; PubMed Central PMCID: PMCPMC5633127.
- 1967 438. Monti J, Fischer J, Paskas S, Heinig M, Schulz H, Gosele C, et al. Soluble epoxide hydrolase is a  
1968 susceptibility factor for heart failure in a rat model of human disease. *Nat Genet.* 2008;40(5):529-37.  
1969 Epub 2008/04/30. doi: 10.1038/ng.129. PubMed PMID: 18443590.
- 1970 439. Abdelmagid N, Bereczky-Veress B, Guerreiro-Cacais AO, Bergman P, Luhr KM, Bergstrom T,  
1971 et al. The calcitonin receptor gene is a candidate for regulation of susceptibility to herpes simplex  
1972 type 1 neuronal infection leading to encephalitis in rat. *PLoS Pathog.* 2012;8(6):e1002753. Epub  
1973 2012/07/05. doi: 10.1371/journal.ppat.1002753. PubMed PMID: 22761571; PubMed Central PMCID:  
1974 PMCPMC3386237.
- 1975 440. Bovet-Carmona M, Menigoz A, Pinto S, Tambuyzer T, Krautwald K, Voets T, et al.  
1976 Disentangling the role of TRPM4 in hippocampus-dependent plasticity and learning: an  
1977 electrophysiological, behavioral and fMRI approach. *Brain Struct Funct.* 2018;223(8):3557-76. Epub  
1978 2018/07/05. doi: 10.1007/s00429-018-1706-1. PubMed PMID: 29971514.
- 1979 441. Bovet-Carmona M, Krautwald K, Menigoz A, Vennekens R, Balschun D, Angenstein F. Low  
1980 frequency pulse stimulation of Schaffer collaterals in Trpm4(-/-) knockout rats differently affects  
1981 baseline BOLD signals in target regions of the right hippocampus but not BOLD responses at the site  
1982 of stimulation. *NeuroImage.* 2019;188:347-56. Epub 2018/12/17. doi:  
1983 10.1016/j.neuroimage.2018.12.020. PubMed PMID: 30553915.
- 1984 442. Heinig M, Petretto E, Wallace C, Bottolo L, Rotival M, Lu H, et al. A trans-acting locus  
1985 regulates an anti-viral expression network and type 1 diabetes risk. *Nature.* 2010;467(7314):460-4.  
1986 Epub 2010/09/10. doi: 10.1038/nature09386. PubMed PMID: 20827270; PubMed Central PMCID:  
1987 PMCPMC3657719.
- 1988 443. Ferguson C, McKay M, Harris RA, Homanics GE. Toll-like receptor 4 (Tlr4) knockout rats  
1989 produced by transcriptional activator-like effector nuclease (TALEN)-mediated gene inactivation.  
1990 *Alcohol.* 2013;47(8):595-9. Epub 2013/11/10. doi: 10.1016/j.alcohol.2013.09.043. PubMed PMID:  
1991 24199847; PubMed Central PMCID: PMCPMC3844088.
- 1992 444. Behmoaras J, Diaz AG, Venda L, Ko JH, Srivastava P, Montoya A, et al. Macrophage  
1993 epoxygenase determines a profibrotic transcriptome signature. *J Immunol.* 2015;194(10):4705-16.  
1994 Epub 2015/04/05. doi: 10.4049/jimmunol.1402979. PubMed PMID: 25840911; PubMed Central  
1995 PMCID: PMCPMC4417646.
- 1996 445. Alfazema N, Barrier M, de Proce SM, Menzies RI, Carter R, Stewart K, et al. Camk2n1 Is a  
1997 Negative Regulator of Blood Pressure, Left Ventricular Mass, Insulin Sensitivity, and Promotes  
1998 Adiposity. *Hypertension.* 2019;74(3):687-96. Epub 2019/07/23. doi:

- 1999 10.1161/HYPERTENSIONAHA.118.12409. PubMed PMID: 31327268; PubMed Central PMCID:  
2000 PMCPMC6686962.
- 2001 446. Silhavy J, Krijt J, Sokolova J, Zidek V, Mlejnek P, Simakova M, et al. Dissecting the role of Folr1  
2002 and Folh1 genes in the pathogenesis of metabolic syndrome in spontaneously hypertensive rats.  
2003 *Physiol Res.* 2018;67(4):657-62. Epub 2018/08/17. doi: 10.33549/physiolres.933932. PubMed PMID:  
2004 30113208.
- 2005 447. Pravenec M, Kozich V, Krijt J, Sokolova J, Zidek V, Landa V, et al. Genetic Variation in Renal  
2006 Expression of Folate Receptor 1 (Folr1) Gene Predisposes Spontaneously Hypertensive Rats to  
2007 Metabolic Syndrome. *Hypertension.* 2016;67(2):335-41. Epub 2015/12/17. doi:  
2008 10.1161/HYPERTENSIONAHA.115.06158. PubMed PMID: 26667416.
- 2009 448. Seda O, Krenova D, Oliarynyk O, Sedova L, Krupkova M, Liska F, et al. Heterozygous connexin  
2010 50 mutation affects metabolic syndrome attributes in spontaneously hypertensive rat. *Lipids Health*  
2011 *Dis.* 2016;15(1):199. Epub 2016/11/23. doi: 10.1186/s12944-016-0376-3. PubMed PMID: 27871290;  
2012 PubMed Central PMCID: PMCPMC5117636.
- 2013 449. Houstek J, Hejzlarova K, Vrbacky M, Drahota Z, Landa V, Zidek V, et al. Nonsynonymous  
2014 variants in mt-Nd2, mt-Nd4, and mt-Nd5 are linked to effects on oxidative phosphorylation and  
2015 insulin sensitivity in rat conplastic strains. *Physiol Genomics.* 2012;44(9):487-94. Epub 2012/03/15.  
2016 doi: 10.1152/physiolgenomics.00156.2011. PubMed PMID: 22414913; PubMed Central PMCID:  
2017 PMCPMC3426424.
- 2018 450. Pravenec M, Zidek V, Landa V, Mlejnek P, Silhavy J, Simakova M, et al. Mutant Wars2 gene in  
2019 spontaneously hypertensive rats impairs brown adipose tissue function and predisposes to visceral  
2020 obesity. *Physiol Res.* 2017;66(6):917-24. Epub 2017/12/21. doi: 933811 [pii]. PubMed PMID:  
2021 29261326.
- 2022 451. Wang J, Ma MC, Mennie AK, Pettus JM, Xu Y, Lin L, et al. Systems biology with high-  
2023 throughput sequencing reveals genetic mechanisms underlying the metabolic syndrome in the Lyon  
2024 hypertensive rat. *Circ Cardiovasc Genet.* 2015;8(2):316-26. Epub 2015/01/13. doi:  
2025 10.1161/CIRCGENETICS.114.000520. PubMed PMID: 25573024; PubMed Central PMCID:  
2026 PMCPMC4406788.
- 2027 452. Wang Z, Wang L, Zhang Z, Feng L, Song X, Wu J. Apolipoprotein A-IV involves in glucose and  
2028 lipid metabolism of rat. *Nutr Metab (Lond).* 2019;16:41. Epub 2019/07/16. doi: 10.1186/s12986-019-  
2029 0367-2. PubMed PMID: 31303888; PubMed Central PMCID: PMCPMC6604154.
- 2030 453. Khristi V, Ratri A, Ghosh S, Borosha S, Dai E, Chakravarthi VP, et al. Liver transcriptome data  
2031 of Esr1 knockout male rats reveals altered expression of genes involved in carbohydrate and lipid  
2032 metabolism. *Data Brief.* 2019;22:771-80. Epub 2019/01/24. doi: 10.1016/j.dib.2018.12.089. PubMed  
2033 PMID: 30671521; PubMed Central PMCID: PMCPMC6330359.
- 2034 454. Mul JD, Yi CX, van den Berg SA, Ruiter M, Toonen PW, van der Elst MC, et al. Pmch  
2035 expression during early development is critical for normal energy homeostasis. *Am J Physiol*  
2036 *Endocrinol Metab.* 2010;298(3):E477-88. Epub 2009/11/26. doi: 10.1152/ajpendo.00154.2009.  
2037 PubMed PMID: 19934402.
- 2038 455. Mul JD, O'Duibhir E, Shrestha YB, Koppen A, Vargovic P, Toonen PW, et al. Pmch-deficiency  
2039 in rats is associated with normal adipocyte differentiation and lower sympathetic adipose drive.  
2040 *PLoS One.* 2013;8(3):e60214. Epub 2013/04/05. doi: 10.1371/journal.pone.0060214. PubMed PMID:  
2041 23555928; PubMed Central PMCID: PMCPMC3608591.
- 2042 456. Owen DR, Fan J, Campioli E, Venugopal S, Midzak A, Daly E, et al. TSPO mutations in rats and  
2043 a human polymorphism impair the rate of steroid synthesis. *Biochem J.* 2017;474(23):3985-99. Epub  
2044 2017/10/28. doi: 10.1042/BCJ20170648. PubMed PMID: 29074640; PubMed Central PMCID:  
2045 PMCPMC5697202.
- 2046 457. Yao X, Verkman AS. Marked central nervous system pathology in CD59 knockout rats  
2047 following passive transfer of Neuromyelitis optica immunoglobulin G. *Acta Neuropathol Commun.*  
2048 2017;5(1):15. Epub 2017/02/19. doi: 10.1186/s40478-017-0417-9. PubMed PMID: 28212662;  
2049 PubMed Central PMCID: PMCPMC5316191.

- 2050 458. Yu Q, Tan RZ, Gan Q, Zhong X, Wang YQ, Zhou J, et al. A Novel Rat Model of Nonalcoholic  
2051 Fatty Liver Disease Constructed Through CRISPR/Cas-Based Hydrodynamic Injection. *Mol Biotechnol.*  
2052 2017;59(9-10):365-73. Epub 2017/07/12. doi: 10.1007/s12033-017-0025-8. PubMed PMID:  
2053 28695481.
- 2054 459. Grubinska B, Chen L, Alsaloum M, Rampal N, Matson DJ, Yang C, et al. Rat Nav1.7 loss-of-  
2055 function genetic model: Deficient nociceptive and neuropathic pain behavior with retained olfactory  
2056 function and intra-epidermal nerve fibers. *Mol Pain.* 2019;15:1744806919881846. Epub 2019/09/26.  
2057 doi: 10.1177/1744806919881846. PubMed PMID: 31550995; PubMed Central PMCID:  
2058 PMCPMC6831982.
- 2059 460. Yee JR, Kenkel W, Caccaviello JC, Gamber K, Simmons P, Nedelman M, et al. Identifying the  
2060 integrated neural networks involved in capsaicin-induced pain using fMRI in awake TRPV1 knockout  
2061 and wild-type rats. *Front Syst Neurosci.* 2015;9:15. Epub 2015/03/10. doi:  
2062 10.3389/fnsys.2015.00015. PubMed PMID: 25745388; PubMed Central PMCID: PMCPMC4333803.
- 2063 461. Tucker AB, Stocker SD. Hypernatremia-induced vasopressin secretion is not altered in  
2064 TRPV1-/- rats. *Am J Physiol Regul Integr Comp Physiol.* 2016;311(3):R451-6. Epub 2016/06/24. doi:  
2065 10.1152/ajpregu.00483.2015. PubMed PMID: 27335281; PubMed Central PMCID:  
2066 PMCPMC5142224.
- 2067 462. Westlund KN, Zhang LP, Ma F, Nesemeier R, Ruiz JC, Ostertag EM, et al. A rat knockout  
2068 model implicates TRPC4 in visceral pain sensation. *Neuroscience.* 2014;262:165-75. Epub  
2069 2014/01/07. doi: 10.1016/j.neuroscience.2013.12.043. PubMed PMID: 24388923; PubMed Central  
2070 PMCID: PMCPMC3950480.
- 2071 463. Huang F, Wang X, Ostertag EM, Nuwal T, Huang B, Jan YN, et al. TMEM16C facilitates Na(+)-  
2072 activated K<sup>+</sup> currents in rat sensory neurons and regulates pain processing. *Nat Neurosci.*  
2073 2013;16(9):1284-90. Epub 2013/07/23. doi: 10.1038/nn.3468. PubMed PMID: 23872594; PubMed  
2074 Central PMCID: PMCPMC4034143.
- 2075 464. Akiyama K, Morita H, Suetsugu S, Kuraba S, Numata Y, Yamamoto Y, et al. Actin-related  
2076 protein 3 (Arp3) is mutated in proteinuric BUF/Mna rats. *Mamm Genome.* 2008;19(1):41-50. Epub  
2077 2007/12/08. doi: 10.1007/s00335-007-9078-5. PubMed PMID: 18064521.
- 2078 465. Rangel-Filho A, Lazar J, Moreno C, Geurts A, Jacob HJ. Rab38 modulates proteinuria in model  
2079 of hypertension-associated renal disease. *J Am Soc Nephrol.* 2013;24(2):283-92. Epub 2013/01/08.  
2080 doi: 10.1681/ASN.2012090927. PubMed PMID: 23291471; PubMed Central PMCID:  
2081 PMCPMC3559491.
- 2082 466. Fan F, Geurts AM, Pabbidi MR, Ge Y, Zhang C, Wang S, et al. A Mutation in gamma-Adducin  
2083 Impairs Autoregulation of Renal Blood Flow and Promotes the Development of Kidney Disease. *J Am*  
2084 *Soc Nephrol.* 2020. Epub 2020/02/08. doi: 10.1681/ASN.2019080784. PubMed PMID: 32029431.
- 2085 467. Fan F, Pabbidi MR, Ge Y, Li L, Wang S, Mims PN, et al. Knockdown of Add3 impairs the  
2086 myogenic response of renal afferent arterioles and middle cerebral arteries. *Am J Physiol Renal*  
2087 *Physiol.* 2017;312(6):F971-F81. Epub 2016/12/09. doi: 10.1152/ajprenal.00529.2016. PubMed PMID:  
2088 27927653; PubMed Central PMCID: PMCPMC5495887.
- 2089 468. Yeo NC, O'Meara CC, Bonomo JA, Veth KN, Tomar R, Flister MJ, et al. Shroom3 contributes to  
2090 the maintenance of the glomerular filtration barrier integrity. *Genome Res.* 2015;25(1):57-65. Epub  
2091 2014/10/03. doi: 10.1101/gr.182881.114. PubMed PMID: 25273069; PubMed Central PMCID:  
2092 PMCPMC4317173.
- 2093 469. Chen CC, Geurts AM, Jacob HJ, Fan F, Roman RJ. Heterozygous knockout of transforming  
2094 growth factor-beta1 protects Dahl S rats against high salt-induced renal injury. *Physiol Genomics.*  
2095 2013;45(3):110-8. Epub 2012/12/20. doi: 10.1152/physiolgenomics.00119.2012. PubMed PMID:  
2096 23249995; PubMed Central PMCID: PMCPMC3568879.
- 2097 470. Schulz A, Muller NV, van de Lest NA, Eisenreich A, Schmidbauer M, Barysenka A, et al.  
2098 Analysis of the genomic architecture of a complex trait locus in hypertensive rat models links  
2099 Tmem63c to kidney damage. *Elife.* 2019;8. Epub 2019/03/23. doi: 10.7554/eLife.42068. PubMed  
2100 PMID: 30900988; PubMed Central PMCID: PMCPMC6478434.

- 2101 471. Williams JM, Johnson AC, Stelloh C, Dreisbach AW, Franceschini N, Regner KR, et al. Genetic  
2102 variants in Arhgef11 are associated with kidney injury in the Dahl salt-sensitive rat. *Hypertension*.  
2103 2012;60(5):1157-68. Epub 2012/09/19. doi: 10.1161/HYPERTENSIONAHA.112.199240. PubMed  
2104 PMID: 22987919; PubMed Central PMCID: PMC3505884.
- 2105 472. Lazar J, O'Meara CC, Sarkis AB, Prisco SZ, Xu H, Fox CS, et al. SORCS1 contributes to the  
2106 development of renal disease in rats and humans. *Physiol Genomics*. 2013;45(16):720-8. Epub  
2107 2013/06/20. doi: [physiolgenomics.00089.2013](https://doi.org/10.1152/physiolgenomics.00089.2013) [pii]  
10.1152/physiolgenomics.00089.2013. PubMed PMID: 23780848.
- 2108 473. Westbrook L, Johnson AC, Regner KR, Williams JM, Mattson DL, Kyle PB, et al. Genetic  
2109 susceptibility and loss of Nr4a1 enhances macrophage-mediated renal injury in CKD. *J Am Soc*  
2110 *Nephrol*. 2014;25(11):2499-510. Epub 2014/04/12. doi: 10.1681/ASN.2013070786. PubMed PMID:  
2111 24722447; PubMed Central PMCID: PMC4214519.
- 2112 474. Wang F, Zhang G, Lu Z, Geurts AM, Usa K, Jacob HJ, et al. Antithrombin III/SerpinC1  
2113 insufficiency exacerbates renal ischemia/reperfusion injury. *Kidney Int*. 2015;88(4):796-803. Epub  
2114 2015/06/25. doi: 10.1038/ki.2015.176. PubMed PMID: 26108065; PubMed Central PMCID:  
2115 PMC4589441.
- 2116 475. Rintisch C, Ameri J, Olofsson P, Luthman H, Holmdahl R. Positional cloning of the Igl genes  
2117 controlling rheumatoid factor production and allergic bronchitis in rats. *Proc Natl Acad Sci U S A*.  
2118 2008;105(37):14005-10. Epub 2008/09/10. doi: 10.1073/pnas.0803956105. PubMed PMID:  
2119 18779593; PubMed Central PMCID: PMC2544569.
- 2120 476. Dhande IS, Kneeder SC, Joshi AS, Zhu Y, Hicks MJ, Wenderfer SE, et al. Germ-line genetic  
2121 variation in the immunoglobulin heavy chain creates stroke susceptibility in the spontaneously  
2122 hypertensive rat. *Physiol Genomics*. 2019;51(11):578-85. Epub 2019/10/15. doi:  
2123 10.1152/physiolgenomics.00054.2019. PubMed PMID: 31608789; PubMed Central PMCID:  
2124 PMC6879812.
- 2125 477. Rubattu S, Lee-Kirsch MA, DePaolis P, Giliberti R, Gigante B, Lombardi A, et al. Altered  
2126 structure, regulation, and function of the gene encoding the atrial natriuretic peptide in the stroke-  
2127 prone spontaneously hypertensive rat. *Circ Res*. 1999;85(10):900-5. Epub 1999/11/13. doi:  
2128 10.1161/01.res.85.10.900. PubMed PMID: 10559136.
- 2129 478. Rubattu S, Ridker P, Stampfer MJ, Volpe M, Hennekens CH, Lindpaintner K. The gene  
2130 encoding atrial natriuretic peptide and the risk of human stroke. *Circulation*. 1999;100(16):1722-6.  
2131 Epub 1999/10/20. doi: 10.1161/01.cir.100.16.1722. PubMed PMID: 10525492.
- 2132 479. Bai L, Shi G, Ma Y, Zhang L, Guan F, Zhang X, et al. Paraoxonase 1 knockout rats have  
2133 impaired T cell development at the CD4/CD8 double-negative to double-positive transition stage. *Sci*  
2134 *Rep*. 2018;8(1):14457. Epub 2018/09/29. doi: 10.1038/s41598-018-32780-w. PubMed PMID:  
2135 30262871; PubMed Central PMCID: PMC6160460.
- 2136 480. Tuncel J, Haag S, Yau AC, Norin U, Baud A, Lonblom E, et al. Natural polymorphisms in Tap2  
2137 influence negative selection and CD4ratioCD8 lineage commitment in the rat. *PLoS Genet*.  
2138 2014;10(2):e1004151. Epub 2014/03/04. doi: 10.1371/journal.pgen.1004151. PubMed PMID:  
2139 24586191; PubMed Central PMCID: PMC3930506.
- 2140 481. Harrill JA, Hukkanen RR, Lawson M, Martin G, Gilger B, Soldatow V, et al. Knockout of the  
2141 aryl hydrocarbon receptor results in distinct hepatic and renal phenotypes in rats and mice. *Toxicol*  
2142 *Appl Pharmacol*. 2013;272(2):503-18. Epub 2013/07/19. doi: 10.1016/j.taap.2013.06.024. PubMed  
2143 PMID: 23859880.
- 2144 482. Hunter SR, Vonk A, Mullen Grey AK, Riddick DS. Role of Glucocorticoid Receptor and  
2145 Pregnane X Receptor in Dexamethasone Induction of Rat Hepatic Aryl Hydrocarbon Receptor  
2146 Nuclear Translocator and NADPH-Cytochrome P450 Oxidoreductase. *Drug Metab Dispos*.  
2147 2017;45(2):118-29. Epub 2016/11/20. doi: 10.1124/dmd.116.073833. PubMed PMID: 27856527.
- 2148 483. Haines C, Chatham LR, Vardy A, Elcombe CR, Foster JR, Lake BG. Comparison of the hepatic  
2149 and thyroid gland effects of sodium phenobarbital in wild type and constitutive androstane receptor  
2150 (CAR) knockout rats and pregnenolone-16alpha-carbonitrile in wild type and pregnane X receptor  
2151 (CAR) knockout rats and pregnenolone-16alpha-carbonitrile in wild type and pregnane X receptor

- 2152 (PXR) knockout rats. *Toxicology*. 2018;400-401:20-7. Epub 2018/03/20. doi:  
2153 10.1016/j.tox.2018.03.002. PubMed PMID: 29548889.
- 2154 484. Stepp DW, Osakwe CC, Belin de Chantemele EJ, Mintz JD. Vascular effects of deletion of  
2155 melanocortin-4 receptors in rats. *Physiol Rep*. 2013;1(6):e00146. Epub 2014/01/09. doi:  
2156 10.1002/phy2.146. PubMed PMID: 24400148; PubMed Central PMCID: PMC3871461.
- 2157 485. Priestley JR, Kautenburg KE, Casati MC, Endres BT, Geurts AM, Lombard JH. The NRF2  
2158 knockout rat: a new animal model to study endothelial dysfunction, oxidant stress, and  
2159 microvascular rarefaction. *Am J Physiol Heart Circ Physiol*. 2016;310(4):H478-87. Epub 2015/12/08.  
2160 doi: 10.1152/ajpheart.00586.2015. PubMed PMID: 26637559; PubMed Central PMCID:  
2161 PMC3871461.
- 2162 486. Beyer AM, Raffai G, Weinberg BD, Fredrich K, Rodgers MS, Geurts AM, et al. Amelioration of  
2163 salt-induced vascular dysfunction in mesenteric arteries of Dahl salt-sensitive rats by missense  
2164 mutation of extracellular superoxide dismutase. *Am J Physiol Heart Circ Physiol*. 2014;306(3):H339-  
2165 47. Epub 2013/12/11. doi: 10.1152/ajpheart.00619.2012. PubMed PMID: 24322611; PubMed  
2166 Central PMCID: PMC3920146.
- 2167 487. Miller B, Palygin O, Rufanova VA, Chong A, Lazar J, Jacob HJ, et al. p66Shc regulates renal  
2168 vascular tone in hypertension-induced nephropathy. *J Clin Invest*. 2016;126(7):2533-46. Epub  
2169 2016/06/09. doi: 10.1172/JCI75079. PubMed PMID: 27270176; PubMed Central PMCID:  
2170 PMC4922697.
- 2171
